# Supplementary material for: New Cyclopiane Diterpenes and Polyketide Derivatives from Marine Sediment-Derived Fungus Penicillium antarcticum KMM 4670 and Their Biological Activities
Source: MDPI journal article supplement (doi:10.3390/md21110584), 2023-11-09

SUPPLEMENTARY MATERIAL

**New antimicrobial cyclopiane diterpenes and polyketide derivatives from marine sediment-derived fungus *Penicillium antarcticum* KMM 4670**

## Content

|                                                                                                  |    |
|--------------------------------------------------------------------------------------------------|----|
| Figure S1. $^1\text{H}$ NMR spectrum (700 MHz, $\text{CDCl}_3$ ) of 1 .....                      | 4  |
| Figure S2. $^{13}\text{C}$ NMR spectrum (125.75 MHz, $\text{CDCl}_3$ ) of 1 .....                | 6  |
| Figure S3. DEPT NMR spectrum (700 MHz, $\text{CDCl}_3$ ) of 1 .....                              | 7  |
| Figure S4. HSQC NMR spectrum (700 MHz, $\text{CDCl}_3$ ) of 1 .....                              | 8  |
| Figure S5. HMBC NMR spectrum (700 MHz, $\text{CDCl}_3$ ) of 1 .....                              | 9  |
| Figure S6. $^1\text{H}$ - $^1\text{H}$ COSY NMR spectrum (700 MHz, $\text{CDCl}_3$ ) of 1 .....  | 10 |
| Figure S7. ROESY NMR spectrum (700 MHz, $\text{CDCl}_3$ ) of 1 .....                             | 11 |
| Figure S8. $^1\text{H}$ NMR spectrum (700 MHz, $\text{CDCl}_3$ ) of 2 .....                      | 12 |
| Figure S9. $^{13}\text{C}$ NMR spectrum (125 MHz, $\text{CDCl}_3$ ) of 2 .....                   | 14 |
| Figure S10. DEPT NMR spectrum (700 MHz, $\text{CDCl}_3$ ) of 2.....                              | 15 |
| Figure S11. HSQC NMR spectrum (700 MHz, $\text{CDCl}_3$ ) of 2.....                              | 16 |
| Figure S12. HMBC NMR spectrum (700 MHz, $\text{CDCl}_3$ ) of 2.....                              | 17 |
| Figure S13. $^1\text{H}$ - $^1\text{H}$ COSY NMR spectrum (700 MHz, $\text{CDCl}_3$ ) of 2 ..... | 18 |
| Figure S14. ROESY NMR spectrum (700 MHz, $\text{CDCl}_3$ ) of 2 .....                            | 19 |
| Figure S15. $^1\text{H}$ NMR spectrum (700 MHz, $\text{CDCl}_3$ ) of 3 .....                     | 20 |
| Figure S16. $^{13}\text{C}$ NMR spectrum (700 MHz, $\text{CDCl}_3$ ) of 3 .....                  | 23 |
| Figure S17. $^1\text{H}$ NMR spectrum (700 MHz, $\text{CDCl}_3$ ) of 4 .....                     | 24 |
| Figure S18. $^{13}\text{C}$ NMR spectrum (700 MHz, $\text{CDCl}_3$ ) of 4 .....                  | 26 |
| Figure S19. $^1\text{H}$ NMR spectrum (500 MHz, $\text{CDCl}_3$ ) of 5 .....                     | 27 |
| Figure S20. $^{13}\text{C}$ NMR spectrum (500 MHz, $\text{CDCl}_3$ ) of 5.....                   | 28 |
| Figure S21. DEPT NMR spectrum (500 MHz, $\text{CDCl}_3$ ) of 5 .....                             | 29 |
| Figure S22. HSQC NMR spectrum (500 MHz, $\text{CDCl}_3$ ) of 5.....                              | 30 |
| Figure S23. HMBC NMR spectrum (500 MHz, $\text{CDCl}_3$ ) of 5 .....                             | 31 |
| Figure S24. $^1\text{H}$ - $^1\text{H}$ COSY NMR spectrum (500 MHz, $\text{CDCl}_3$ ) of 5.....  | 32 |
| Figure S25. NOESY NMR spectrum (500 MHz, $\text{CDCl}_3$ ) of 5 .....                            | 33 |
| Figure S26. $^1\text{H}$ NMR spectrum (500 MHz, acetone- $\text{d}_6$ ) of 6.....                | 34 |
| Figure S27. $^{13}\text{C}$ NMR spectrum (500 MHz, acetone- $\text{d}_6$ ) of 6.....             | 36 |
| Figure S28. UV spectrum of 1 .....                                                               | 37 |
| Figure S29. CD spectrum of 1 .....                                                               | 37 |
| Figure S30. UV spectrum of 2 .....                                                               | 38 |
| Figure S31. CD spectrum of 2 .....                                                               | 38 |
| Figure S32. UV spectrum of 3 .....                                                               | 39 |
| Figure S33. CD spectrum of 3 .....                                                               | 39 |
| Figure S34. UV spectrum of 4 .....                                                               | 40 |
| Figure S35. The experimental and calculated ECD spectra of 4 .....                               | 40 |
| Figure S36. UV spectrum of 5 .....                                                               | 41 |
| Figure S37. CD spectrum of 5 .....                                                               | 41 |
| Figure S38. HR (+)ESI MS spectrum of 1.....                                                      | 42 |
| Figure S39. HR (+)ESI MS spectrum of 2.....                                                      | 42 |
| Figure S40. HR (+)ESI MS spectrum of 3.....                                                      | 42 |

|                                                                                                                                       |    |
|---------------------------------------------------------------------------------------------------------------------------------------|----|
| Figure S41. HR (+)ESI MS spectrum of 4.....                                                                                           | 43 |
| Figure S42. HR (+)ESI MS spectrum of 5.....                                                                                           | 43 |
| Figure S43. HR (+)ESI MS spectrum of 6.....                                                                                           | 43 |
| Figure S44. <sup>1</sup> H NMR spectrum for ( <i>R</i> )-MTPA esters (500 MHz, CDCl <sub>3</sub> ) of (3b) .....                      | 44 |
| Figure S45. <sup>1</sup> H- <sup>1</sup> H COSY NMR spectrum for ( <i>R</i> )-MTPA esters (500 MHz, CDCl <sub>3</sub> ) of (3b) ..... | 45 |
| Figure S46. HR (+)ESI MS spectrum of for ( <i>R</i> )-MTPA esters of (3b) .....                                                       | 46 |
| Figure S47. <sup>1</sup> H NMR spectrum for ( <i>S</i> )-MTPA esters (500 MHz, CDCl <sub>3</sub> ) of (3a) .....                      | 47 |
| Figure S48. <sup>1</sup> H- <sup>1</sup> H COSY NMR spectrum for ( <i>S</i> )-MTPA esters (500 MHz, CDCl <sub>3</sub> ) of (3a).....  | 48 |
| Figure S49. HR (+)ESI MS spectrum of for ( <i>S</i> )-MTPA esters of (3a) .....                                                       | 49 |
| Figure S50. Comparison of the experimental ECD spectra of compounds 1–4 .....                                                         | 49 |

Figure S1.  $^1\text{H}$  NMR spectrum (700 MHz,  $\text{CDCl}_3$ ) of **1**

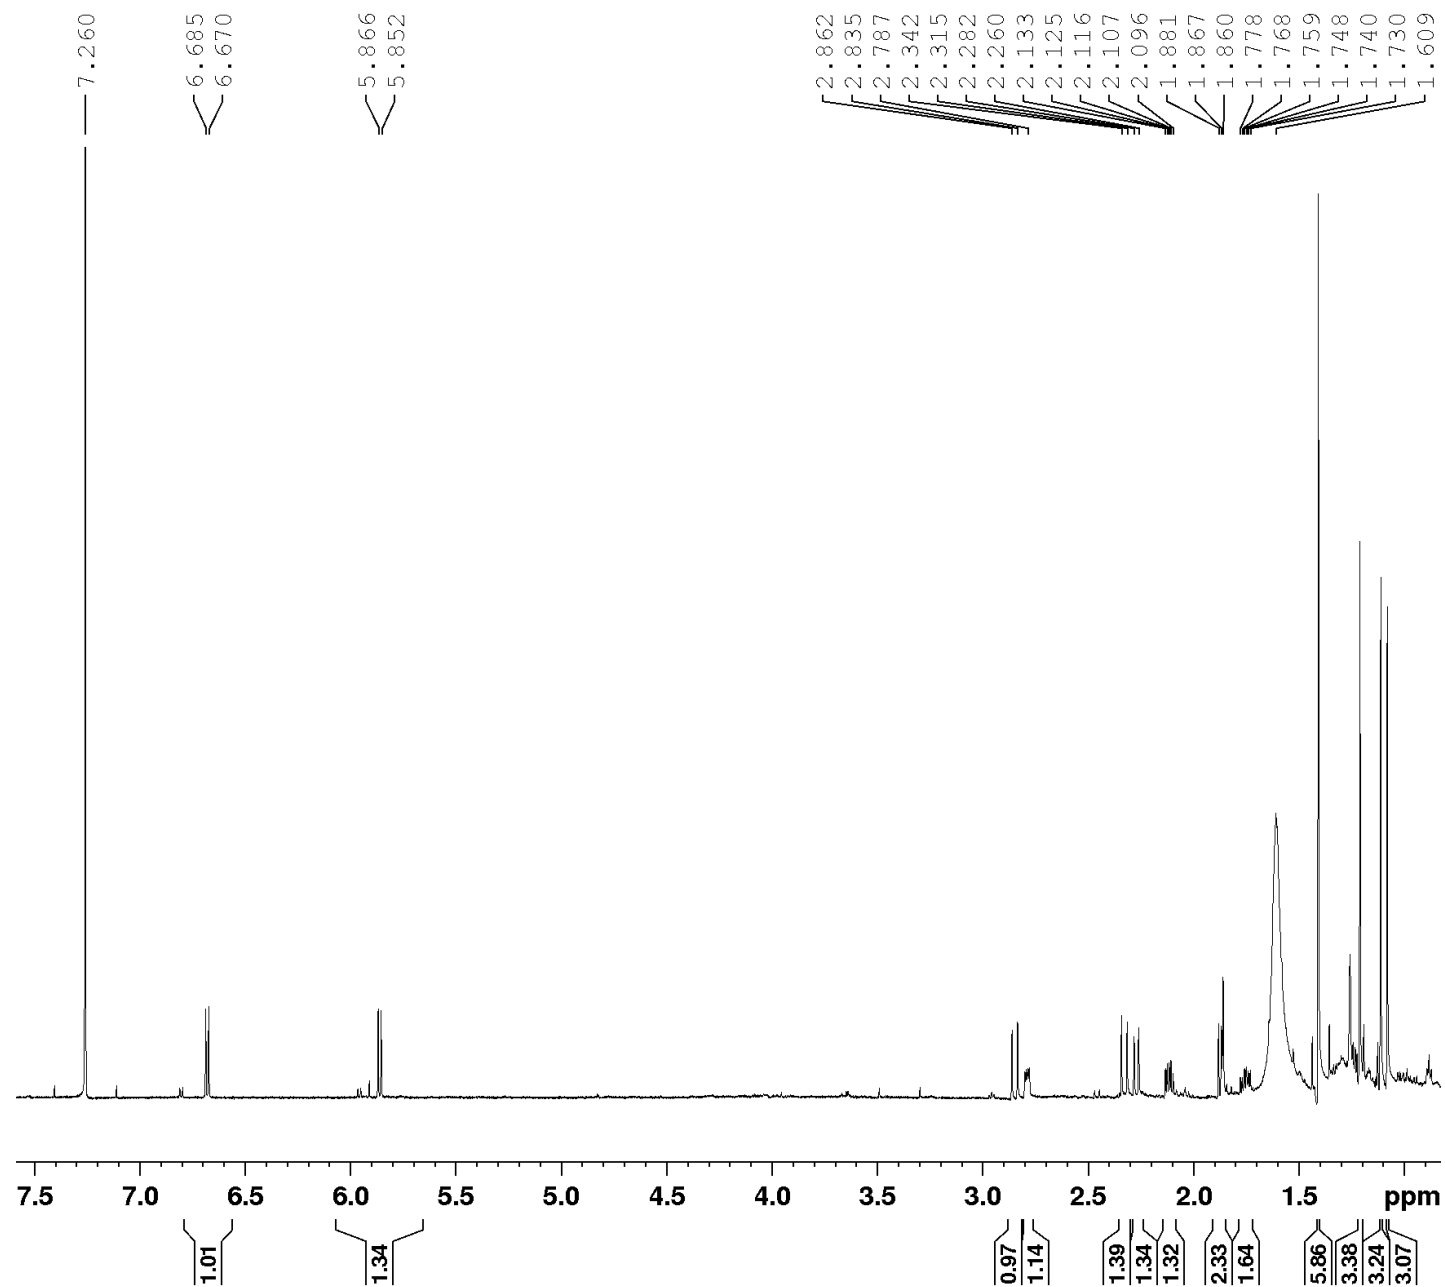

Current Data Parameters

NAME CF-60ch  
EXPNO 1  
PROCNO 1

F2 - Acquisition Parameters

Date\_ 20220530  
Time 12.00 h  
INSTRUM spect  
PROBHD Z134216\_0006 (  
PULPROG zg30  
TD 32768  
SOLVENT  $\text{CDCl}_3$   
NS 16  
DS 2  
SWH 10504.202 Hz  
FIDRES 0.641126 Hz  
AQ 1.5597568 sec  
RG 165.68  
DW 47.600 usec  
DE 6.50 usec  
TE 303.0 K  
D1 2.00000000 sec  
TD0 1  
SFO1 700.0051100 MHz  
NUC1  $^1\text{H}$   
P0 5.33 usec  
P1 16.00 usec  
PLW1 11.27900028 W

F2 - Processing parameters

SI 32768  
SF 700.0000162 MHz  
WDW EM  
SSB 0  
LB 0.10 Hz  
GB 0  
PC 4.00

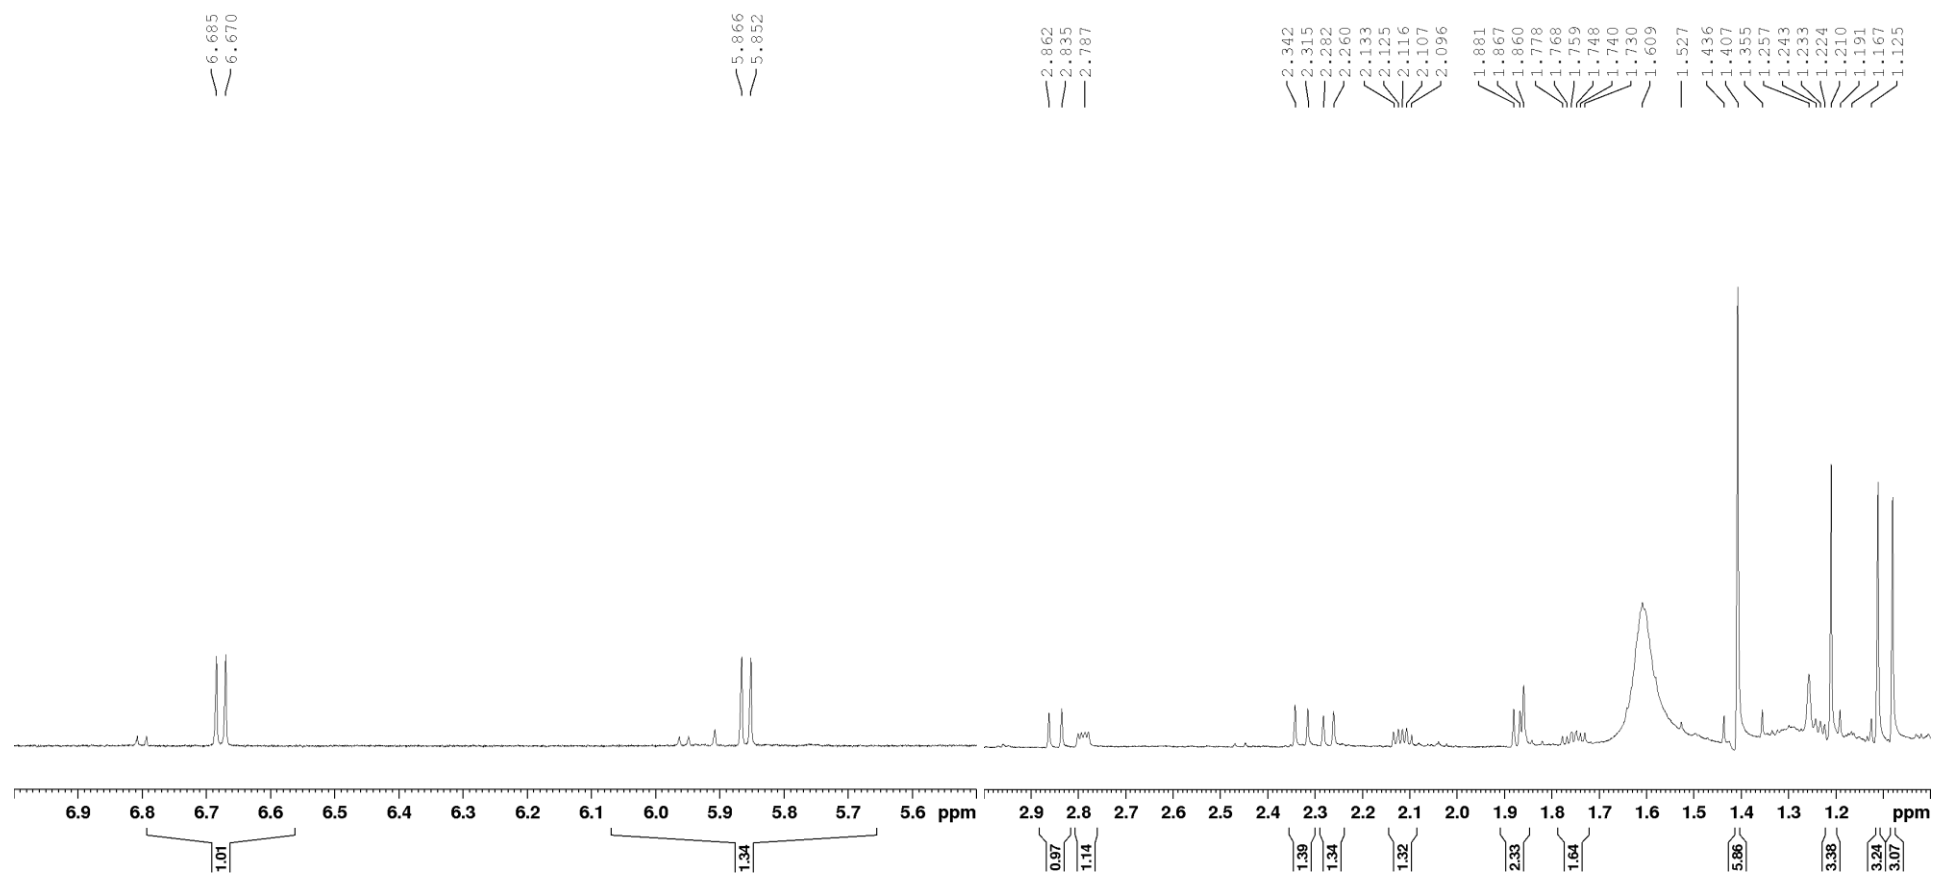

Figure S2.  $^{13}\text{C}$  NMR spectrum (125.75 MHz,  $\text{CDCl}_3$ ) of **1**

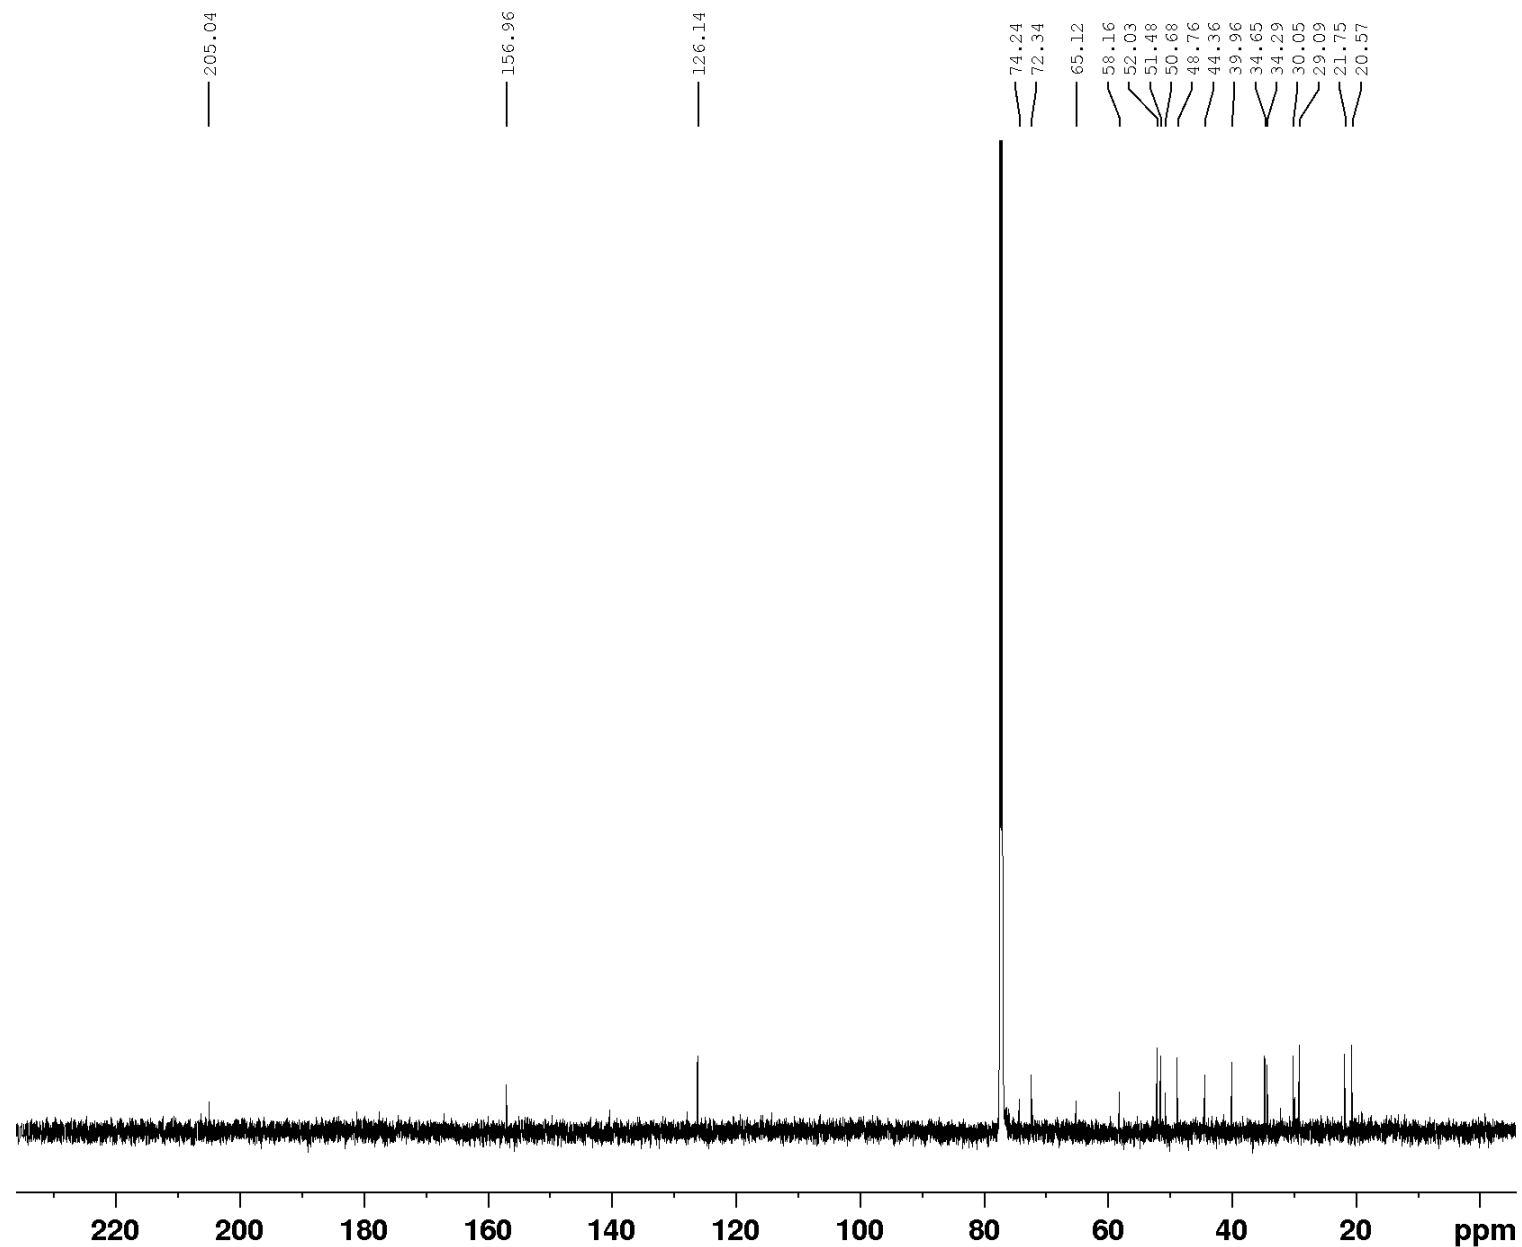

Current Data Parameters  
NAME CF-60ch  
EXPNO 14  
PROCNO 1

F2 - Acquisition Parameters  
Date\_ 20220530  
Time 17.37 h  
INSTRUM spect  
PROBHD Z134216\_0006 (  
PULPROG zgpg30  
TD 32768  
SOLVENT  $\text{CDCl}_3$   
NS 7592  
DS 4  
SWH 42613.637 Hz  
FIDRES 2.600930 Hz  
AQ 0.3844779 sec  
RG 191.01  
DW 11.733 usec  
DE 6.50 usec  
TE 303.0 K  
D1 2.00000000 sec  
D11 0.03000000 sec  
TD0 4096  
SFO1 176.0353837 MHz  
NUC1  $^{13}\text{C}$   
P0 4.00 usec  
P1 12.00 usec  
PLW1 61.49700165 W  
SFO2 700.0021000 MHz  
NUC2  $^1\text{H}$   
CPDPRG2 waltz16  
PCPD2 65.00 usec  
PLW2 11.27900028 W  
PLW12 0.68339998 W  
PLW13 0.34412000 W

F2 - Processing parameters  
SI 65536  
SF 176.0151108 MHz  
WDW EM  
SSB 0  
LB 2.00 Hz  
GB 0  
PC 1.20

Figure S3. DEPT NMR spectrum (700 MHz, CDCl<sub>3</sub>) of **1**

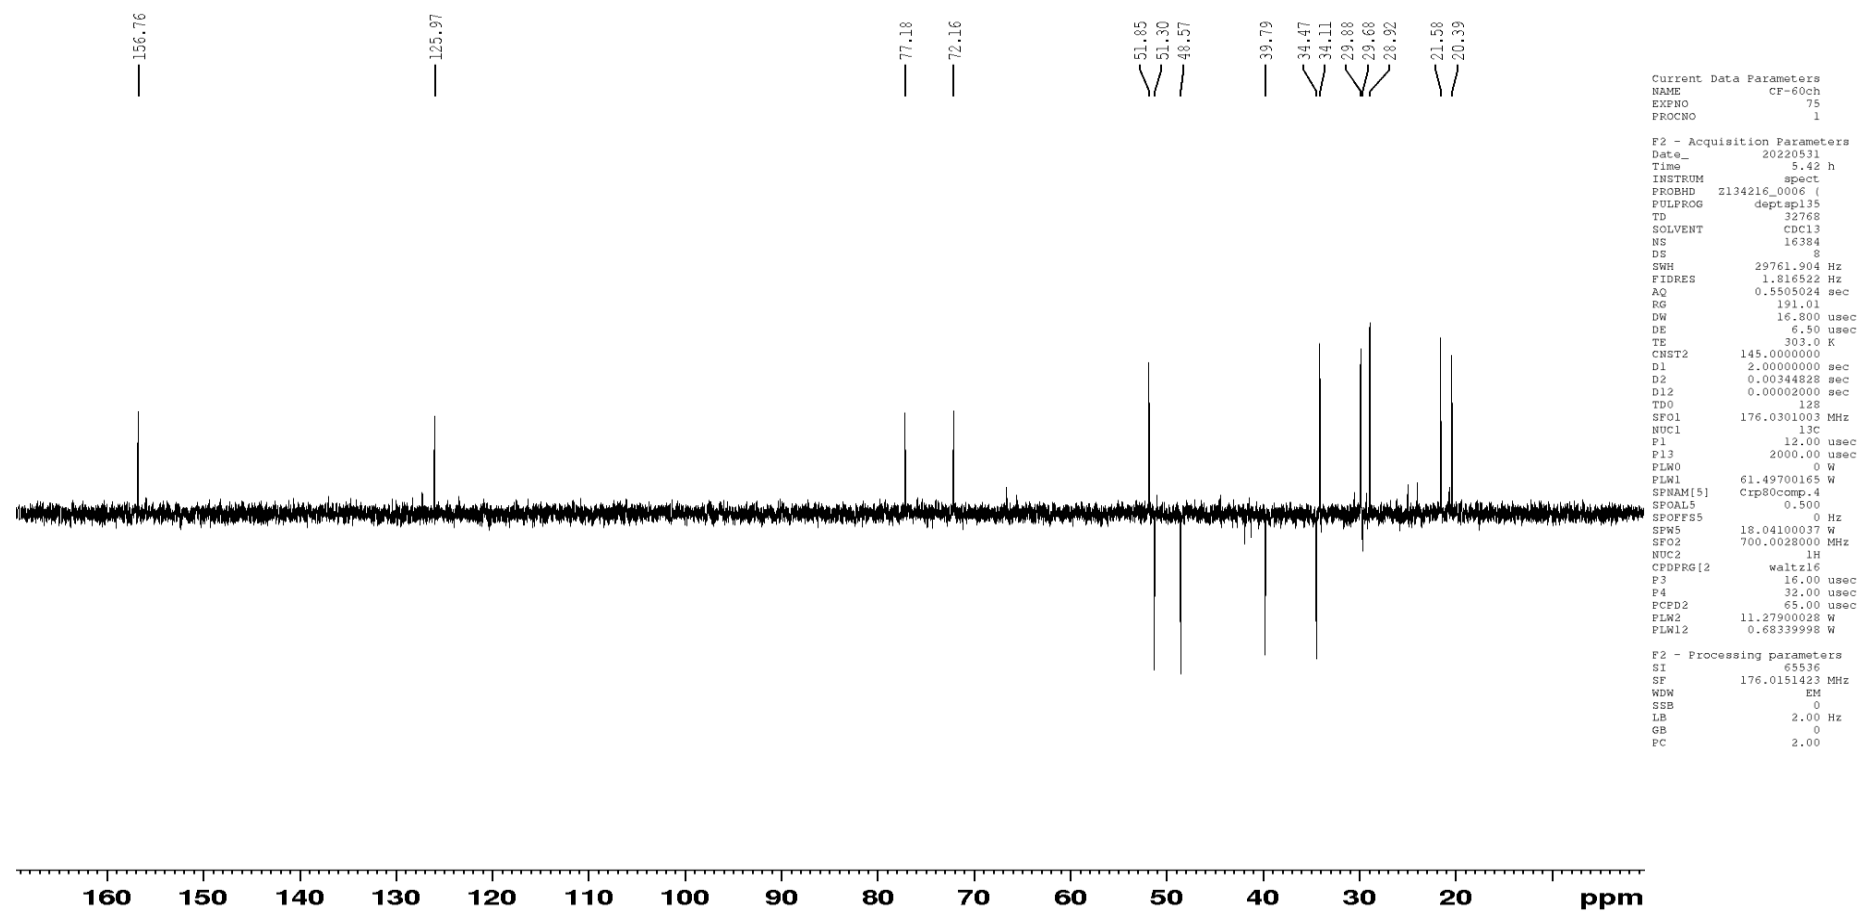

Figure S4. HSQC NMR spectrum (700 MHz, CDCl<sub>3</sub>) of 1

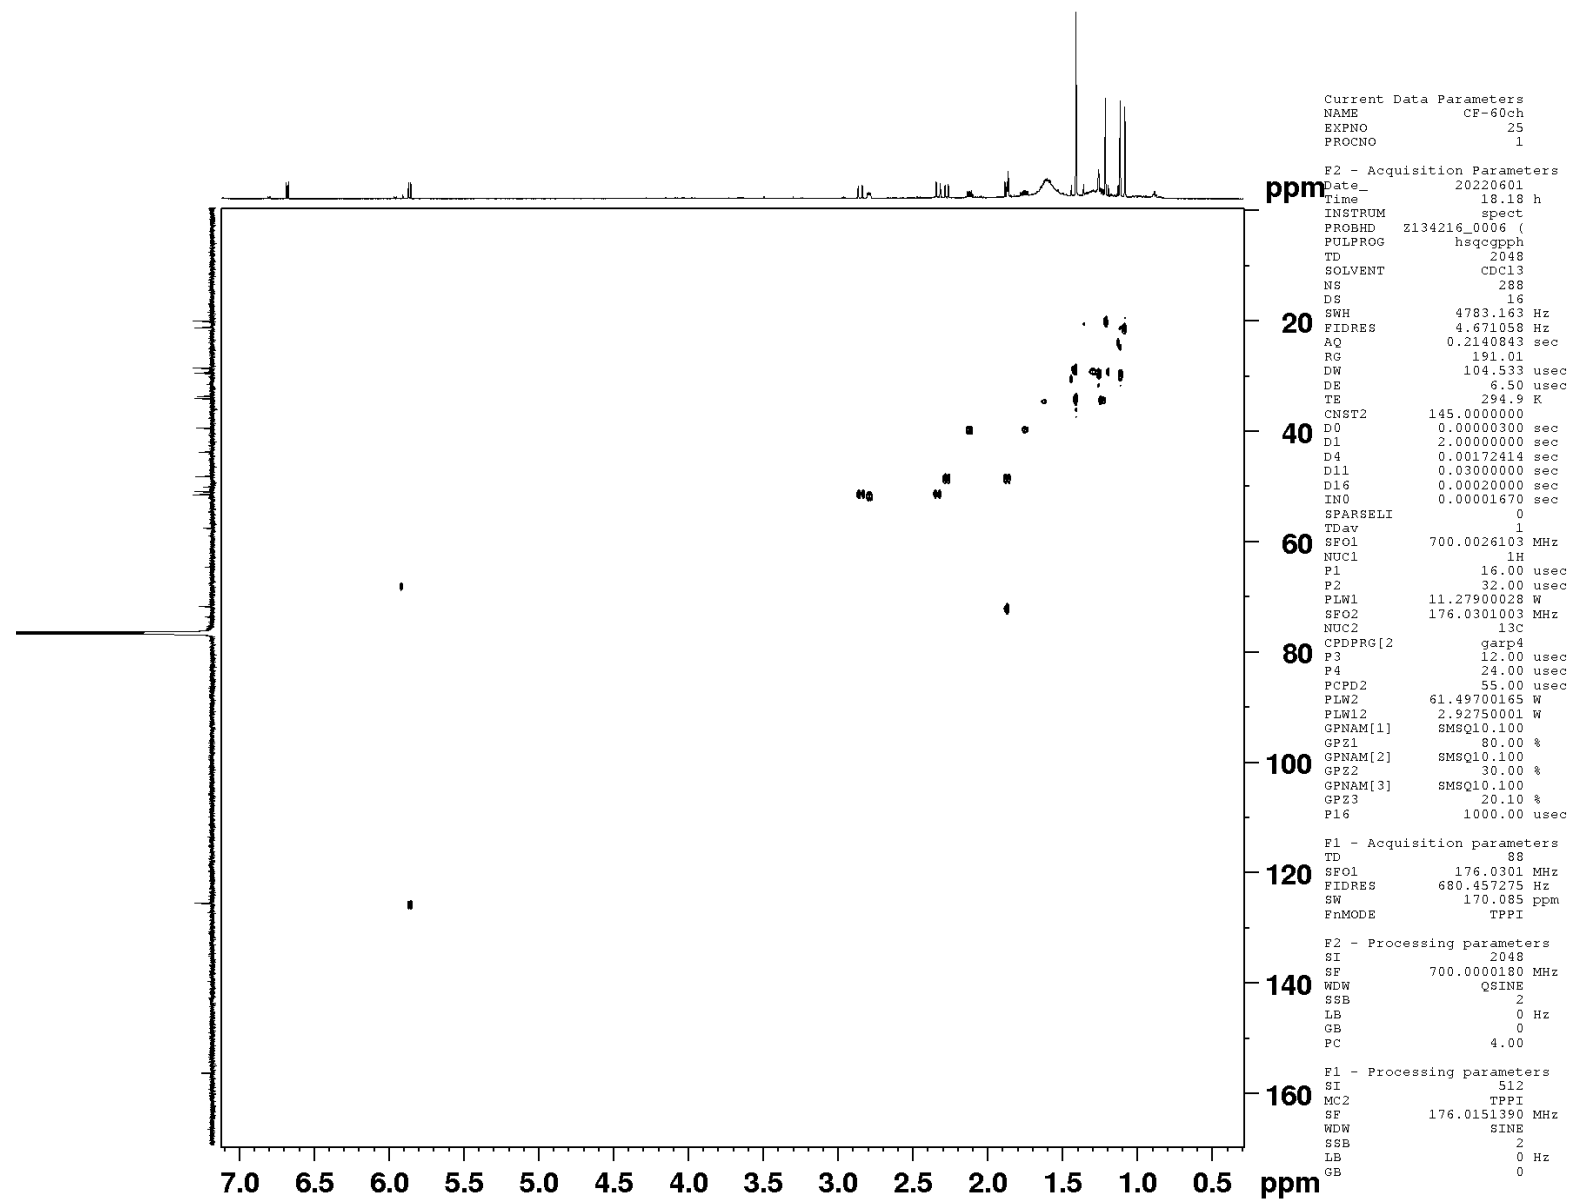



Figure S5. HMBC NMR spectrum (700 MHz, CDCl<sub>3</sub>) of 1

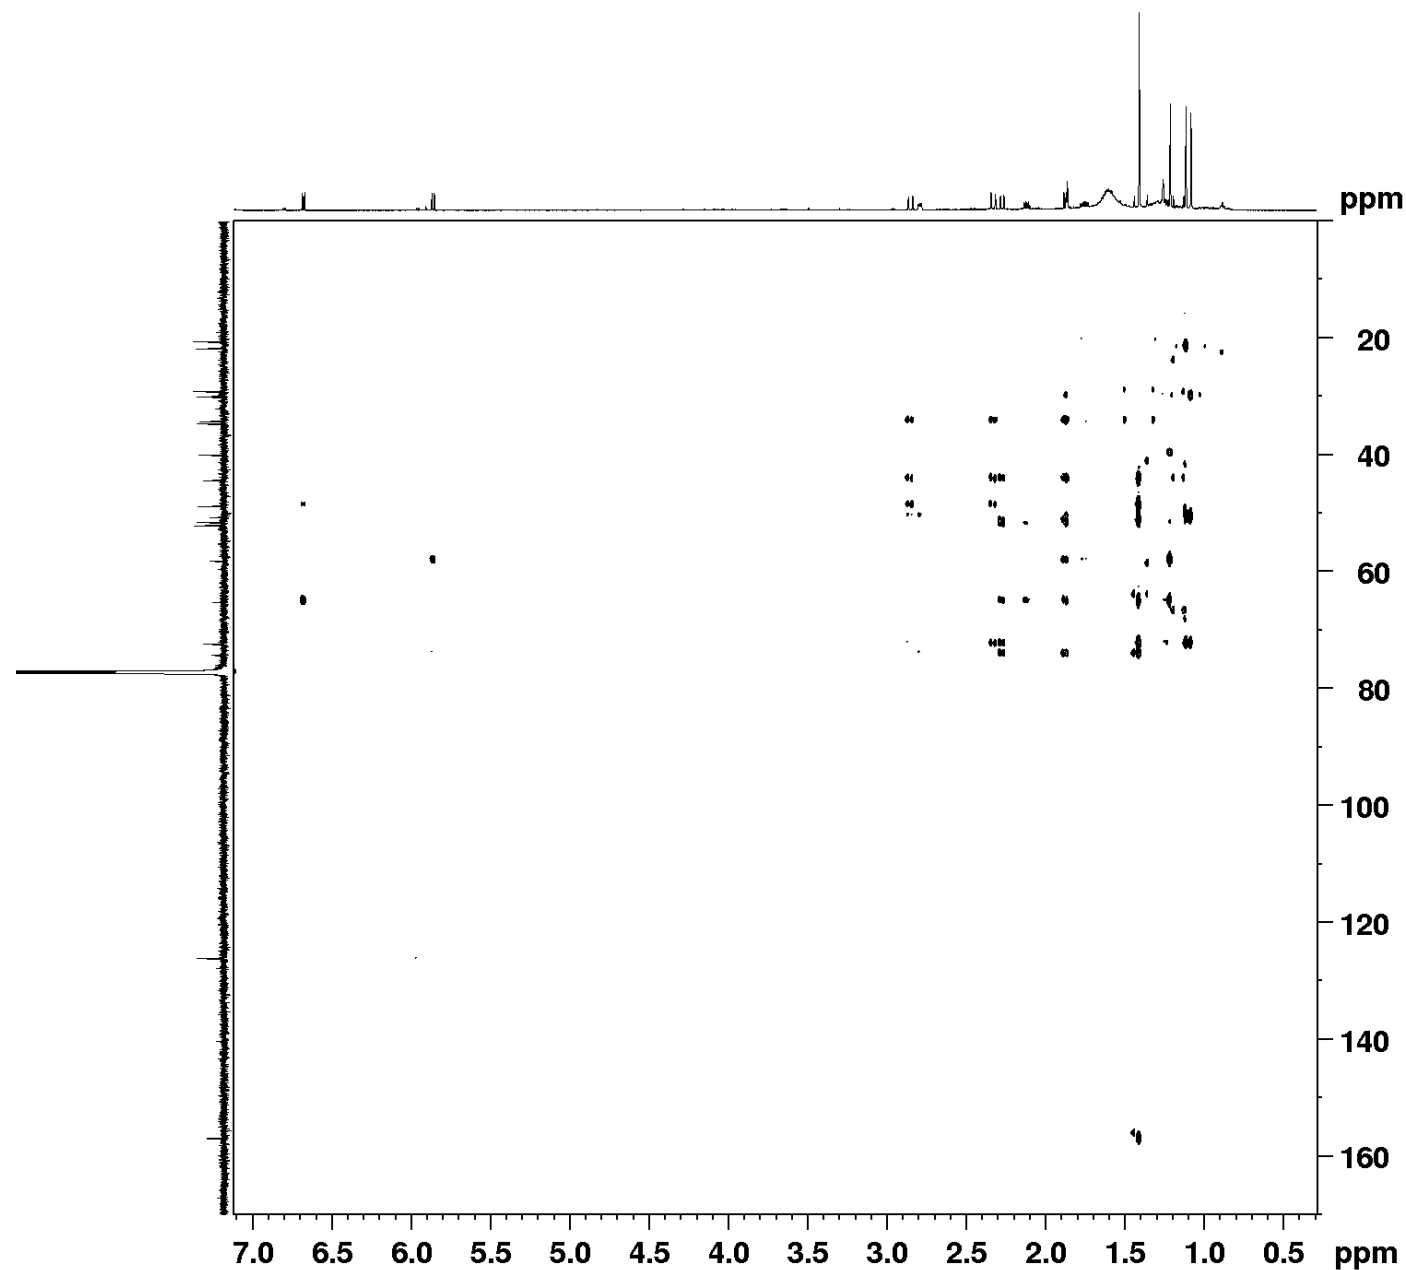

Current Data Parameters  
NAME CF-60ch  
EXPNO 26  
PROCNO 1

F2 - Acquisition Parameters  
Date\_ 20220606  
Time 15.33 h  
INSTRUM spect  
PROBHD Z134216\_0006 (  
PULPROG hmbcgp1ndqf  
TD 4096  
SOLVENT CDCl3  
NS 256  
DS 16  
SWH 4783.163 Hz  
FIDRES 2.335529 Hz  
AQ 0.4281685 sec  
RG 191.01  
DW 104.533 usec  
DE 6.50 usec  
TE 303.0 K  
CNST2 145.0000000  
CNST13 5.0000000  
D0 0.00000300 sec  
D1 2.00000000 sec  
D2 0.00344828 sec  
D6 0.10000000 sec  
D16 0.00020000 sec  
IN0 0.00001180 sec  
SPARSELI 0  
TDav 1  
SFO1 700.0026103 MHz  
NUC1 1H  
P1 16.00 usec  
P2 32.00 usec  
PLW1 11.27900028 W  
SFO2 176.0362608 MHz  
NUC2 13C  
P3 12.00 usec  
PLW2 61.49700165 W  
GPNAM[1] SMSQ10.100  
GPZ1 50.00 %  
GPNAM[2] SMSQ10.100  
GPZ2 30.00 %  
GPNAM[3] SMSQ10.100  
GPZ3 40.10 %  
P16 1000.00 usec

F1 - Acquisition parameters  
TD 104  
SFO1 176.0363 MHz  
FIDRES 814.863098 Hz  
SW 240.705 ppm  
EnMODE QF

F2 - Processing parameters  
SI 2048  
SF 700.0000180 MHz  
WDW SINE  
SSB 3  
LB 0 Hz  
GB 0  
PC 4.00

F1 - Processing parameters  
SI 512  
MC2 QF  
SF 176.0151390 MHz  
WDW SINE  
SSB 0  
LB 0 Hz  
GB 0

Figure S6.  $^1\text{H}$ - $^1\text{H}$  COSY NMR spectrum (700 MHz,  $\text{CDCl}_3$ ) of **1**

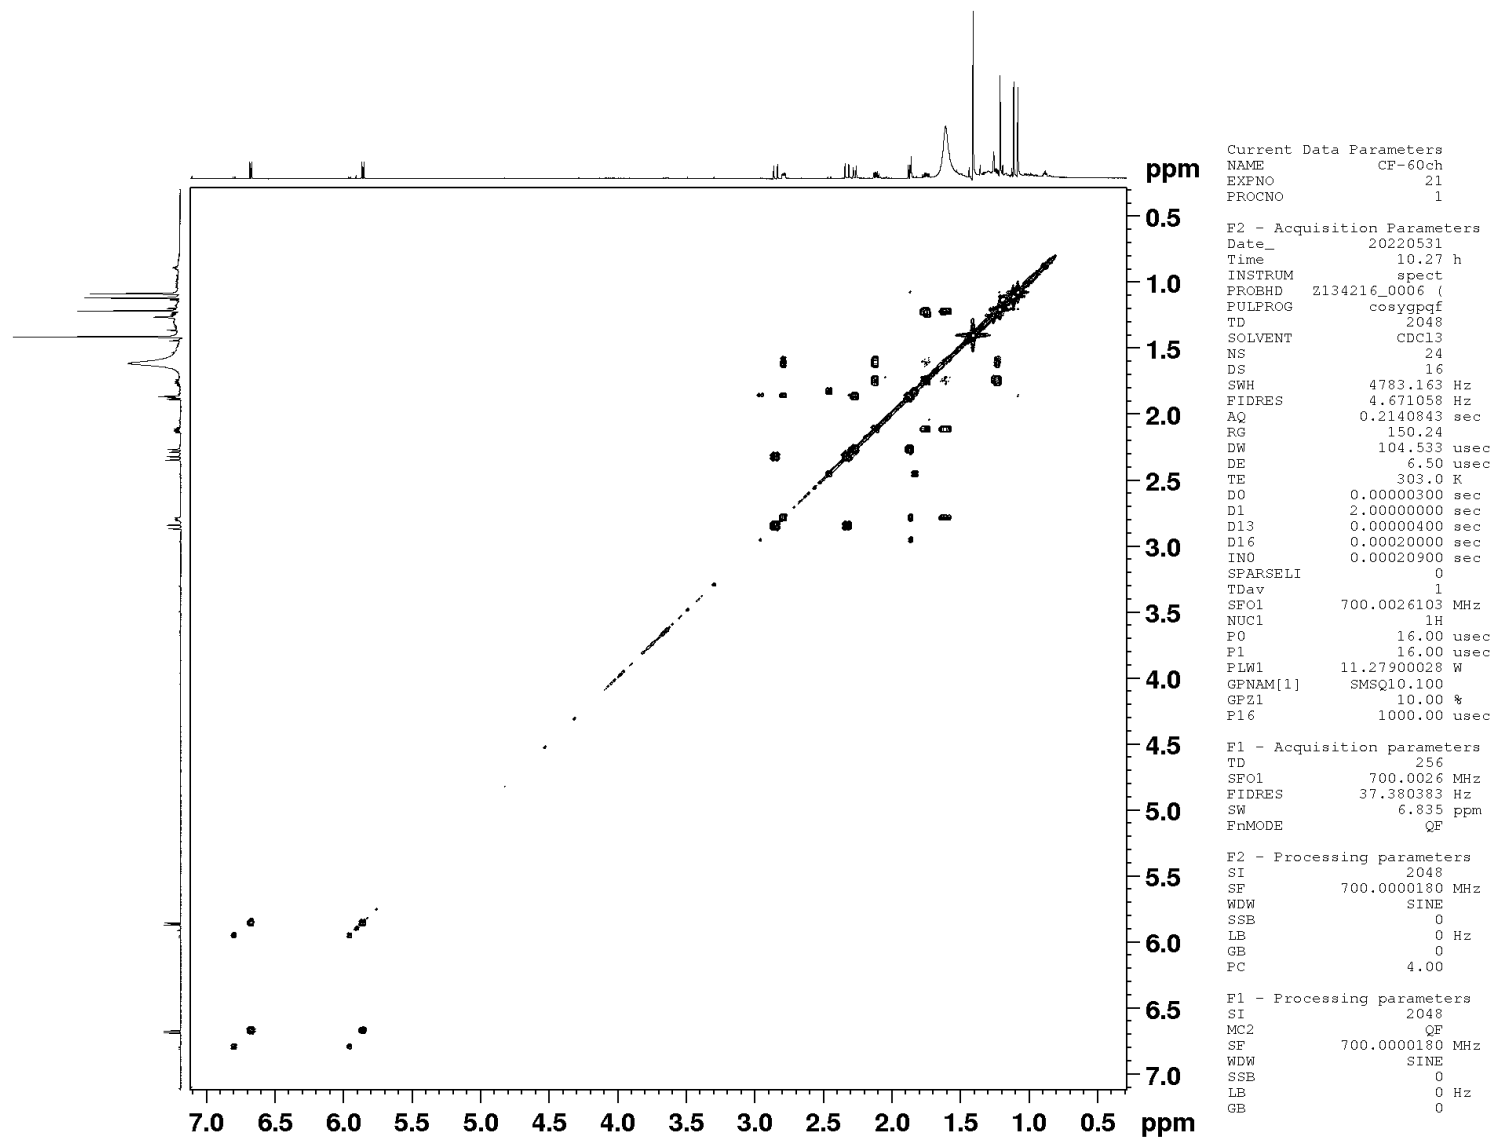

Figure S7. ROESY NMR spectrum (700 MHz, CDCl<sub>3</sub>) of **1**

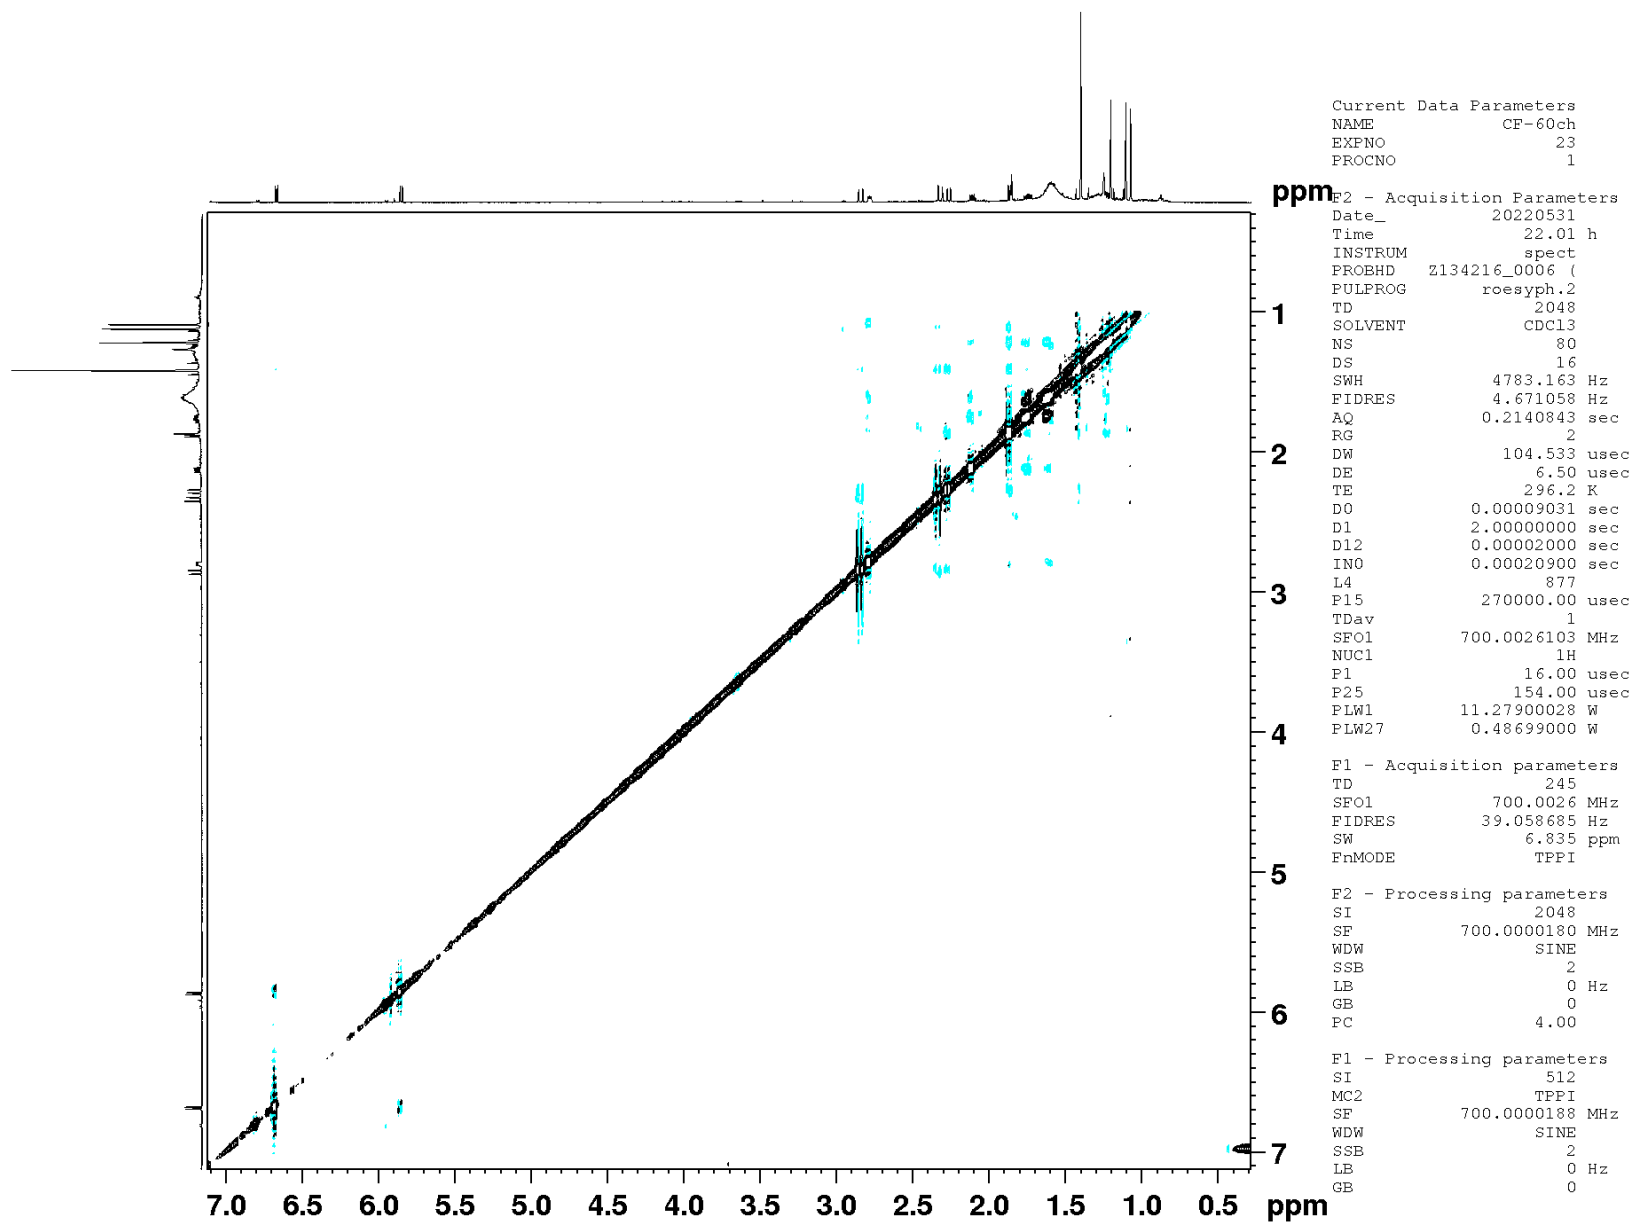

Figure S8.  $^1\text{H}$  NMR spectrum (700 MHz,  $\text{CDCl}_3$ ) of **2**

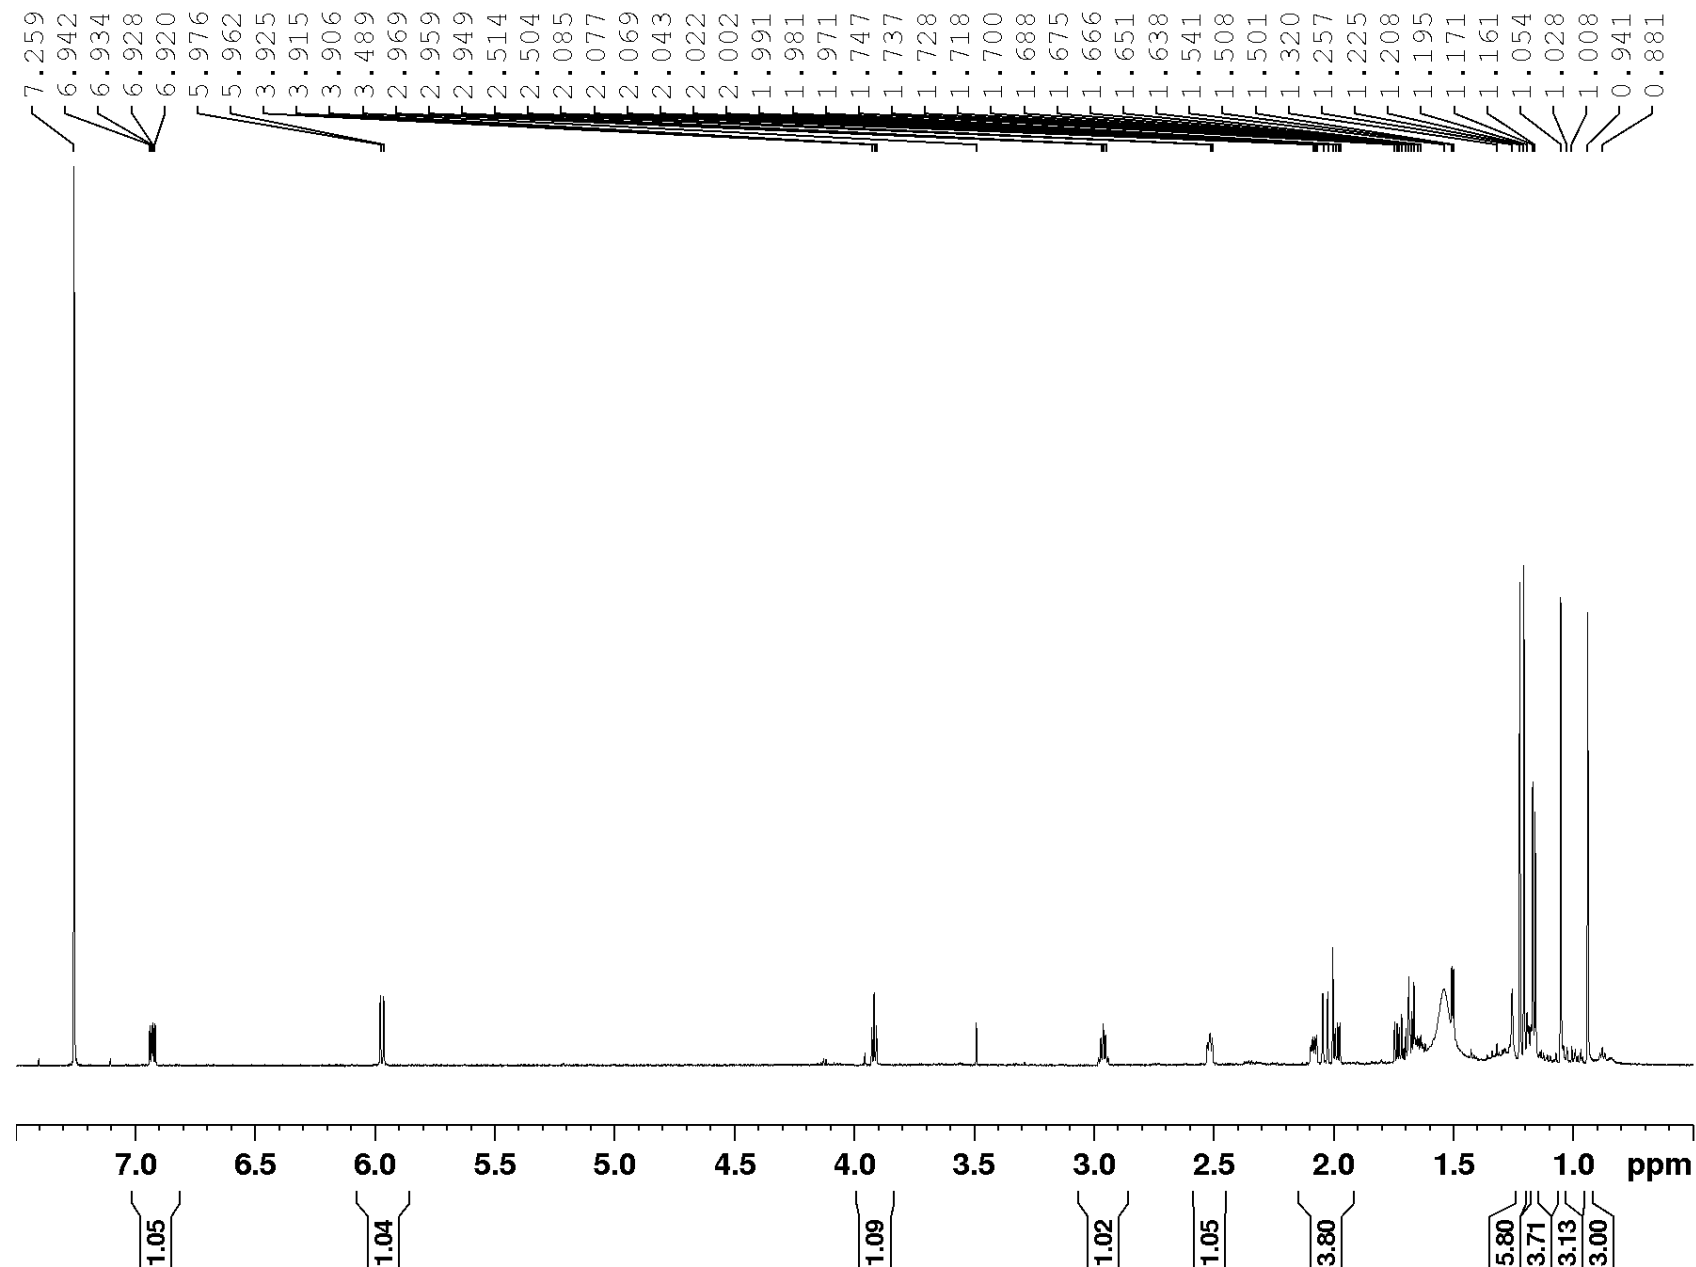

Current Data Parameters  
 NAME Och-67ch  
 EXPNO 2  
 PROCNO 1

F2 - Acquisition Parameters  
 Date\_ 20220628  
 Time 16.33 h  
 INSTRUM spect  
 PROBHD Z134216\_0006 (   
 PULPROG zg30  
 TD 32768  
 SOLVENT  $\text{CDCl}_3$   
 NS 8  
 DS 2  
 SWH 10504.202 Hz  
 FIDRES 0.641126 Hz  
 AQ 1.5597568 sec  
 RG 165.68  
 DW 47.600 usec  
 DE 6.50 usec  
 TE 302.9 K  
 D1 2.00000000 sec  
 TD0 1  
 SFO1 700.0051100 MHz  
 NUC1  $^1\text{H}$   
 P0 5.33 usec  
 P1 16.00 usec  
 PLW1 11.27900028 W

F2 - Processing parameters  
 SI 32768  
 SF 700.0000178 MHz  
 WDW EM  
 SSB 0  
 LB 0.10 Hz  
 GB 0  
 PC 4.00

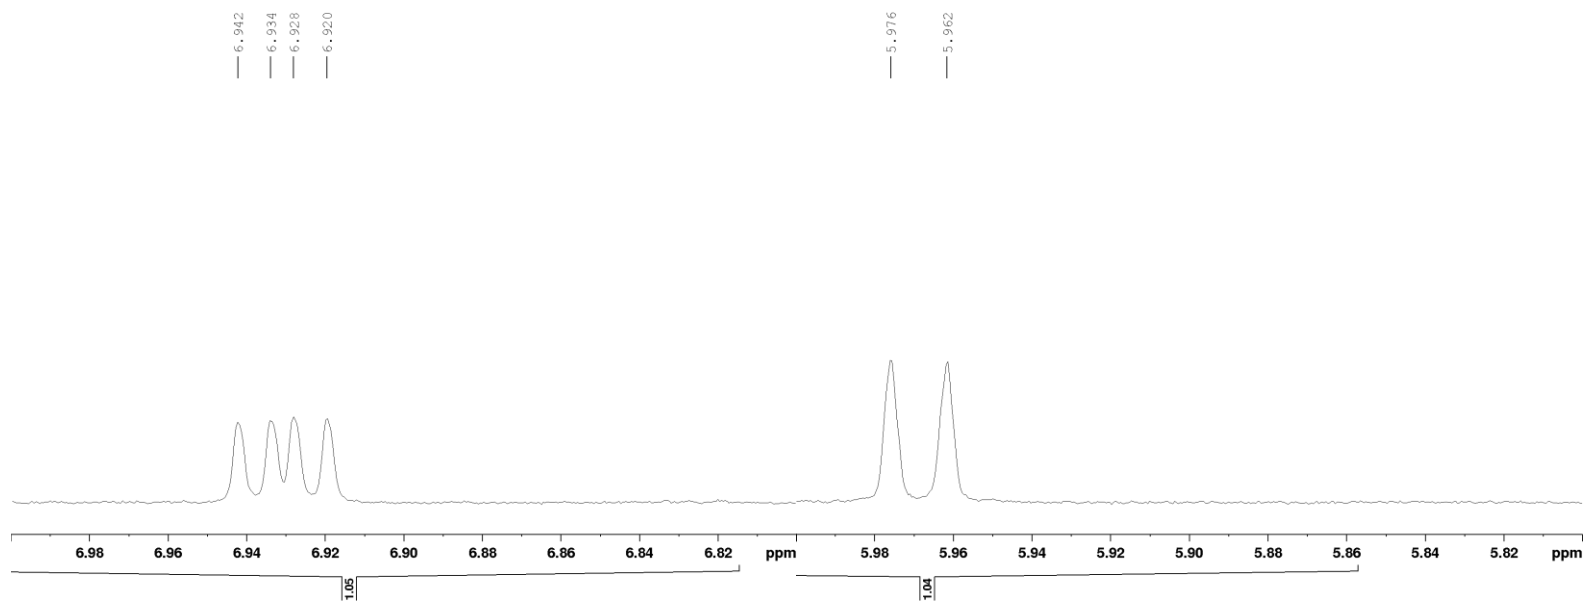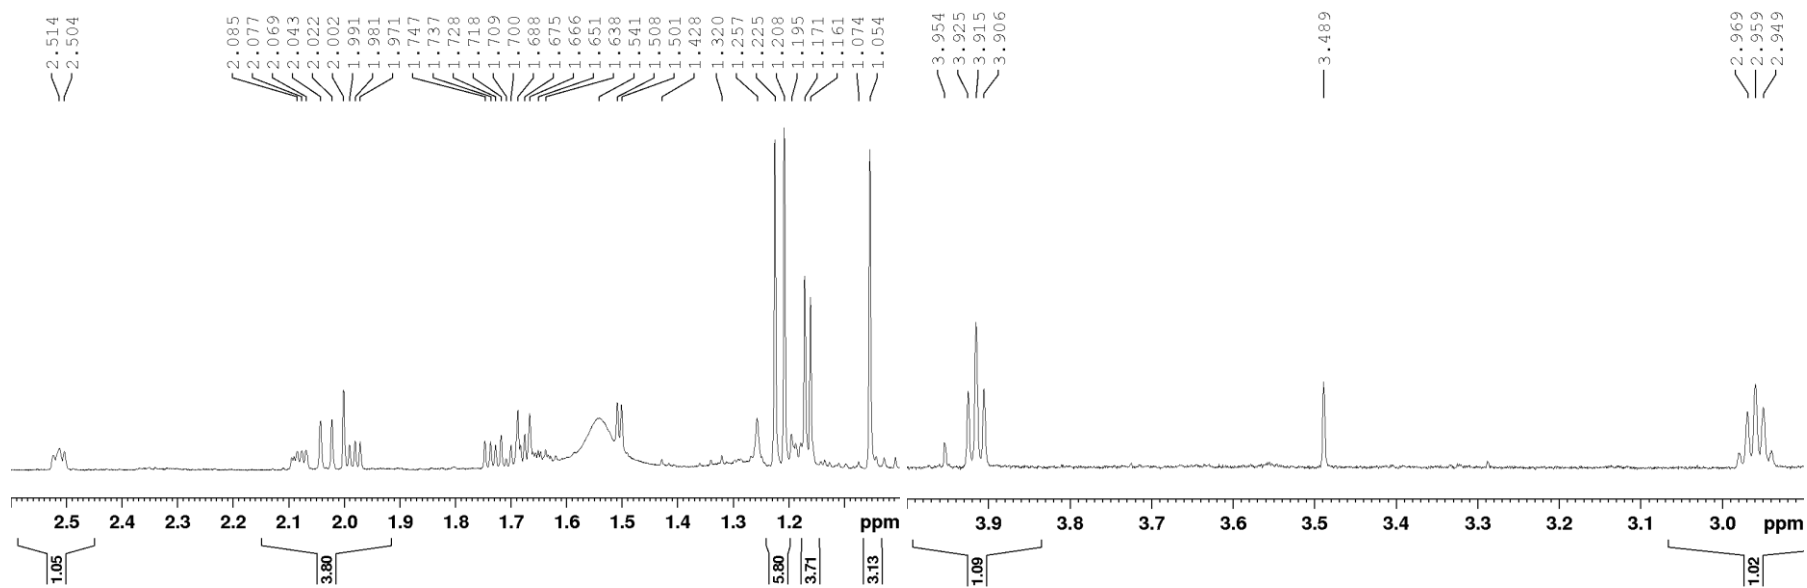

Figure S9.  $^{13}\text{C}$  NMR spectrum (125 MHz,  $\text{CDCl}_3$ ) of 2

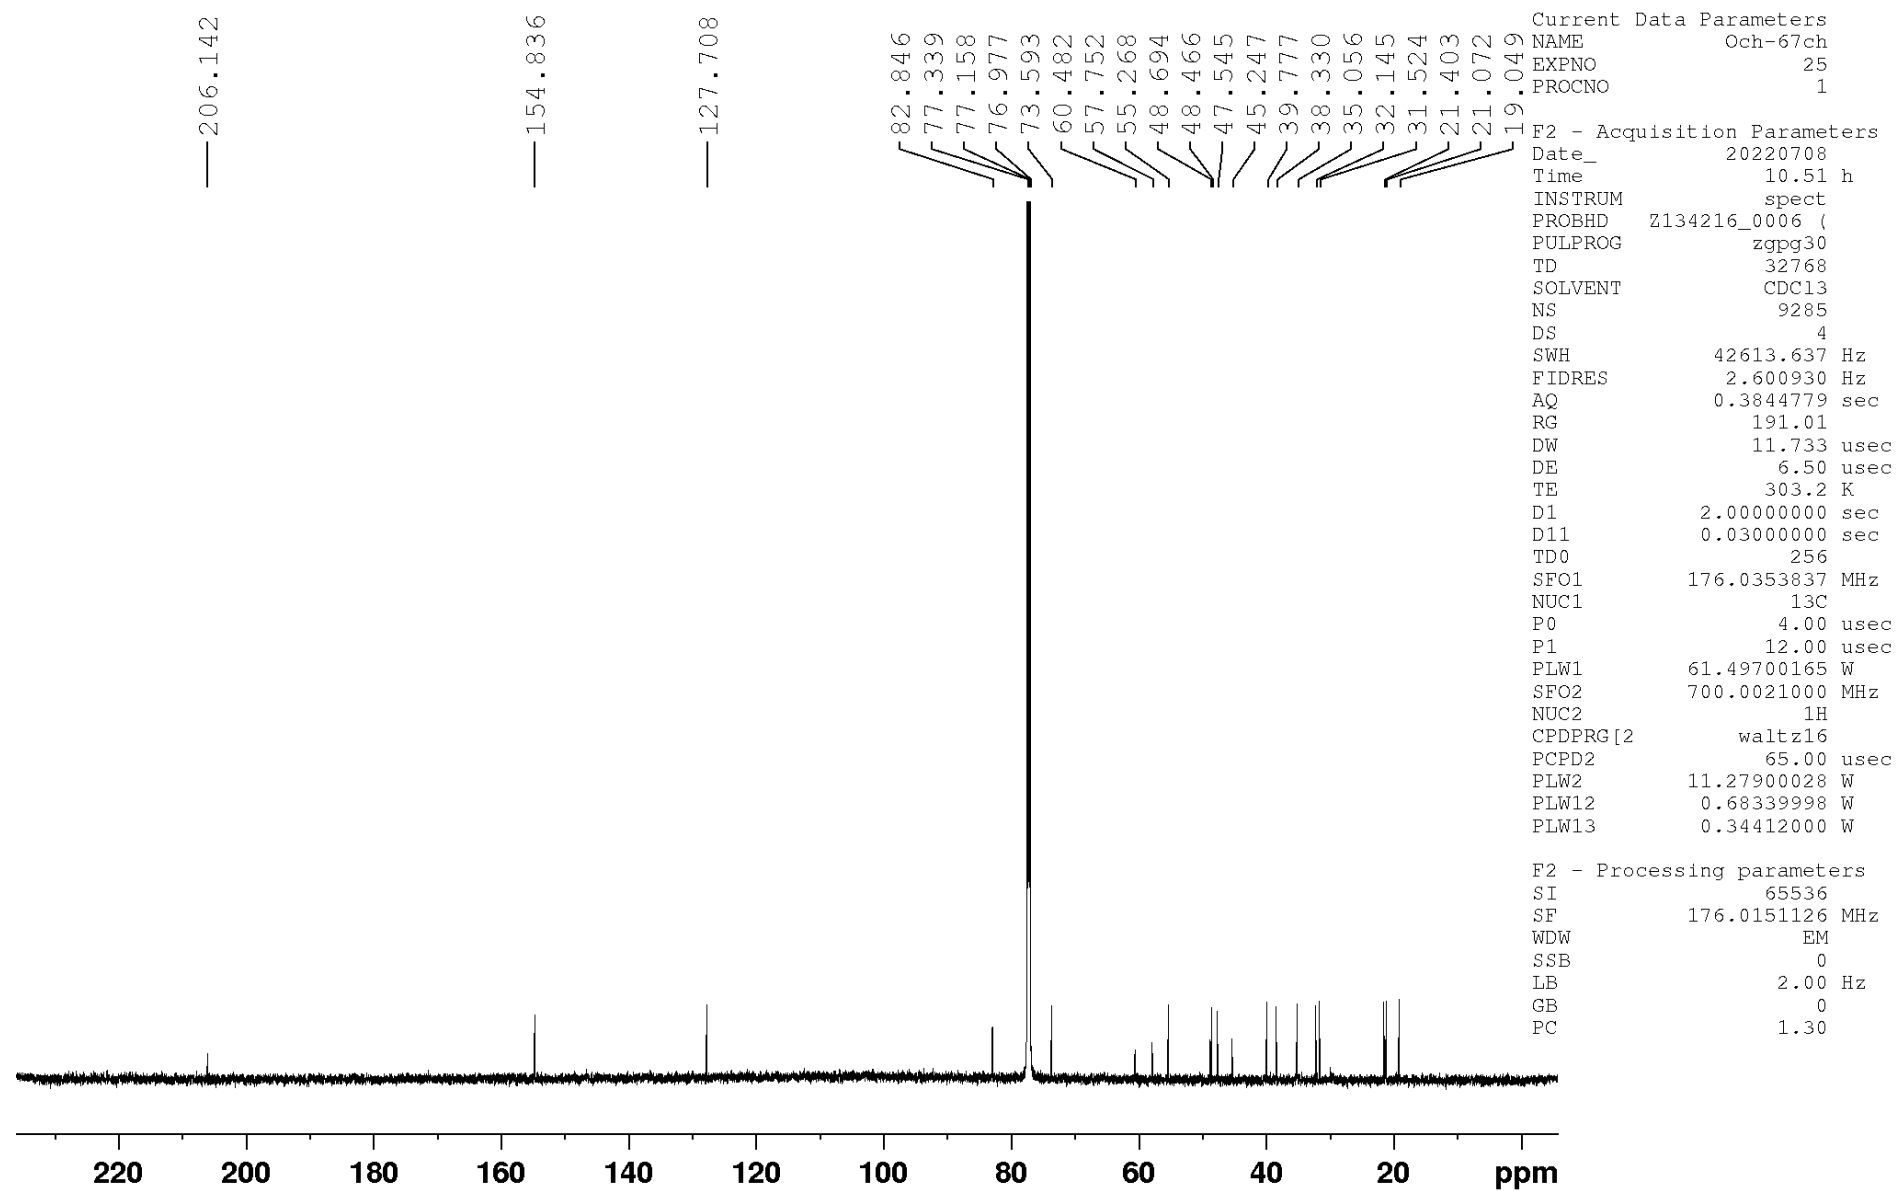

Figure S10. DEPT NMR spectrum (700 MHz, CDCl<sub>3</sub>) of 2

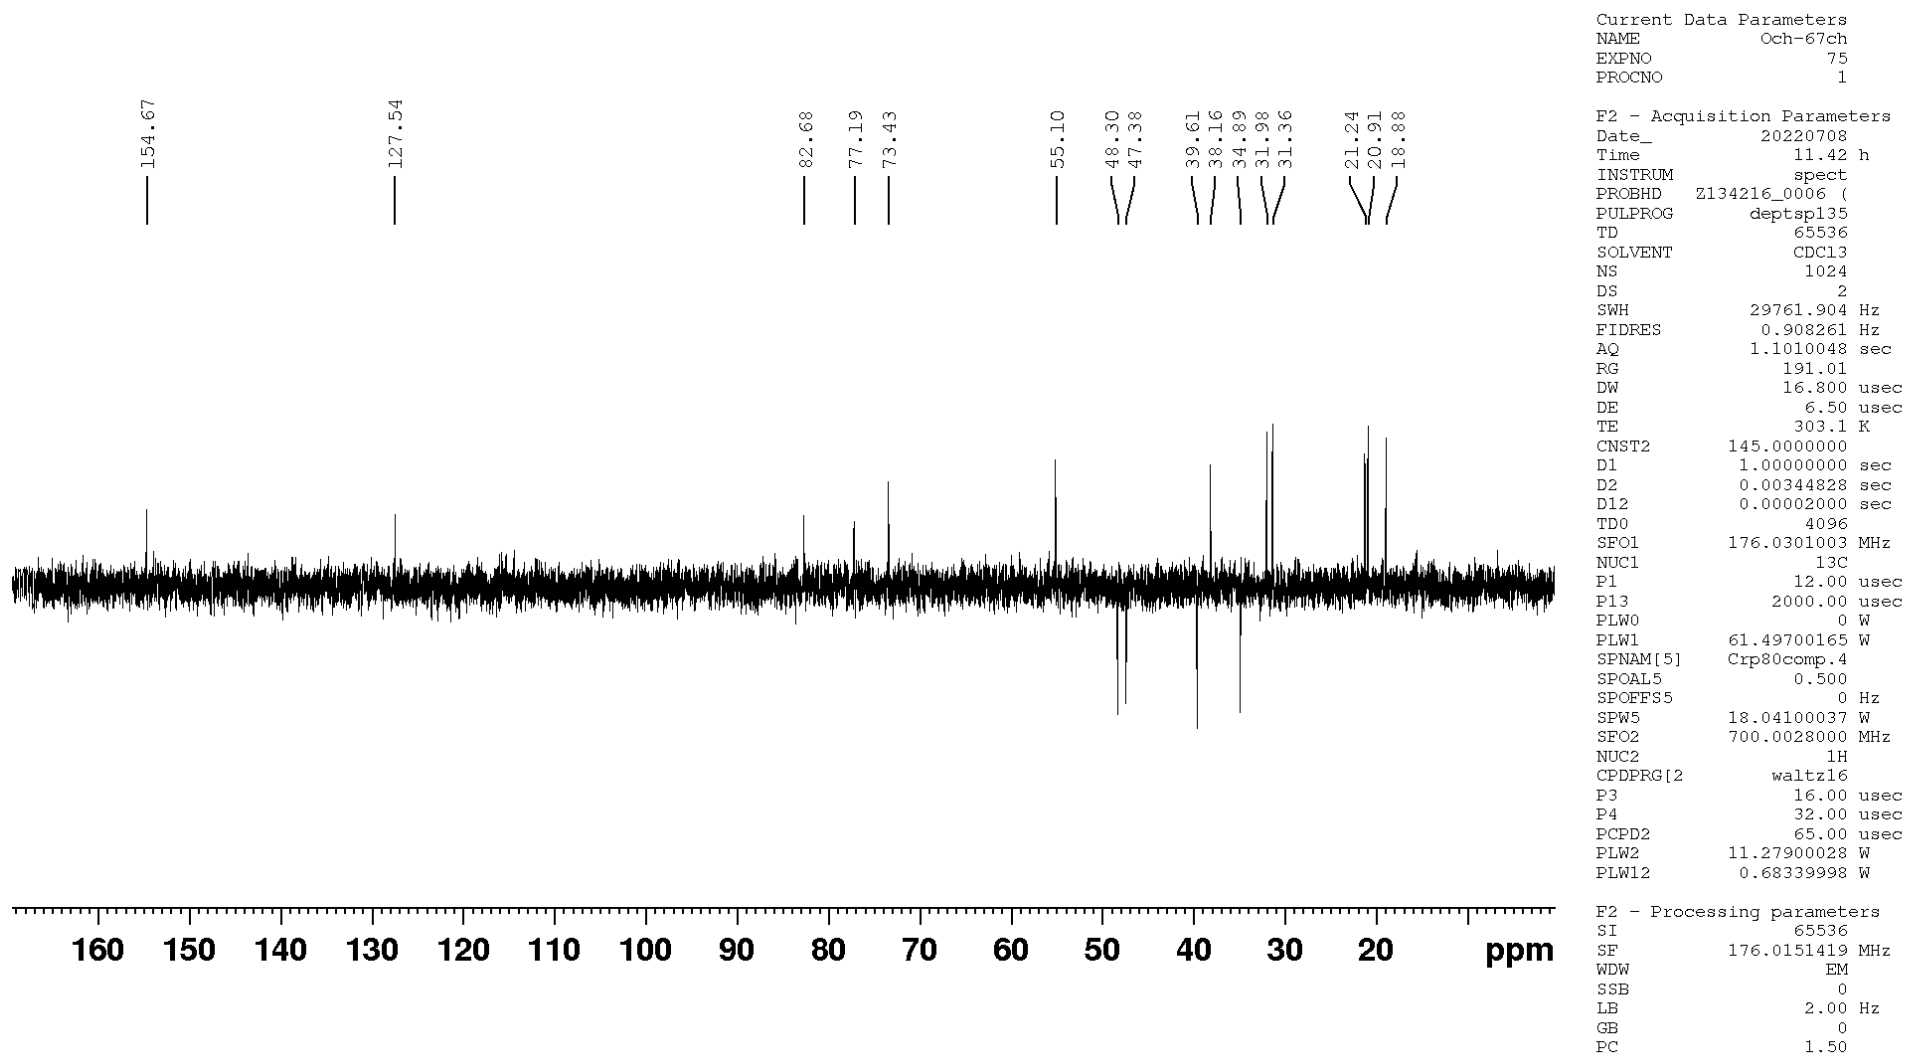

Figure S11. HSQC NMR spectrum (700 MHz, CDCl<sub>3</sub>) of 2

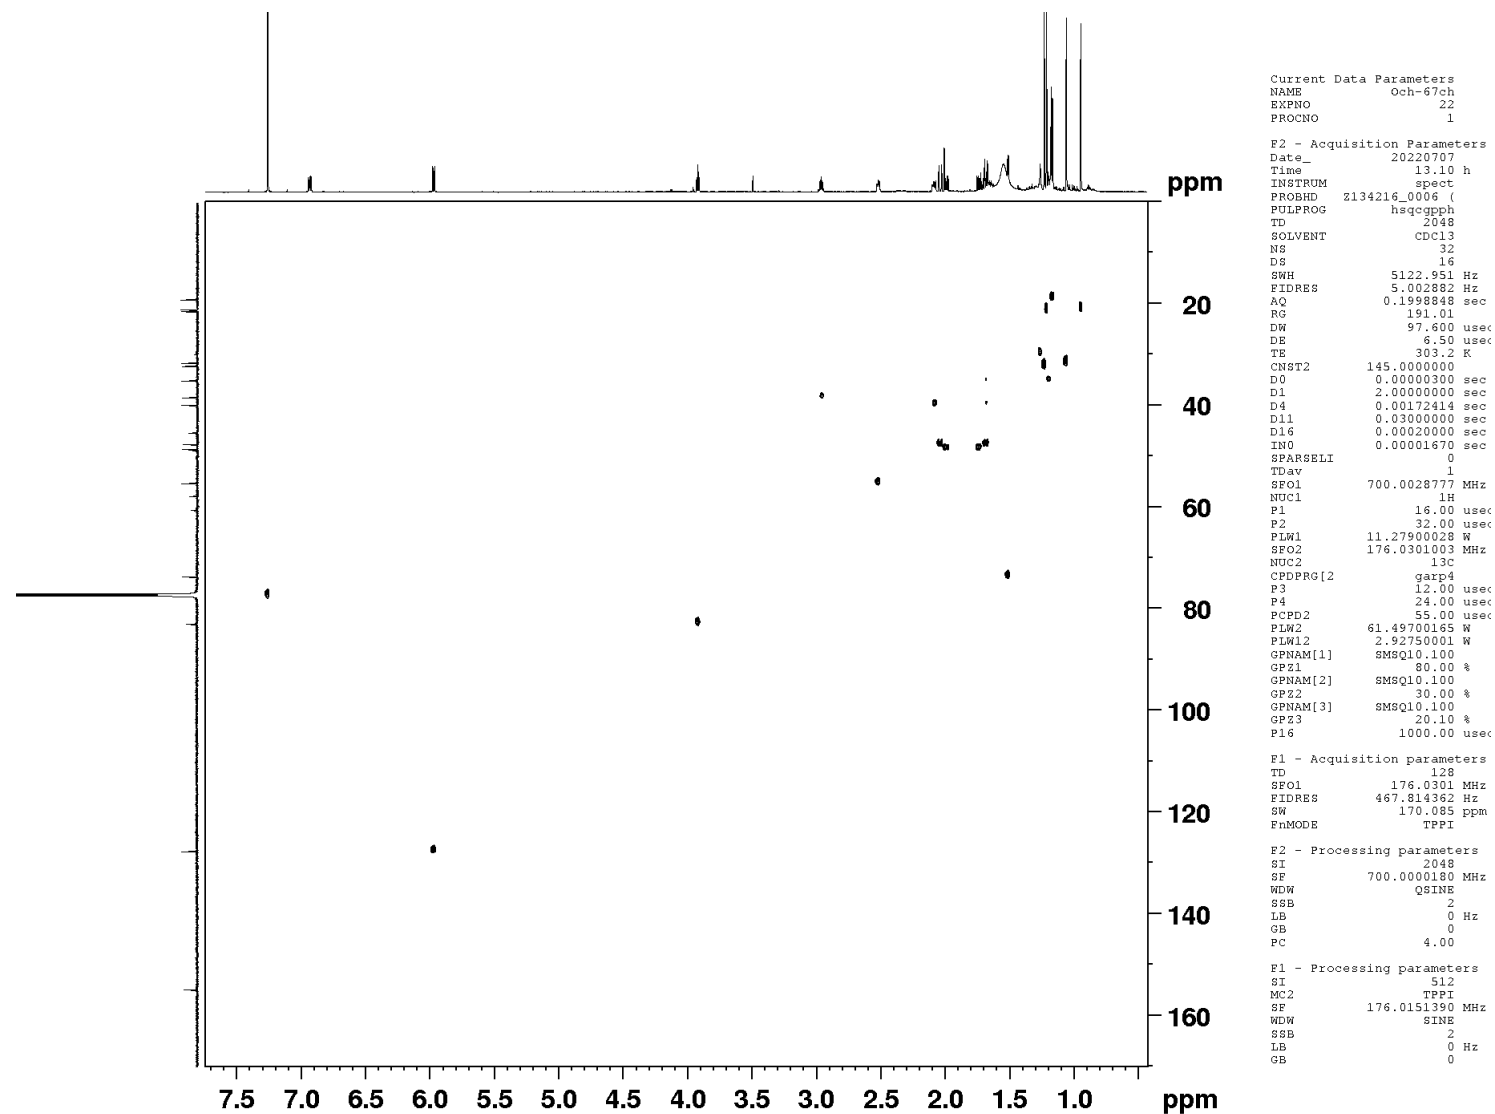



Figure S12. HMBC NMR spectrum (700 MHz, CDCl<sub>3</sub>) of 2

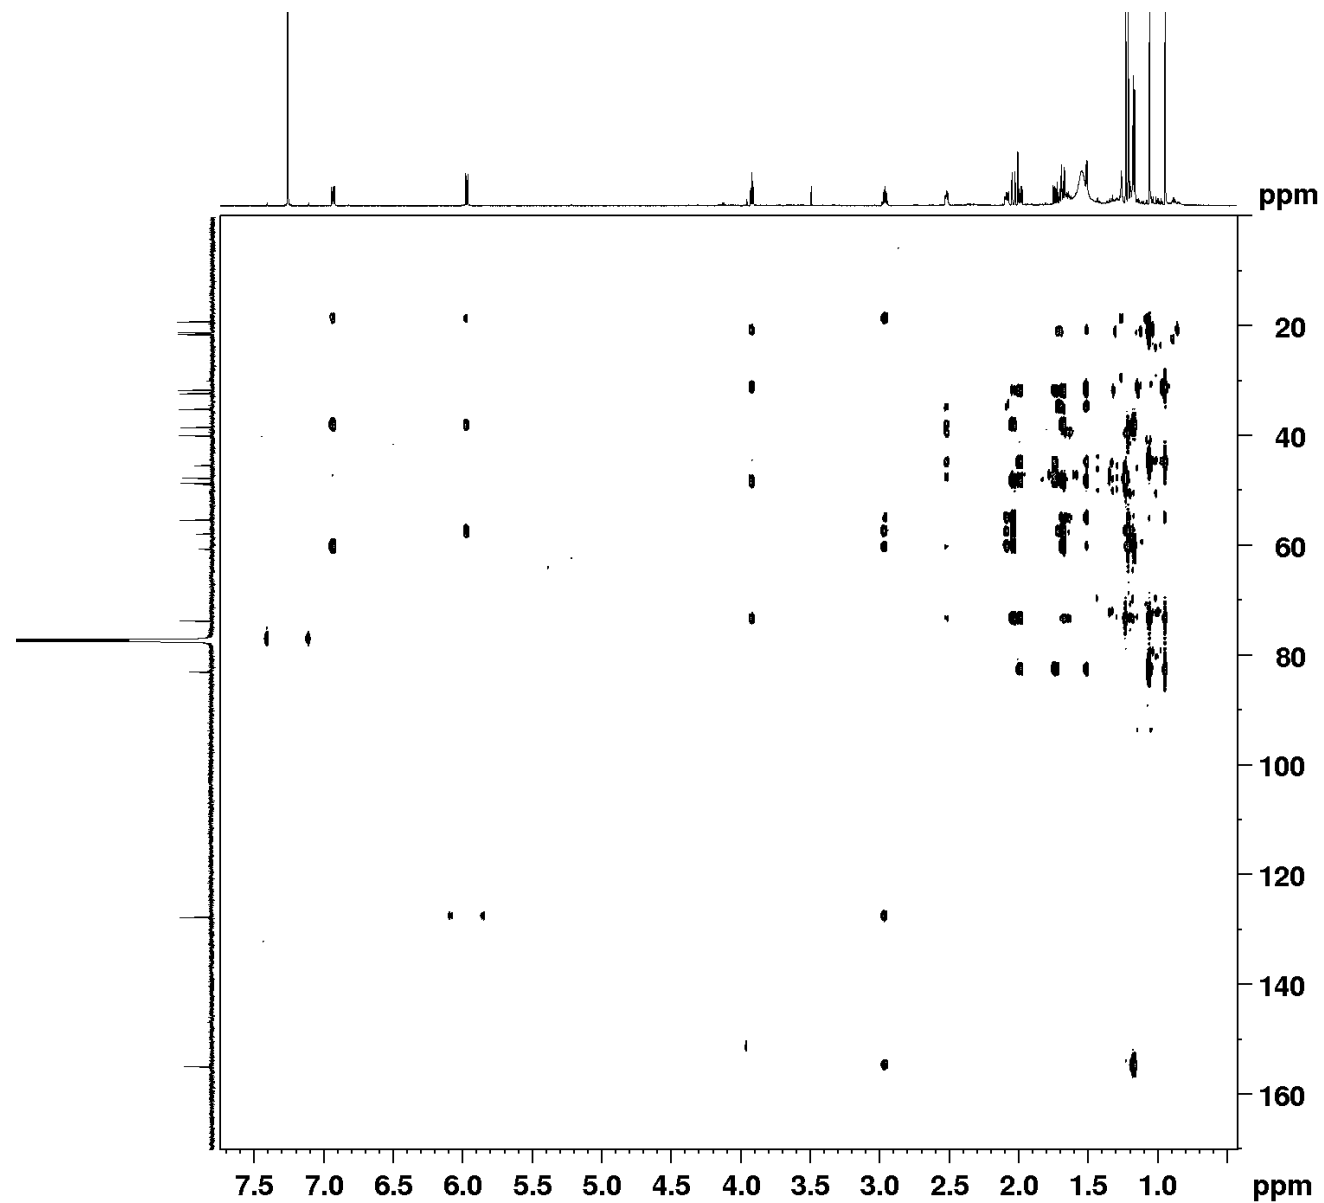

```

Current Data Parameters
NAME      Och-67ch
EXPNO     24
PROCNO    1

F2 - Acquisition Parameters
Date_     20220707
Time      21.26 h
INSTRUM   spect
PROBHD    Z134216_0006 (
PULPROG   hmbcggp1pndgdf
TD         4096
SOLVENT   CDCl3
NS         80
DS         16
SWH        5122.951 Hz
FIDRES     2.501441 Hz
AQ         0.3997696 sec
RG         191.01
DW         97.600 usec
DE         6.50 usec
TE         303.0 K
CNST2     145.0000000
CNST13    5.0000000
D0         0.00000300 sec
D1         2.00000000 sec
D2         0.00344828 sec
D6         0.10000000 sec
D16        0.00020000 sec
IN0        0.00001180 sec
SPARSELI   0
TDav       1
SFO1       700.0028777 MHz
NUC1       1H
P1         16.00 usec
P2         32.00 usec
PLW1       11.27900028 W
SFO2       176.0362608 MHz
NUC2       13C
P3         12.00 usec
PLW2       61.49700165 W
GPNAM[1]   SMSQ10.100
GPZ1       50.00 %
GPNAM[2]   SMSQ10.100
GPZ2       30.00 %
GPNAM[3]   SMSQ10.100
GPZ3       40.10 %
P16        1000.00 usec

F1 - Acquisition parameters
TD         128
SFO1       176.0363 MHz
FIDRES     662.076294 Hz
SW         240.705 ppm
FnMODE     QF

F2 - Processing parameters
SI         2048
SF         700.0000180 MHz
WDW        SINE
SSB        3
LB         0 Hz
GB         0
PC         4.00

F1 - Processing parameters
SI         512
MC2        QF
SF         176.0151390 MHz
WDW        SINE
SSB        0
LB         0 Hz
GB         0
    
```

Figure S13.  $^1\text{H}$ - $^1\text{H}$  COSY NMR spectrum (700 MHz,  $\text{CDCl}_3$ ) of 2

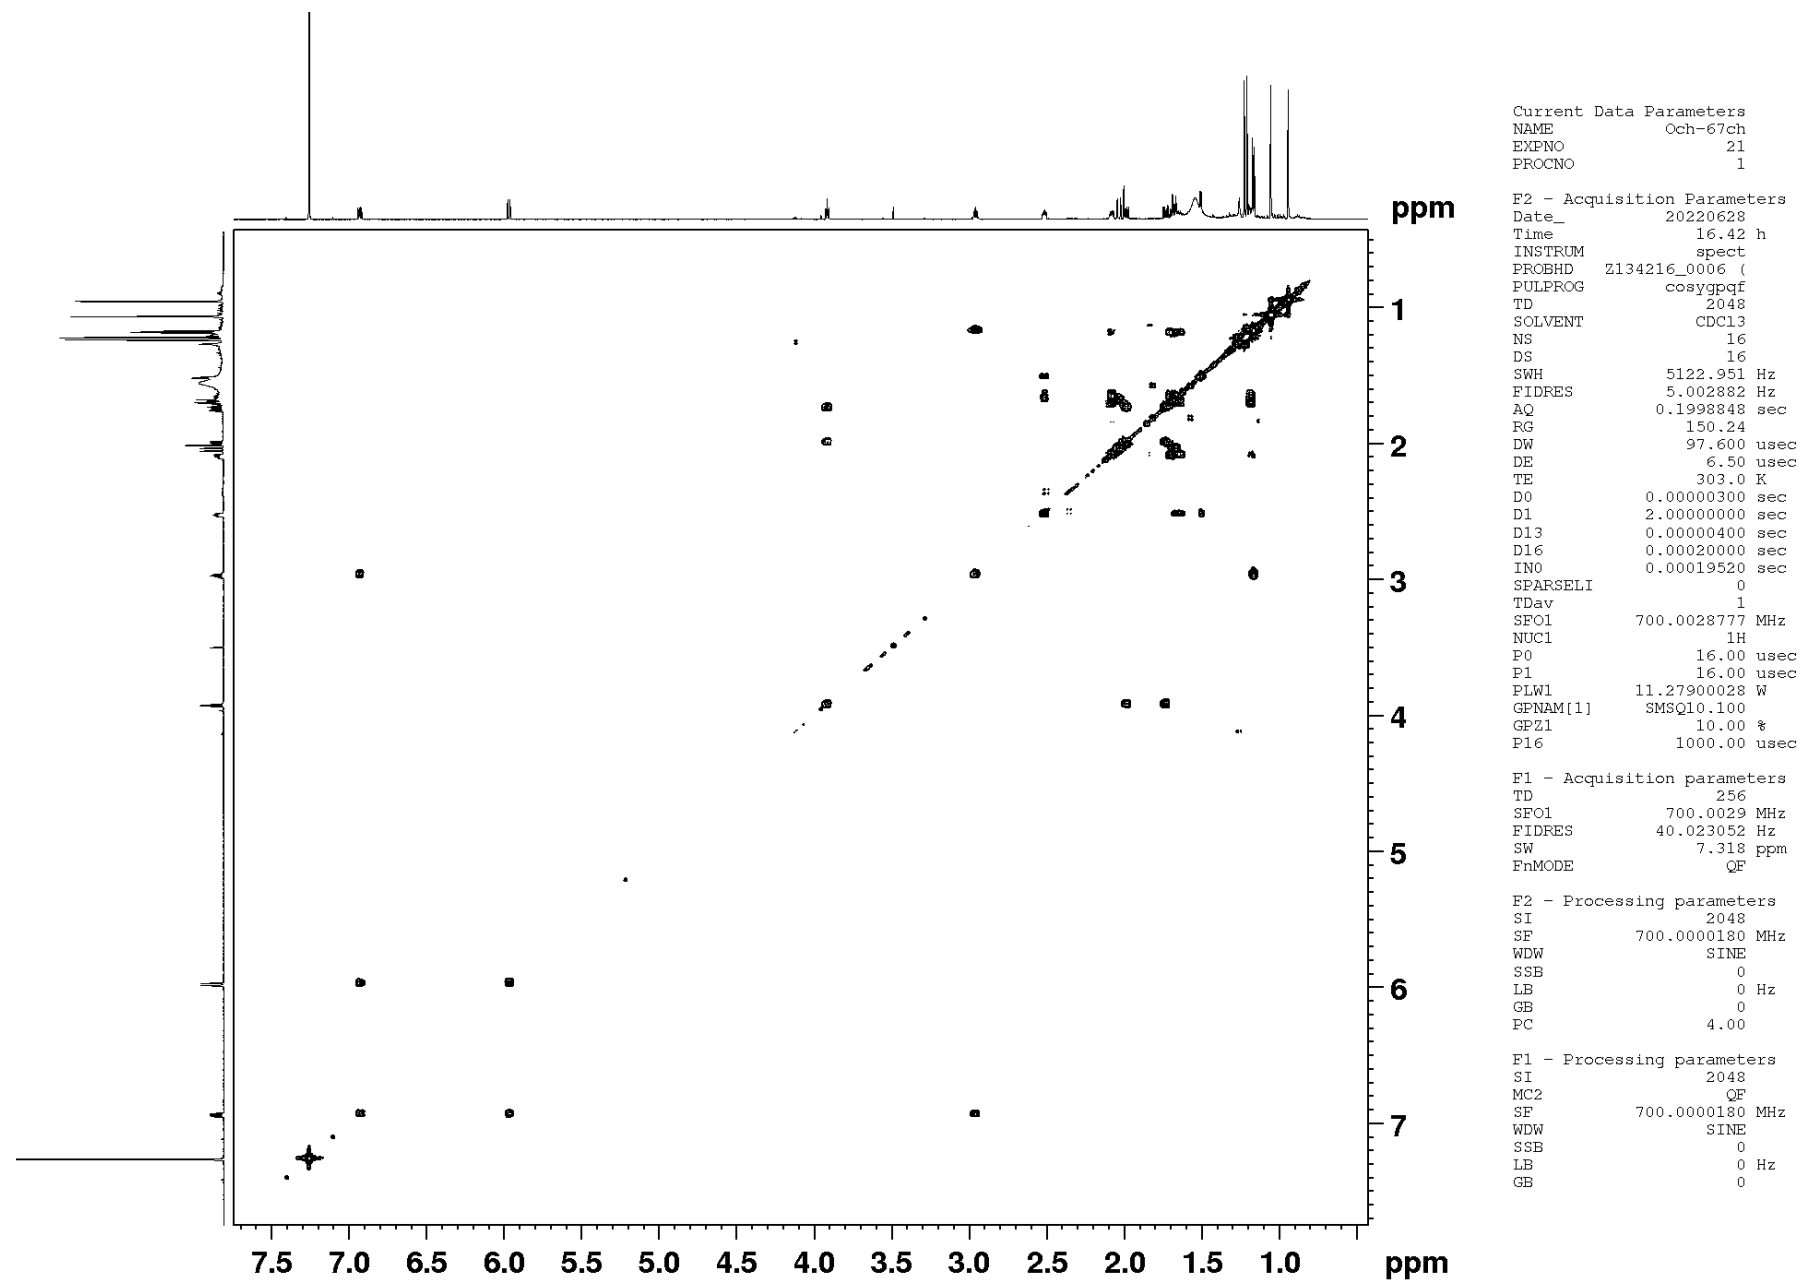

Figure S14. ROESY NMR spectrum (700 MHz, CDCl<sub>3</sub>) of 2

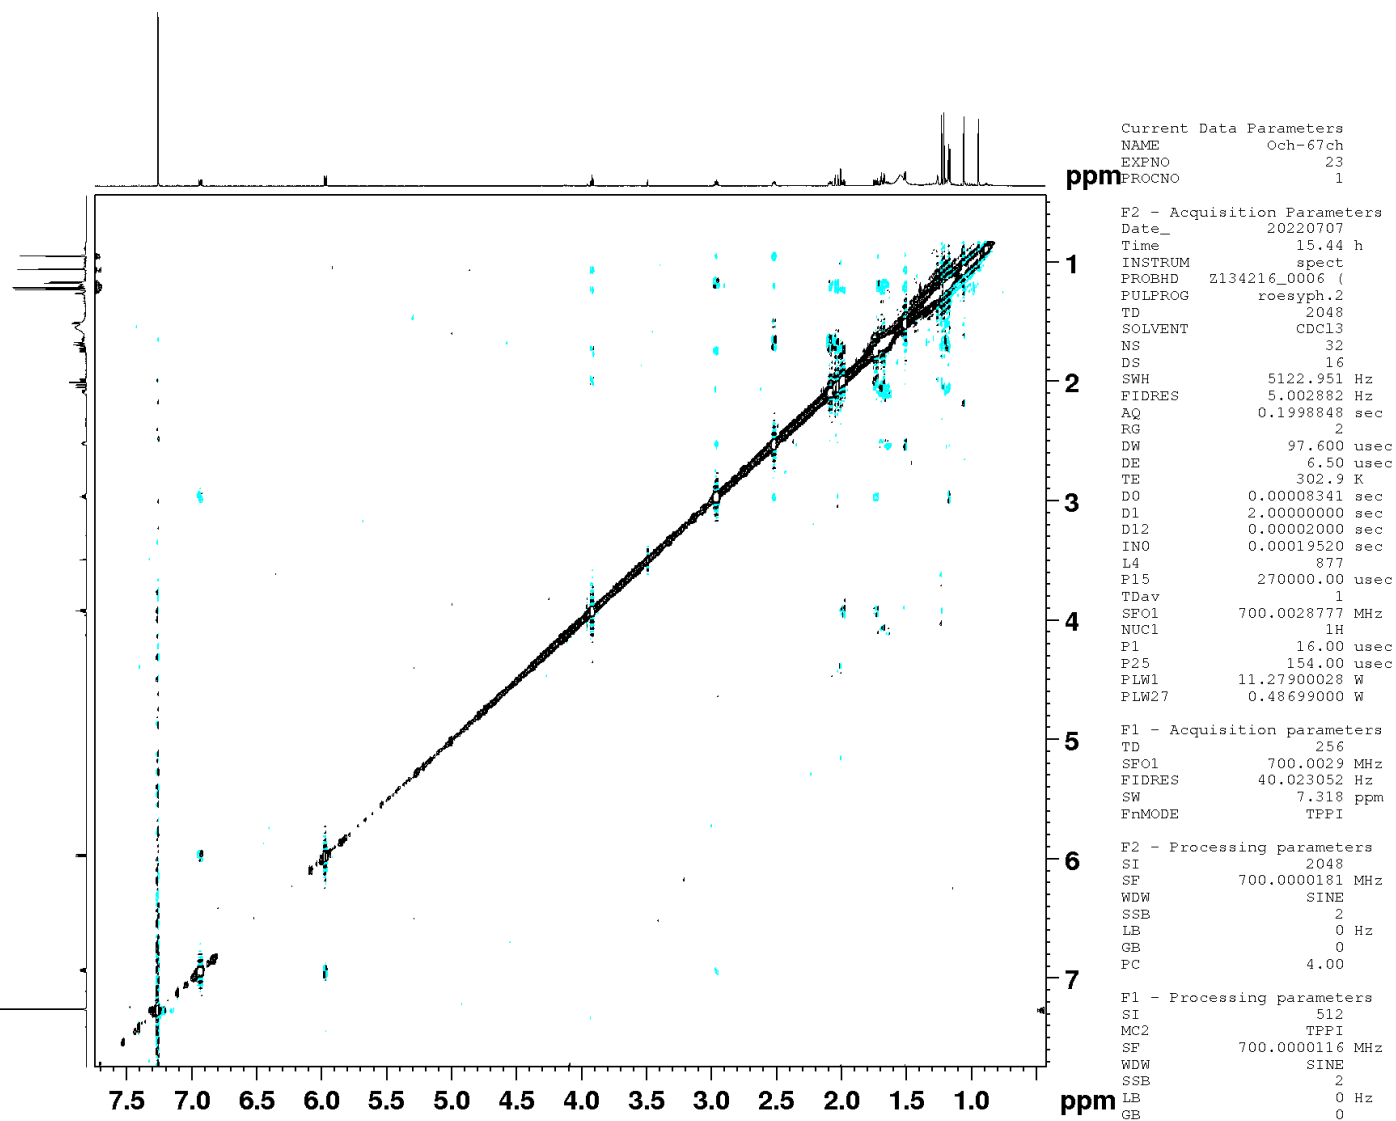

Figure S15. <sup>1</sup>H NMR spectrum (700 MHz, CDCl<sub>3</sub>) of 3

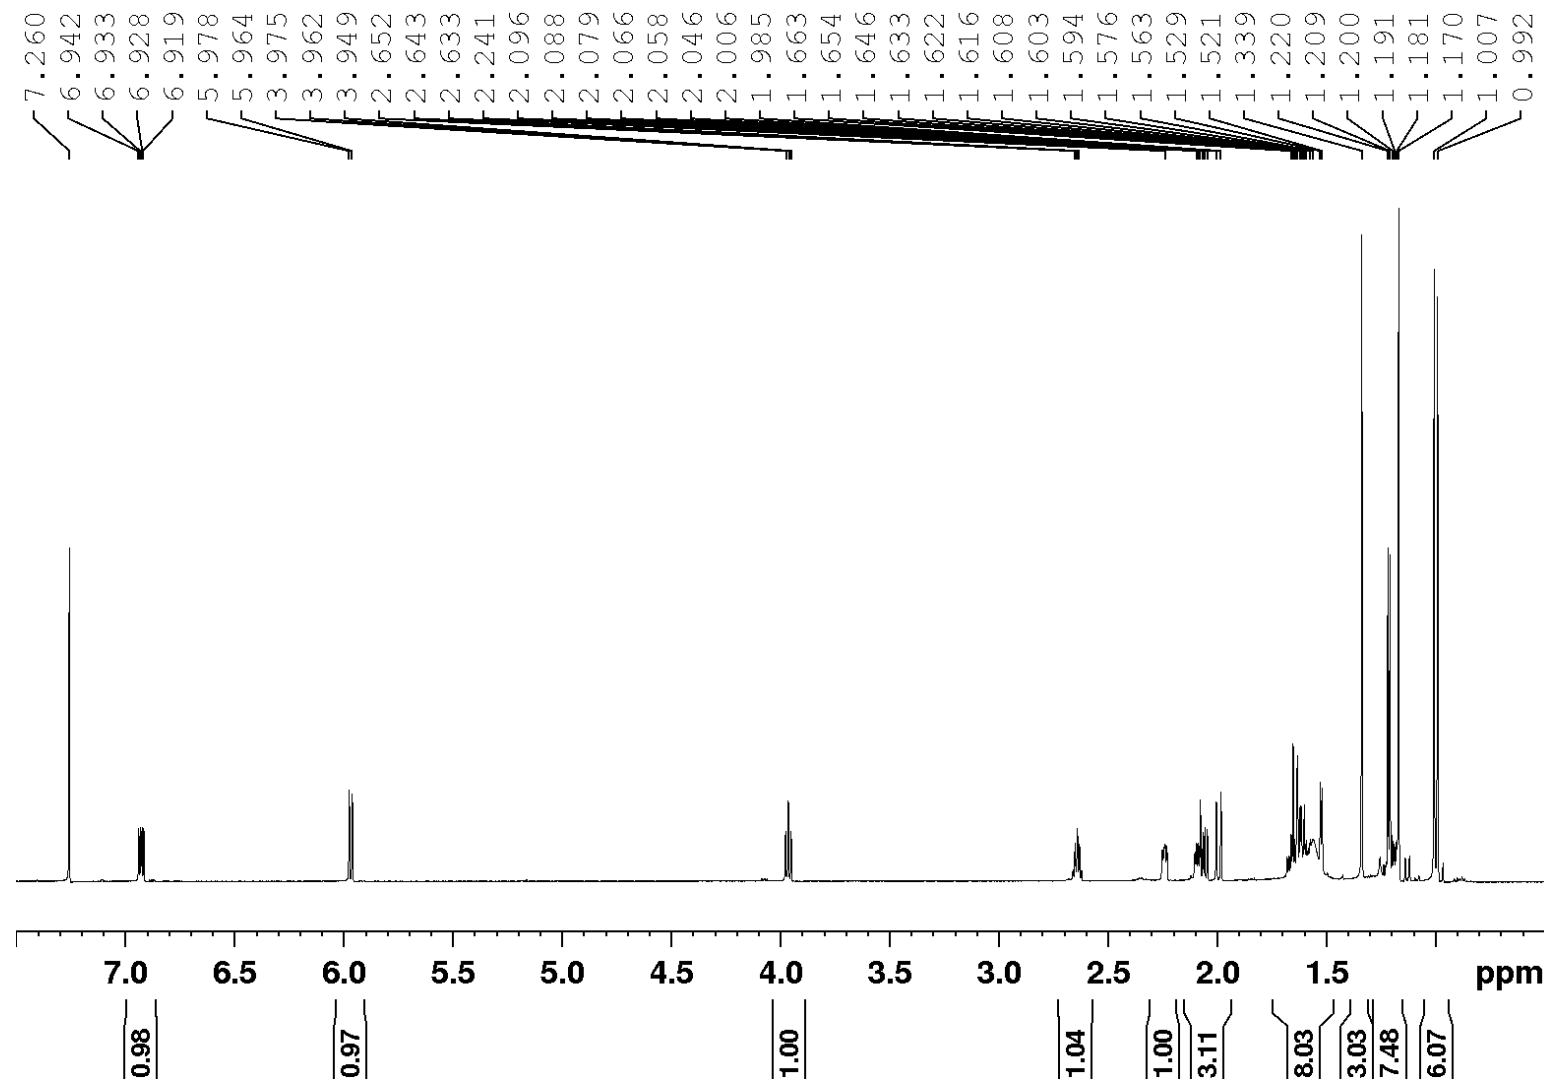

Current Data Parameters

NAME Och-62ch  
EXPNO 2  
PROCNO 1

F2 - Acquisition Parameters

Date\_ 20220520  
Time 9.47 h  
INSTRUM spect  
PROBHD Z134216\_0006 (  
PULPROG zg30  
TD 32768  
SOLVENT CDCl<sub>3</sub>  
NS 4  
DS 2  
SWH 10504.202 Hz  
FIDRES 0.641126 Hz  
AQ 1.5597568 sec  
RG 165.68  
DW 47.600 usec  
DE 6.50 usec  
TE 303.0 K  
D1 2.00000000 sec  
TD0 1  
SFO1 700.0051100 MHz  
NUC1 1H  
P0 5.33 usec  
P1 16.00 usec  
PLW1 11.27900028 W

F2 - Processing parameters

SI 32768  
SF 700.0000162 MHz  
WDW EM  
SSB 0  
LB 0.10 Hz  
GB 0  
PC 4.00

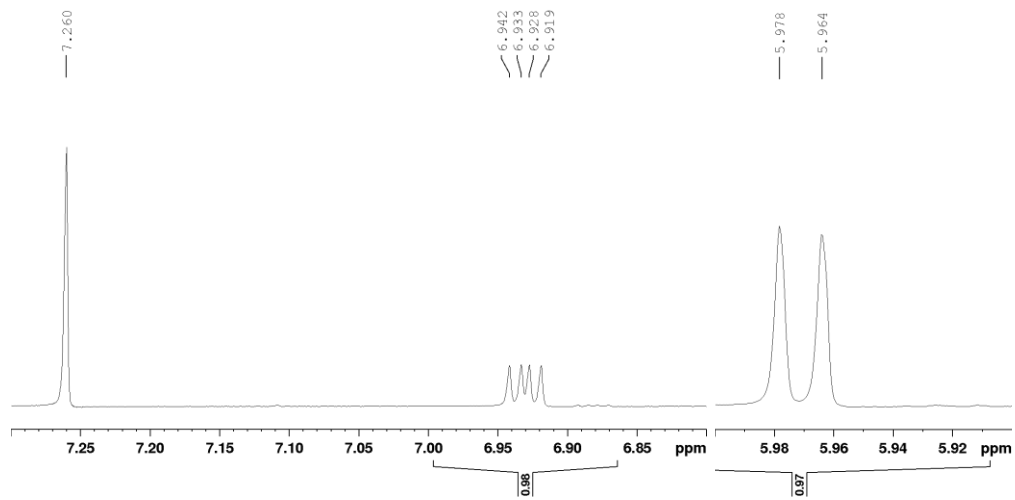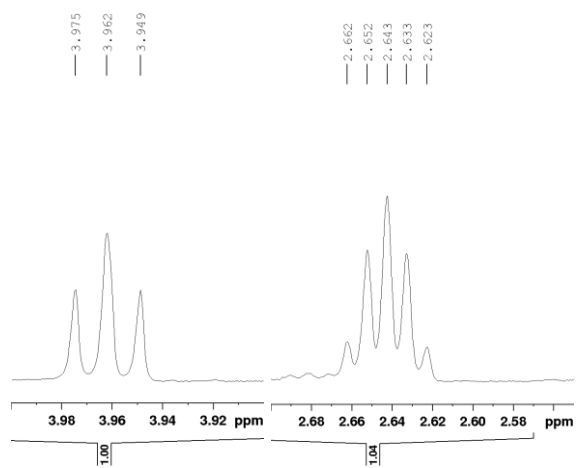

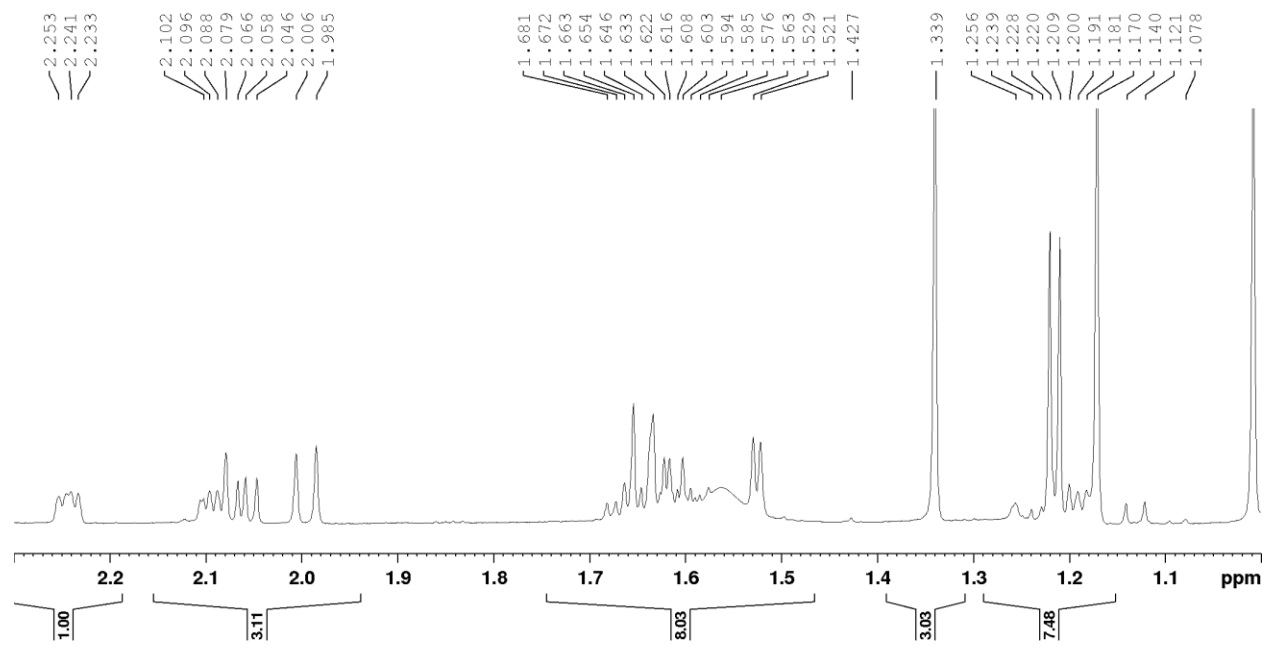

Figure S16.  $^{13}\text{C}$  NMR spectrum (700 MHz,  $\text{CDCl}_3$ ) of 3

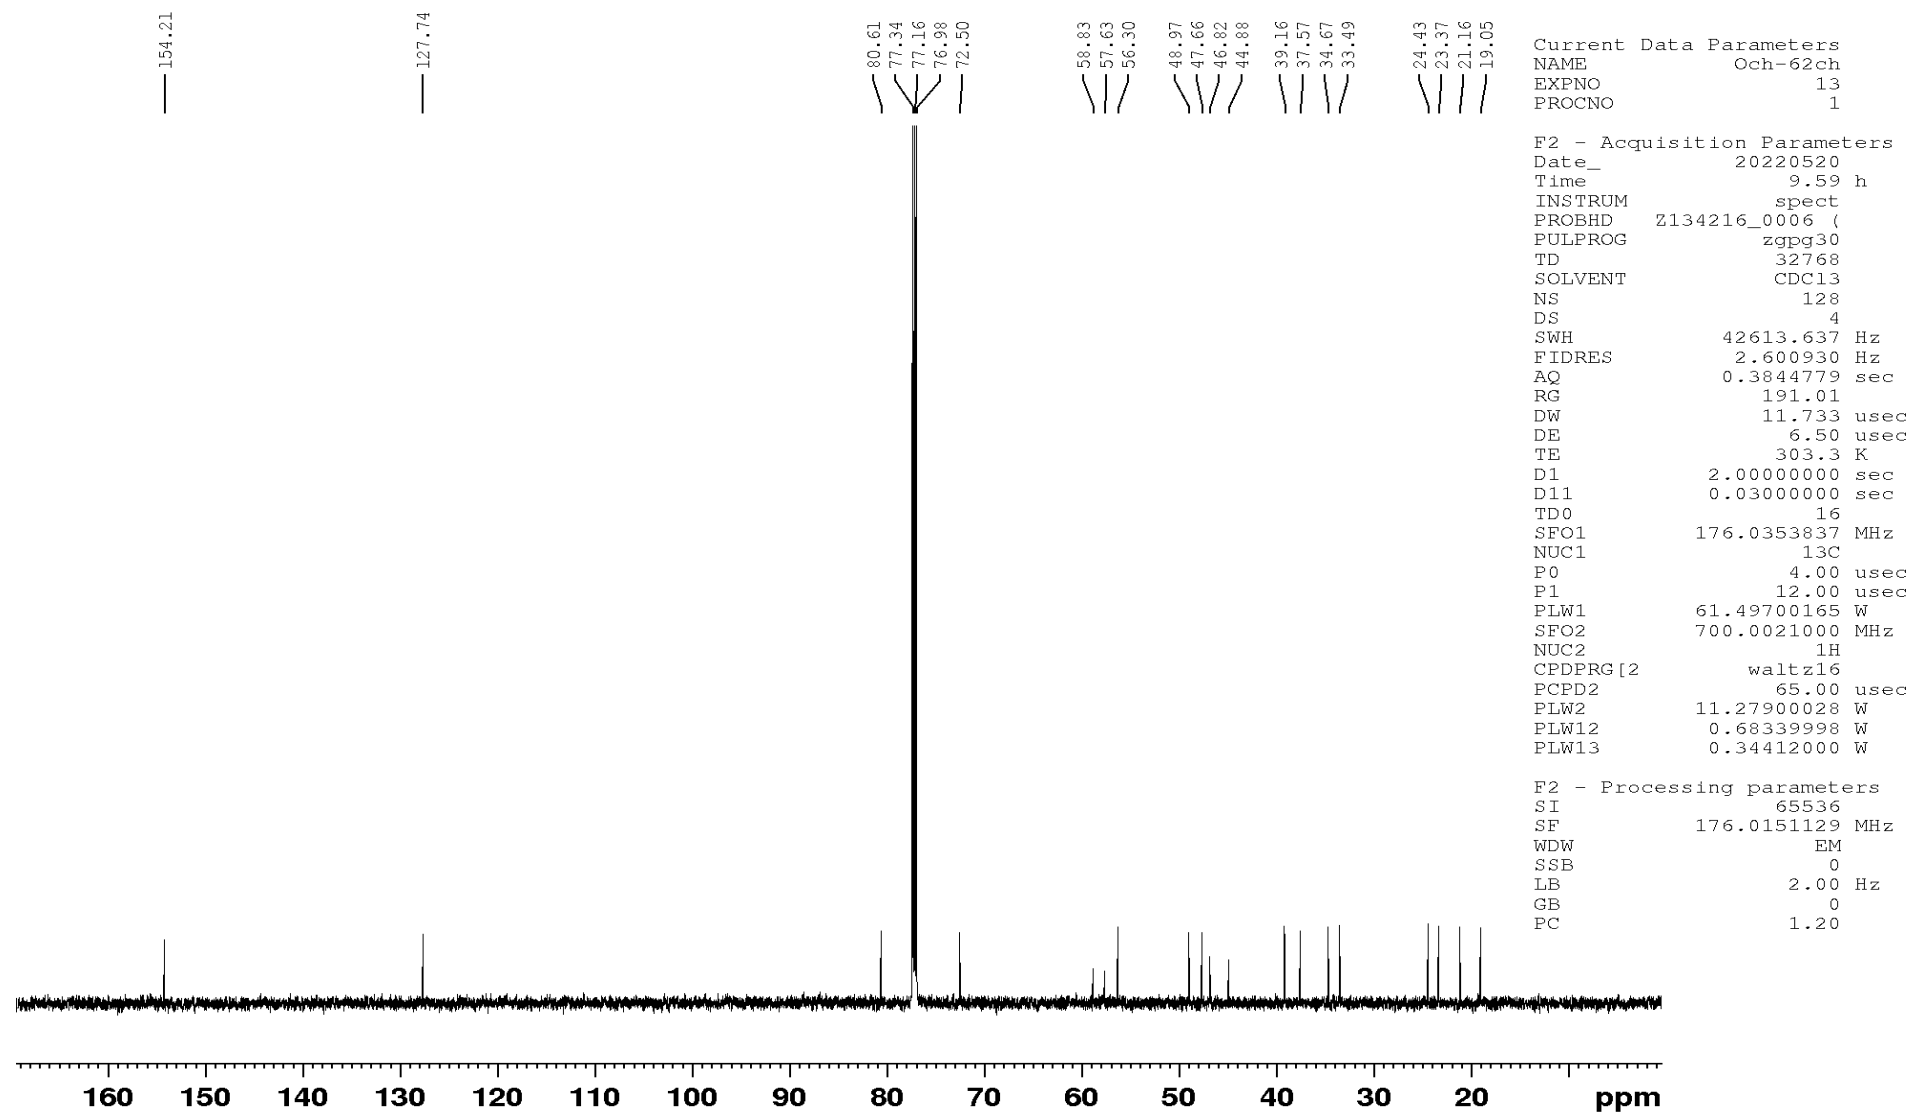

Figure S17. <sup>1</sup>H NMR spectrum (700 MHz, CDCl<sub>3</sub>) of 4

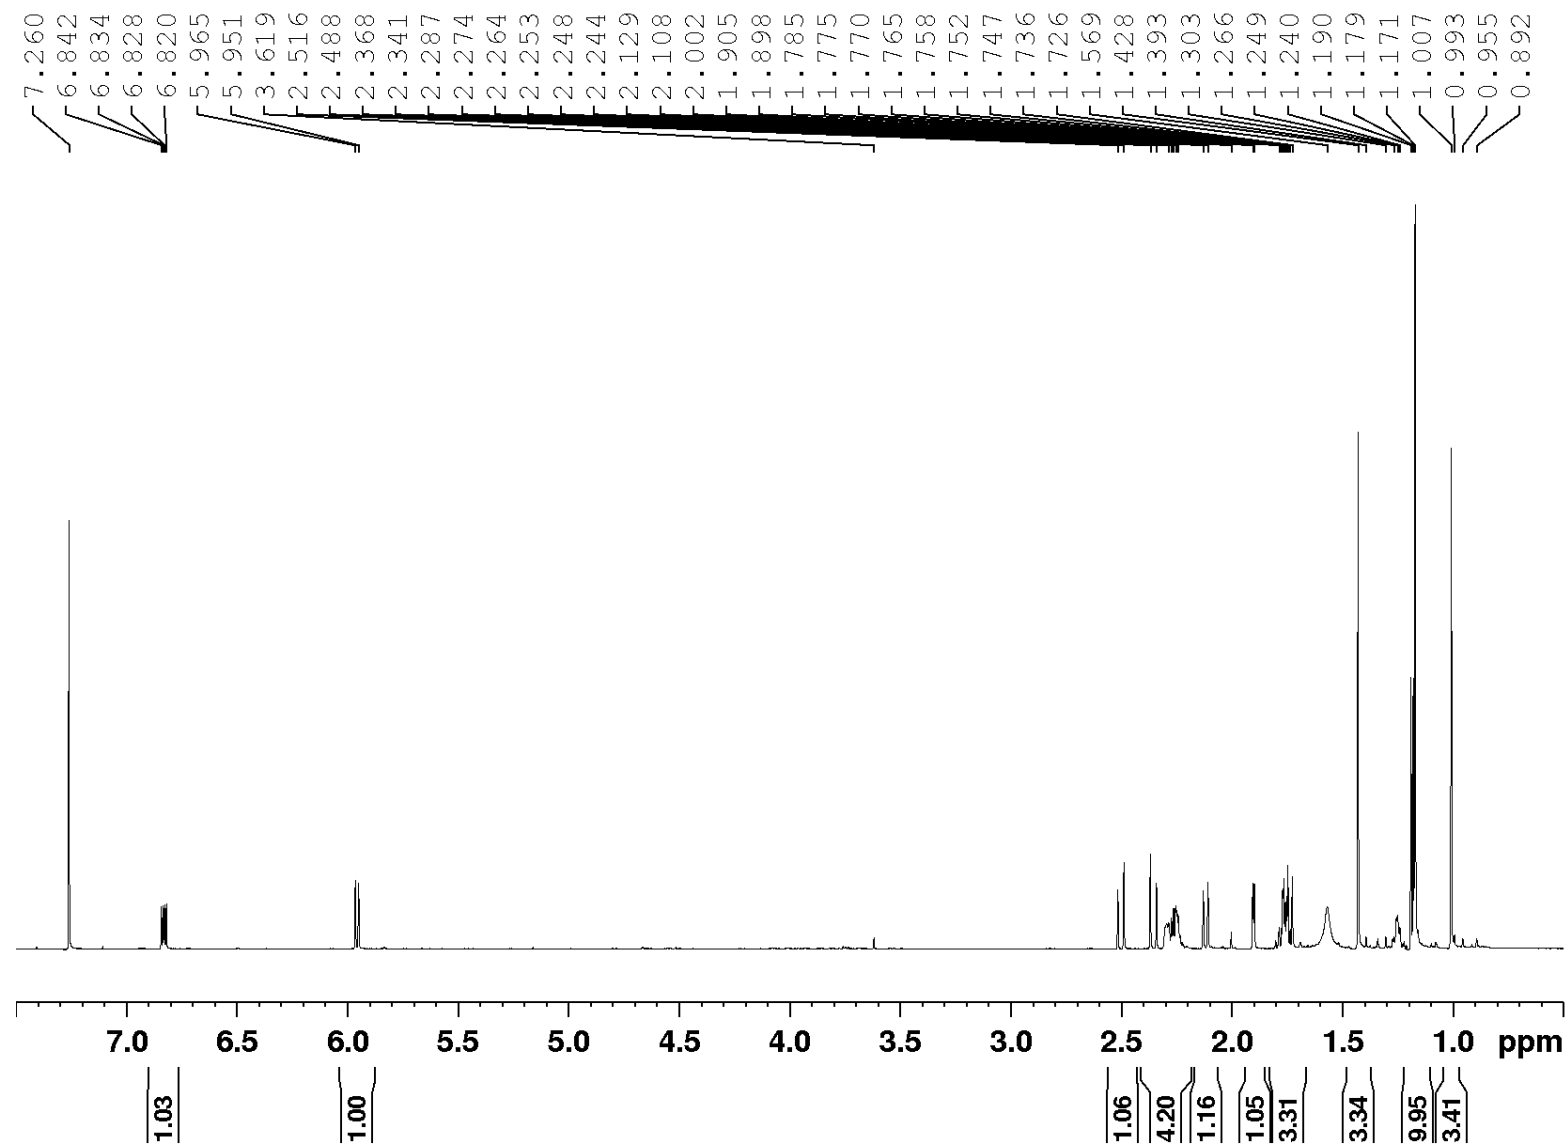

Current Data Parameters  
NAME Och-83ch  
EXPNO 1  
PROCNO 1

F2 - Acquisition Parameters  
Date\_ 20220520  
Time 9.01 h  
INSTRUM spect  
PROBHD Z134216\_0006 (   
PULPROG zg30  
TD 32768  
SOLVENT CDCl3  
NS 8  
DS 2  
SWH 10504.202 Hz  
FIDRES 0.641126 Hz  
AQ 1.5597568 sec  
RG 165.68  
DW 47.600 usec  
DE 6.50 usec  
TE 303.0 K  
D1 2.00000000 sec  
TD0 1  
SFO1 700.0051100 MHz  
NUC1 1H  
P0 5.33 usec  
P1 16.00 usec  
PLW1 11.27900028 W

F2 - Processing parameters  
SI 32768  
SF 700.0000162 MHz  
WDW EM  
SSB 0  
LB 0.10 Hz  
GB 0  
PC 4.00



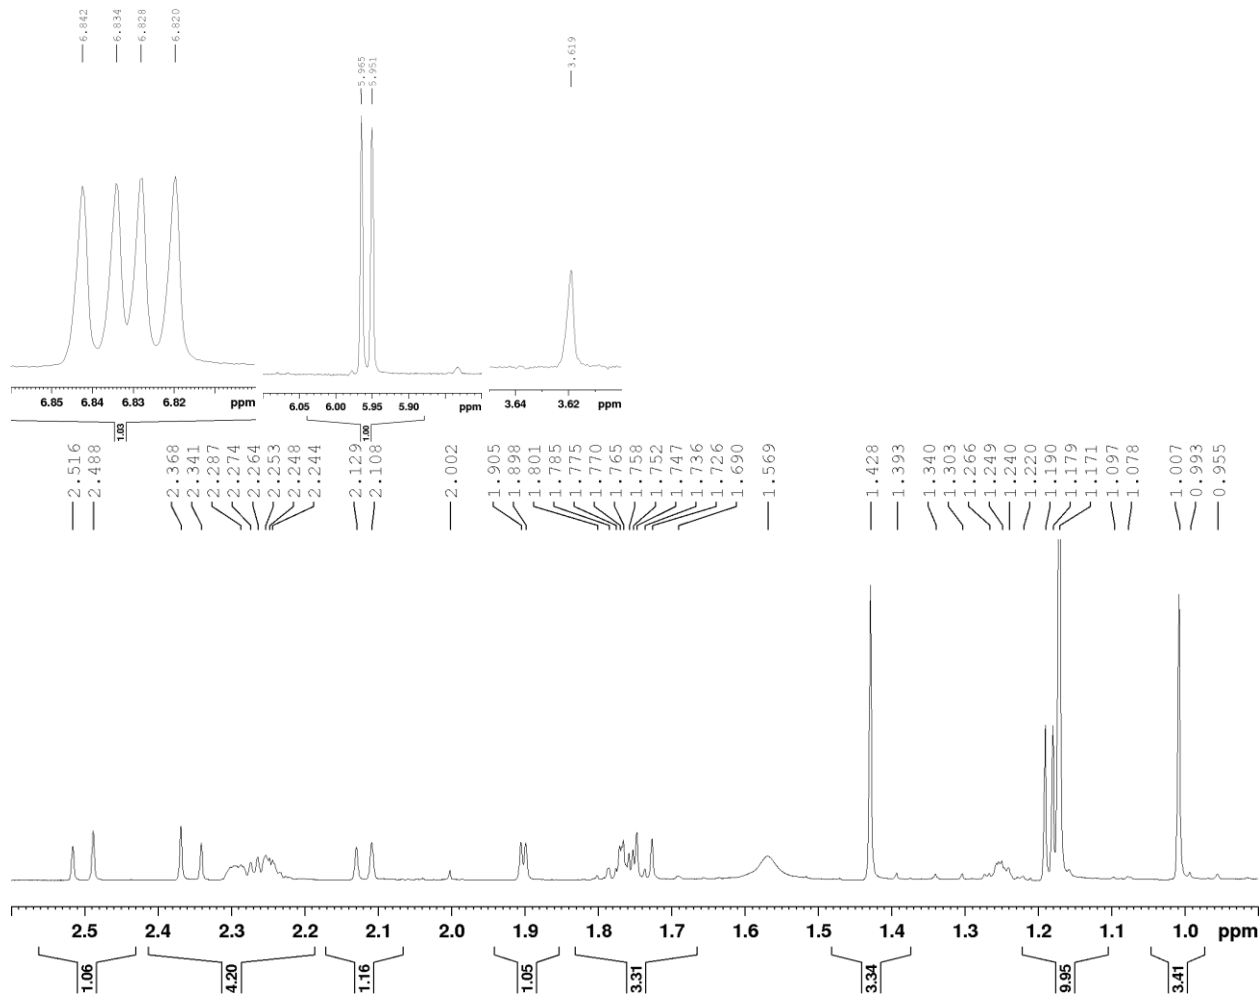

Figure S18.  $^{13}\text{C}$  NMR spectrum (700 MHz,  $\text{CDCl}_3$ ) of 4

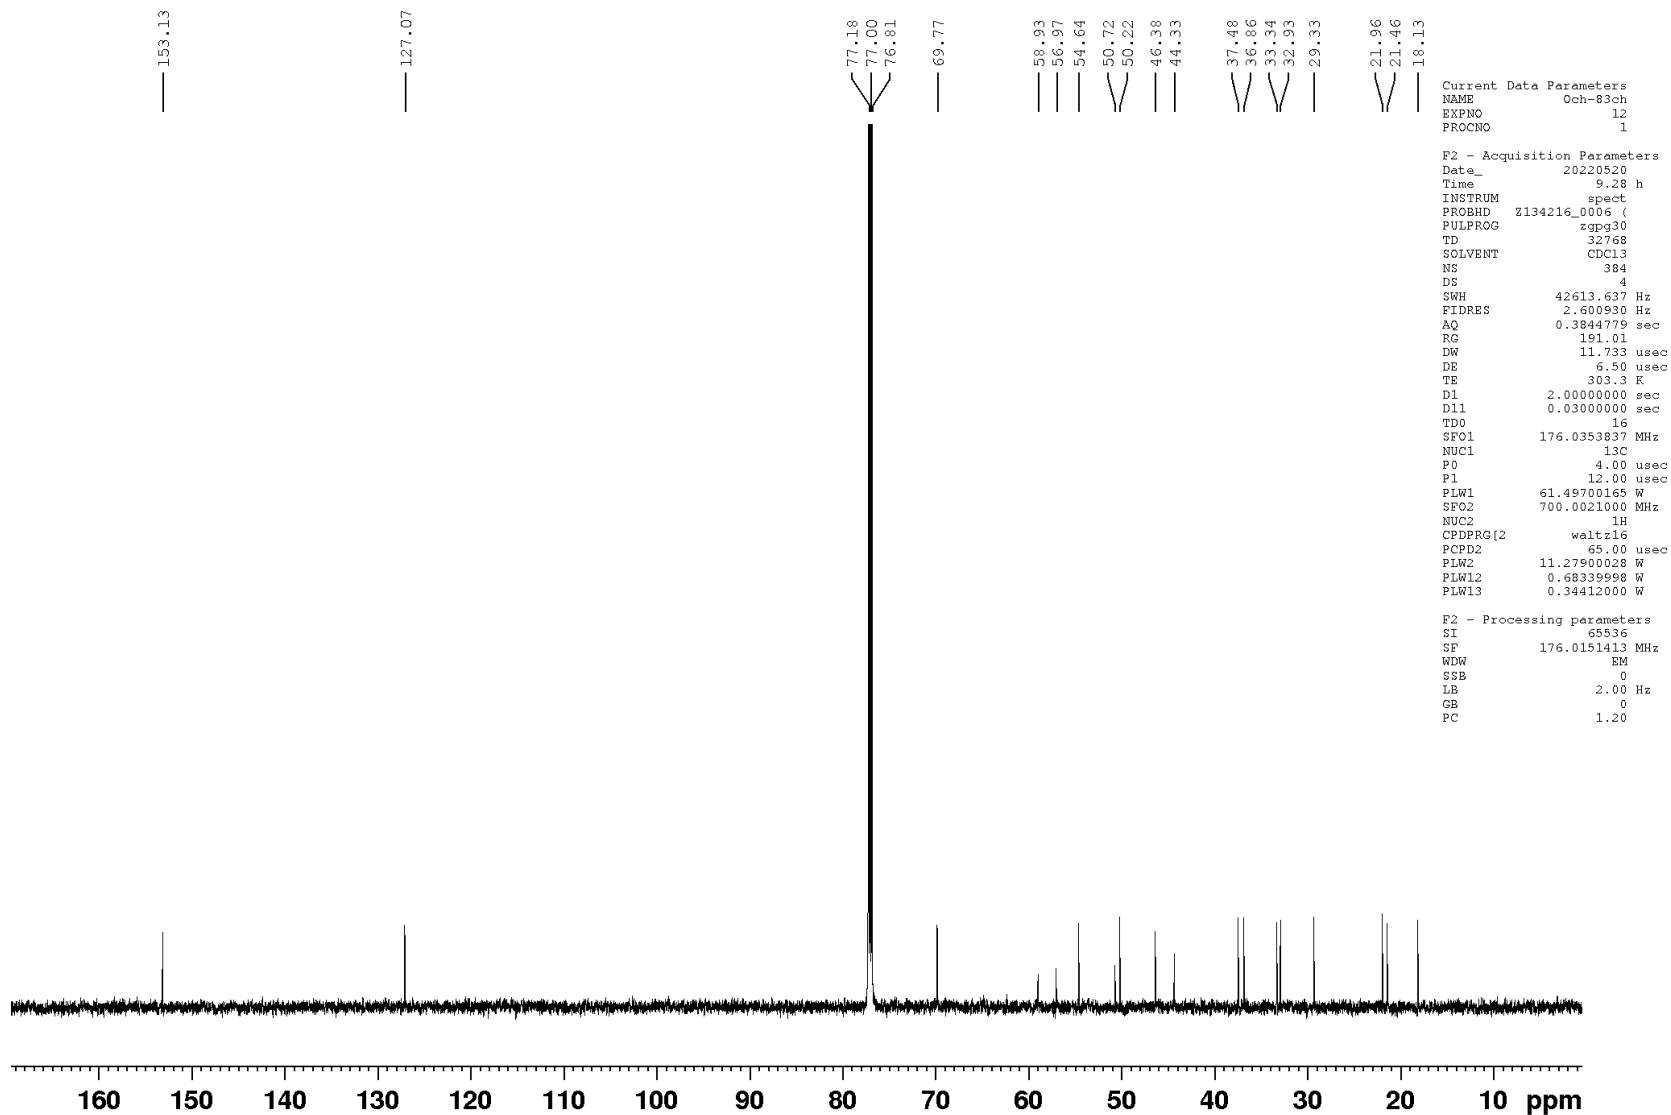

Figure S19.  $^1\text{H}$  NMR spectrum (500 MHz,  $\text{CDCl}_3$ ) of **5**

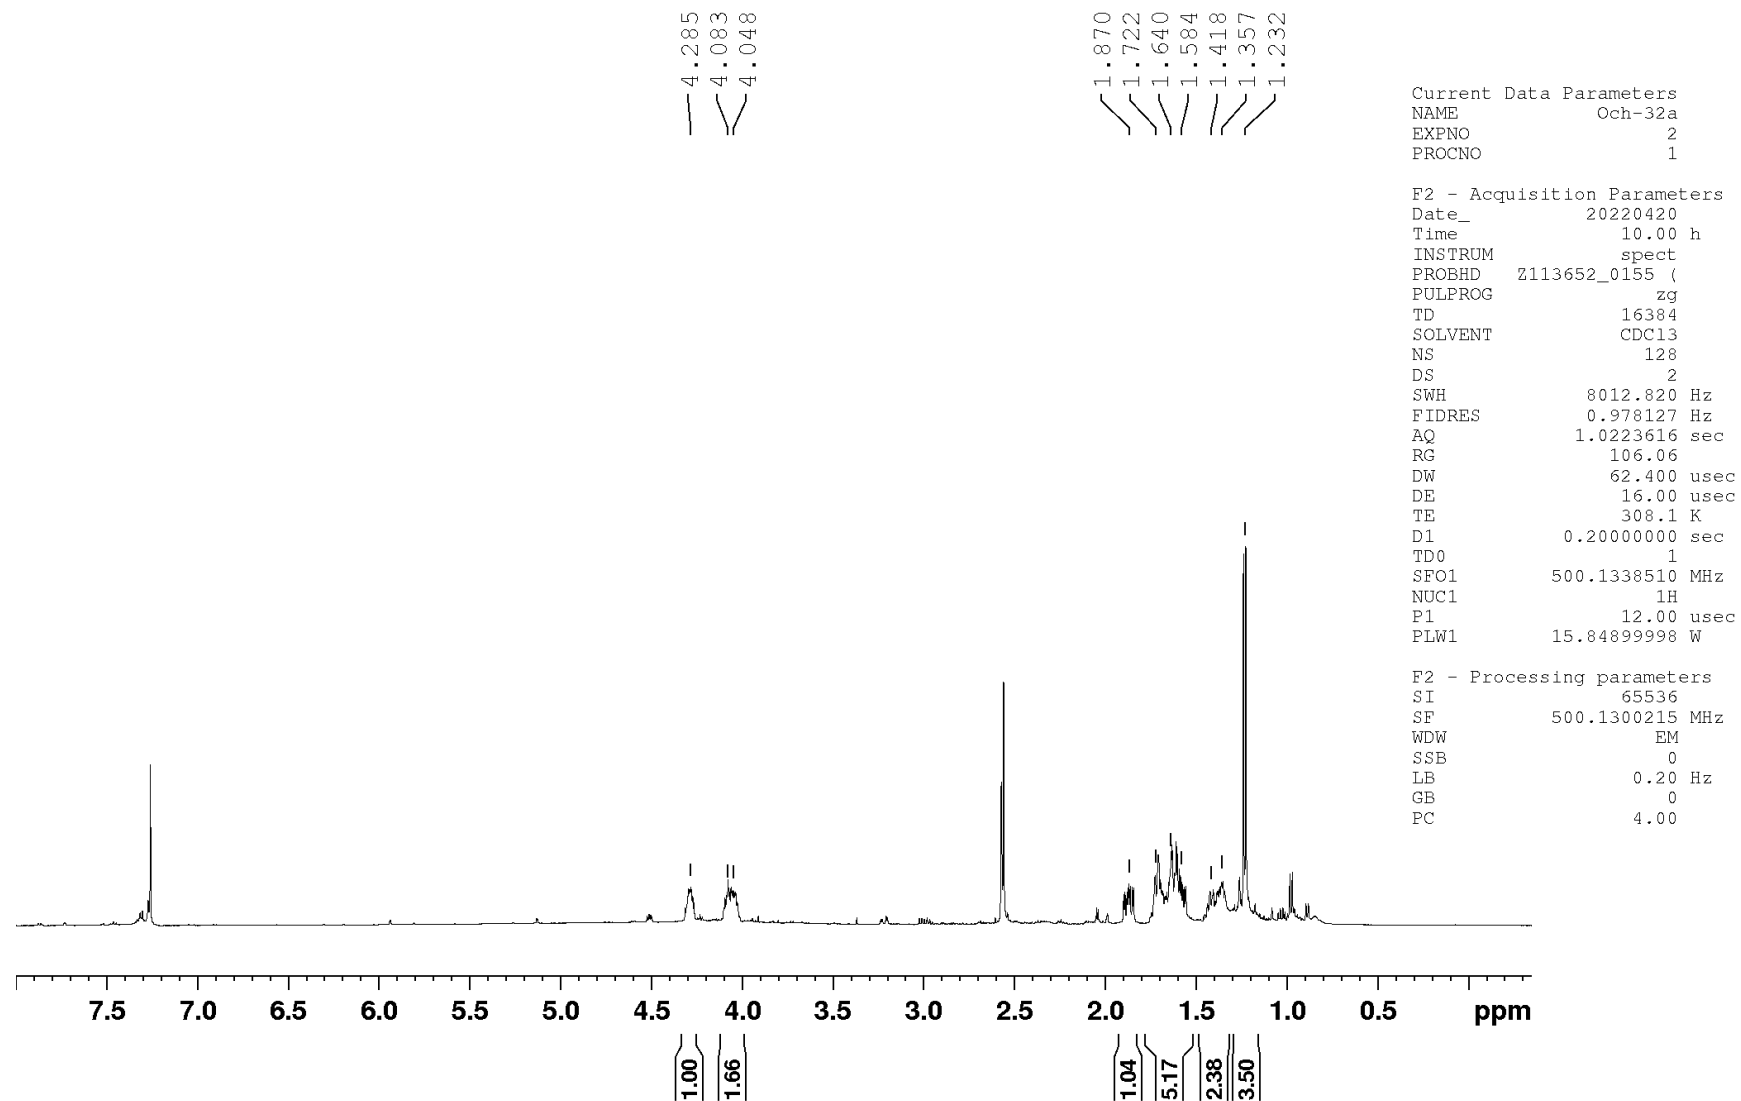

Figure S20.  $^{13}\text{C}$  NMR spectrum (500 MHz,  $\text{CDCl}_3$ ) of 5

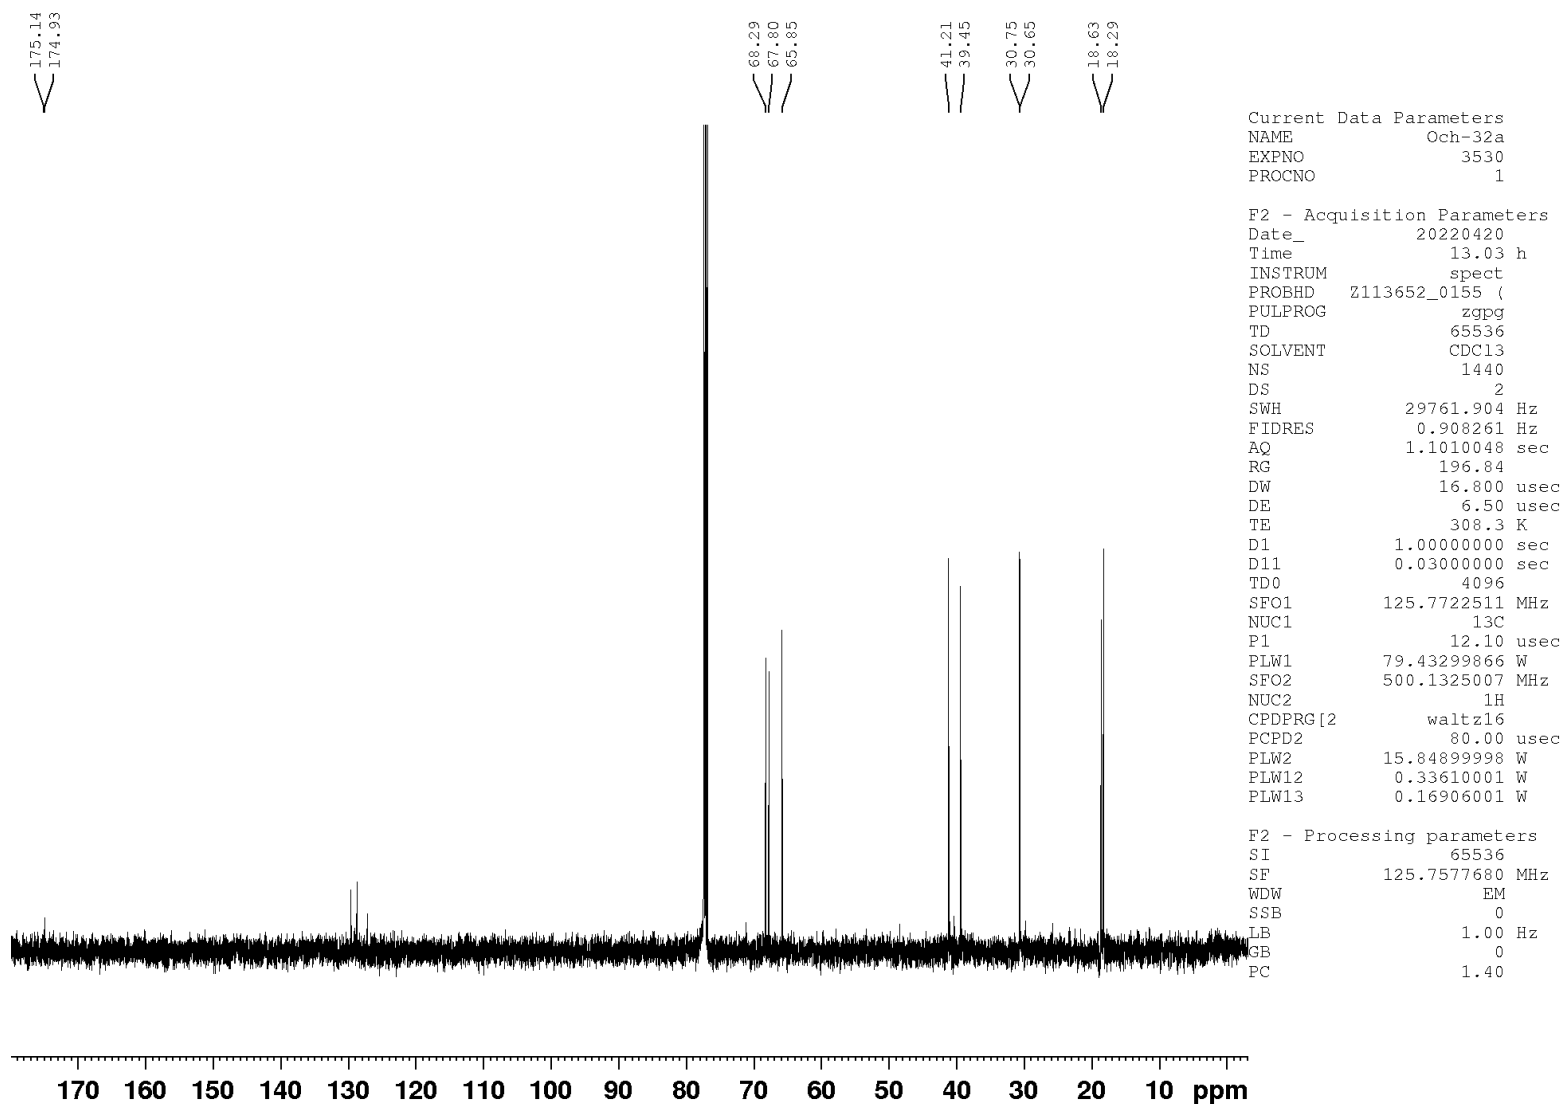

Figure S21. DEPT NMR spectrum (500 MHz, CDCl<sub>3</sub>) of 5

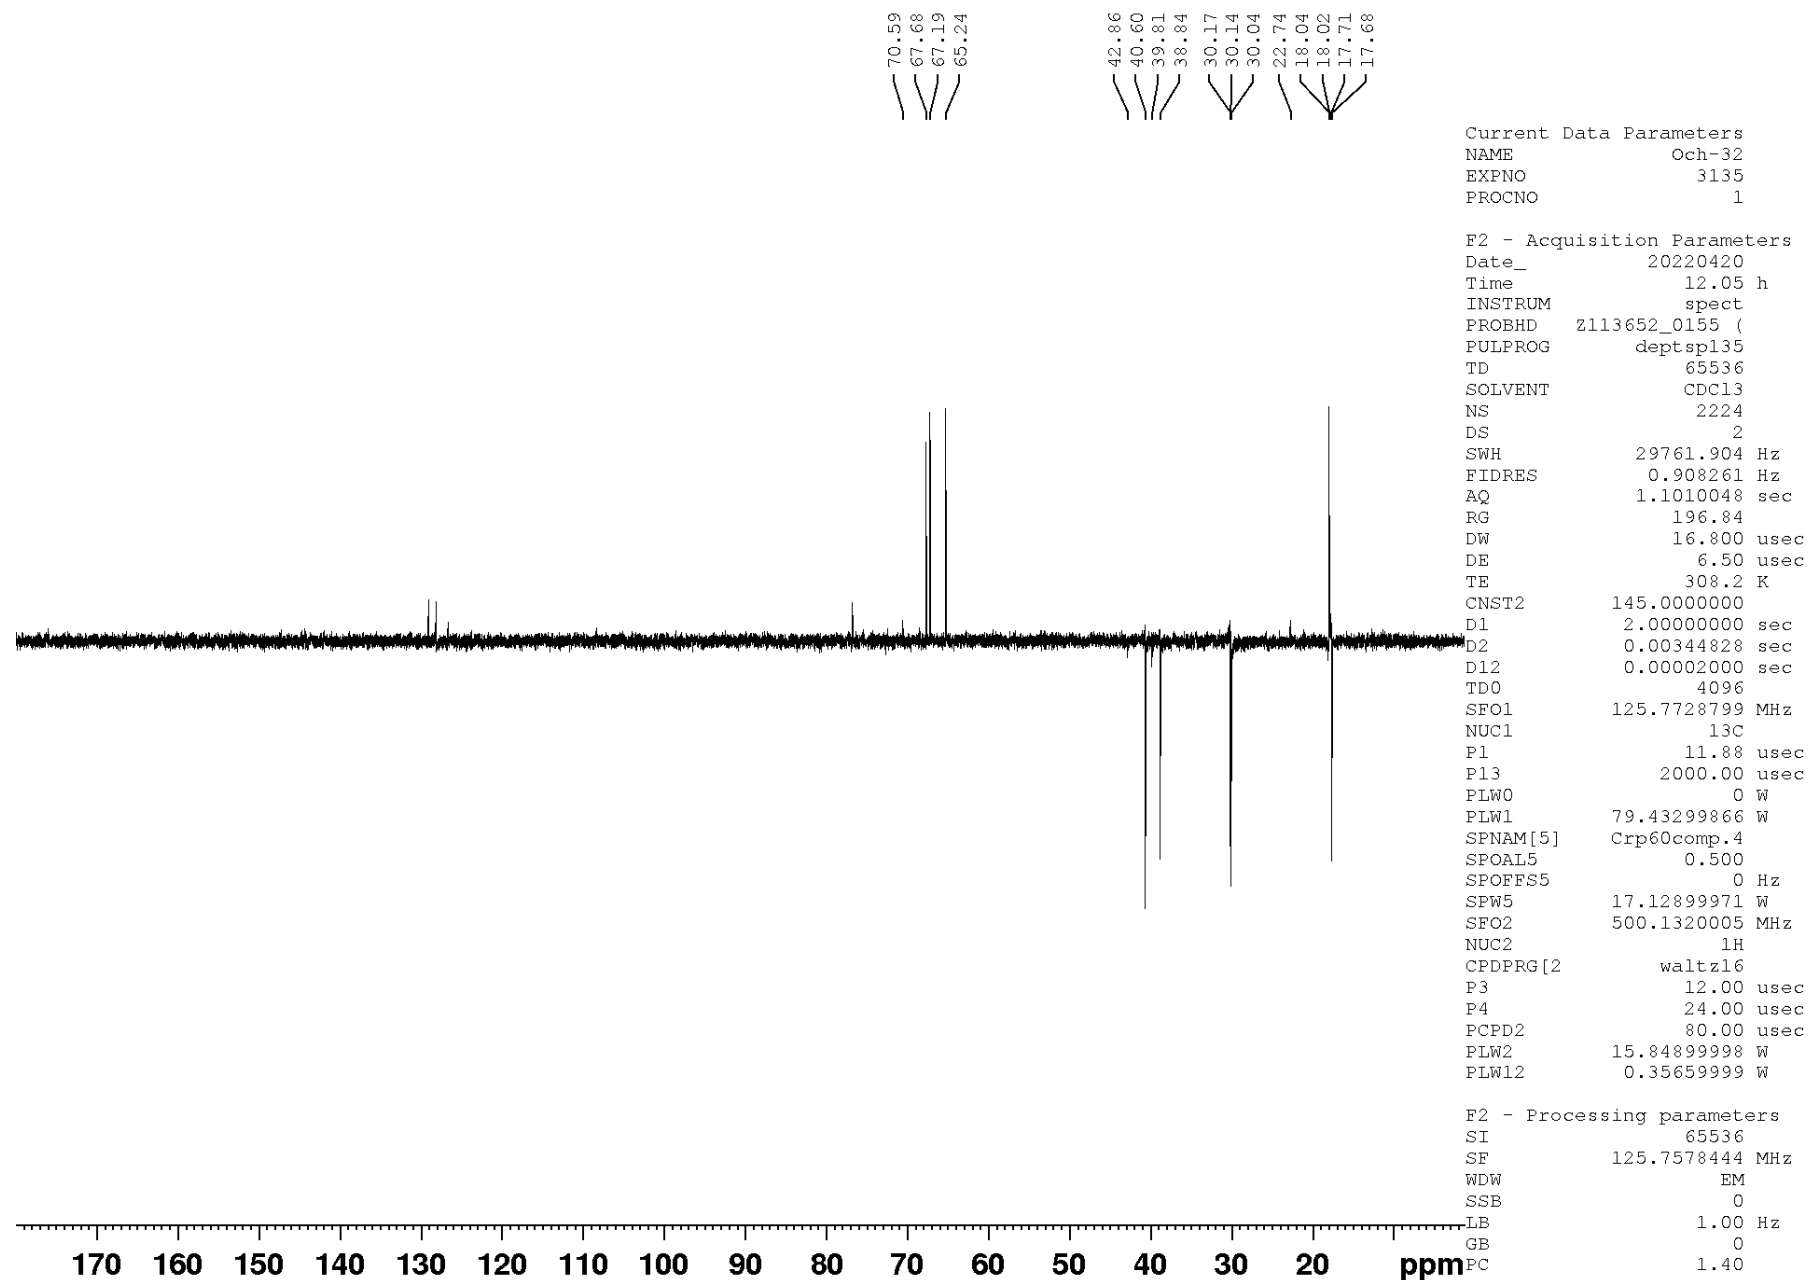

Figure S22. HSQC NMR spectrum (500 MHz, CDCl<sub>3</sub>) of 5

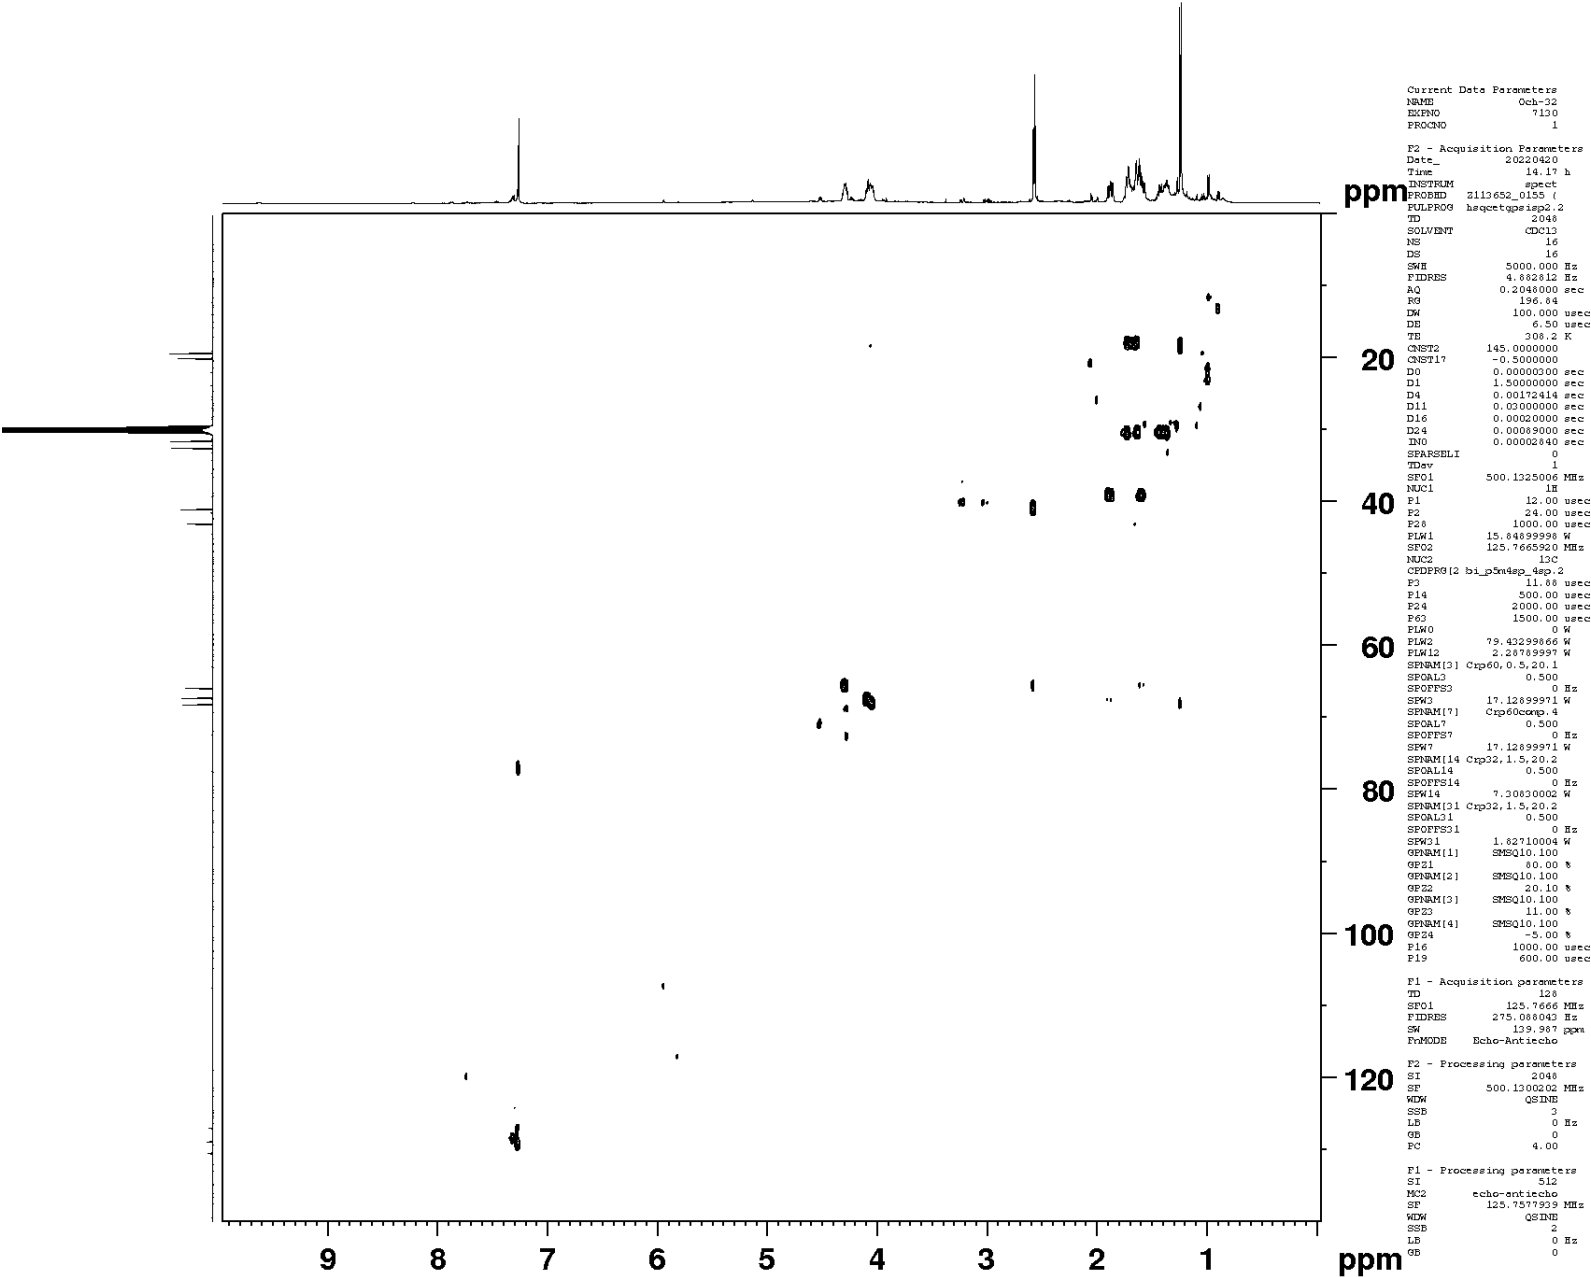

Figure S23. HMBC NMR spectrum (500 MHz, CDCl<sub>3</sub>) of 5

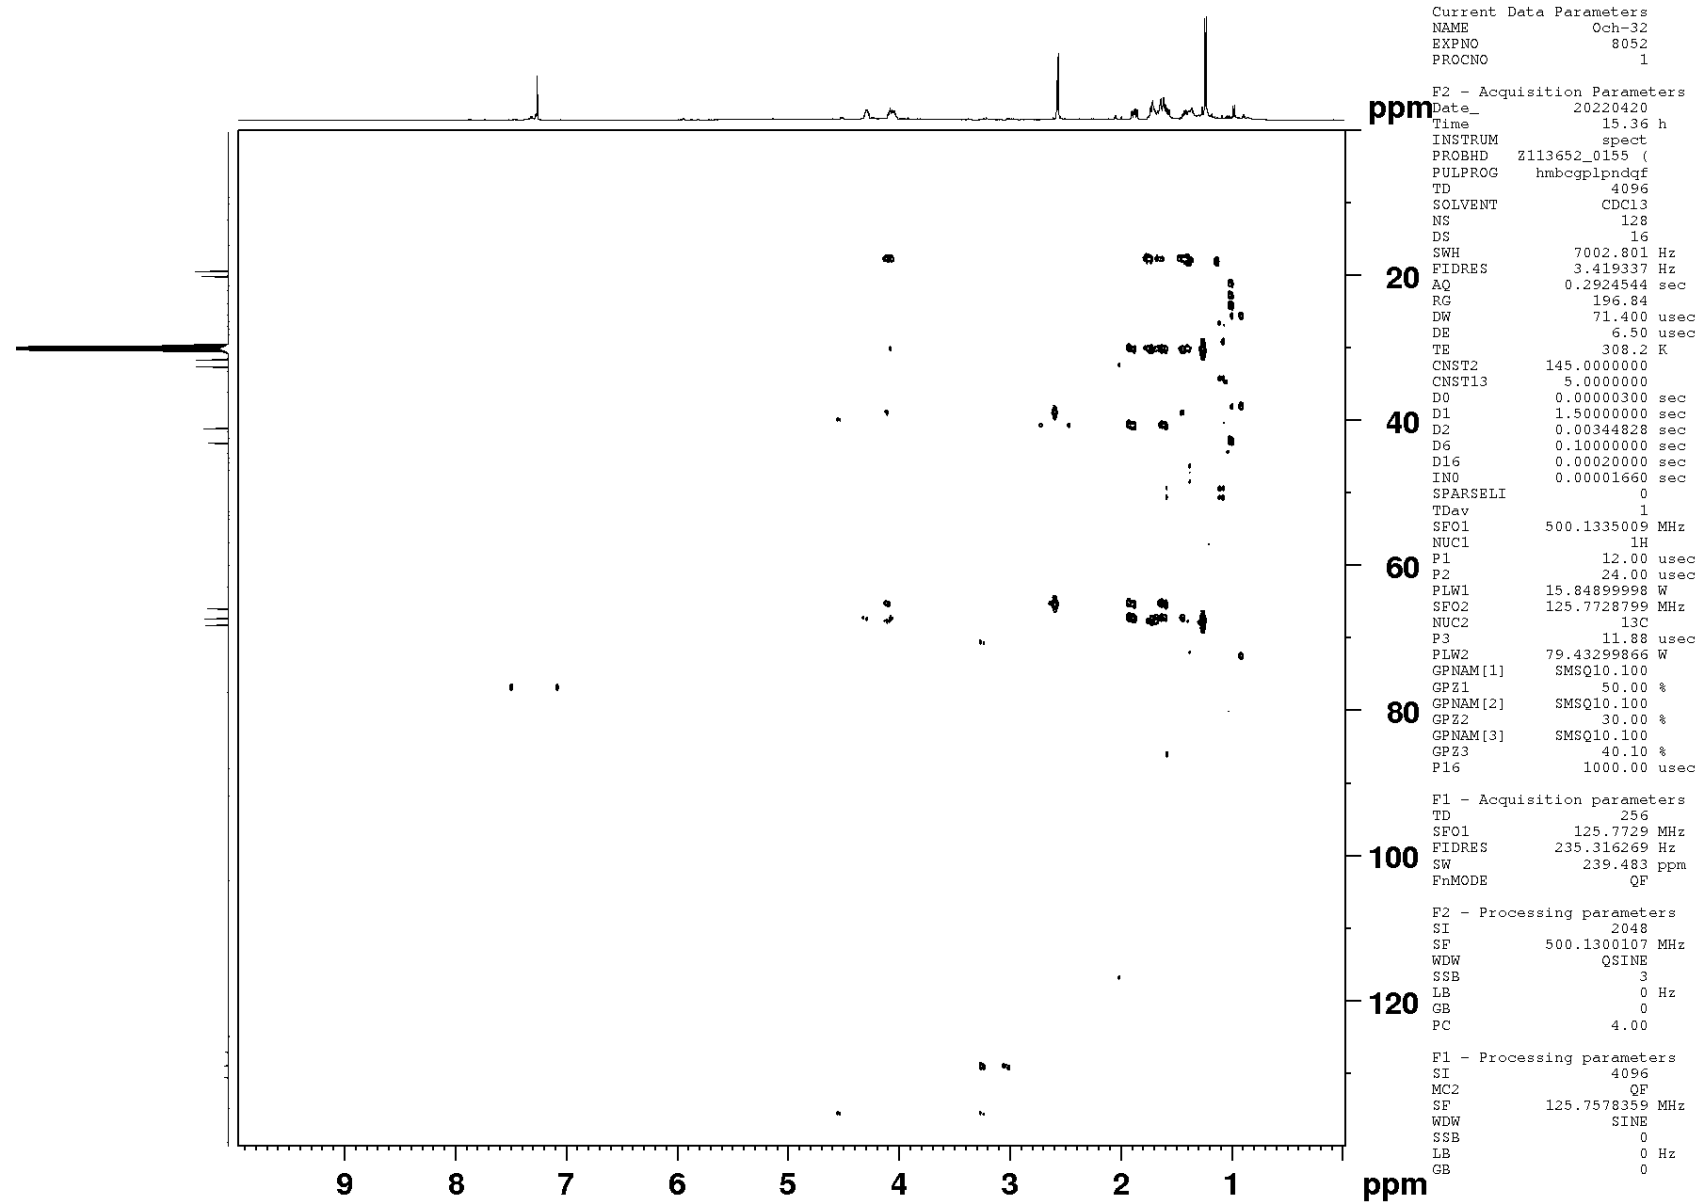

Figure S24.  $^1\text{H}$ - $^1\text{H}$  COSY NMR spectrum (500 MHz,  $\text{CDCl}_3$ ) of **5**

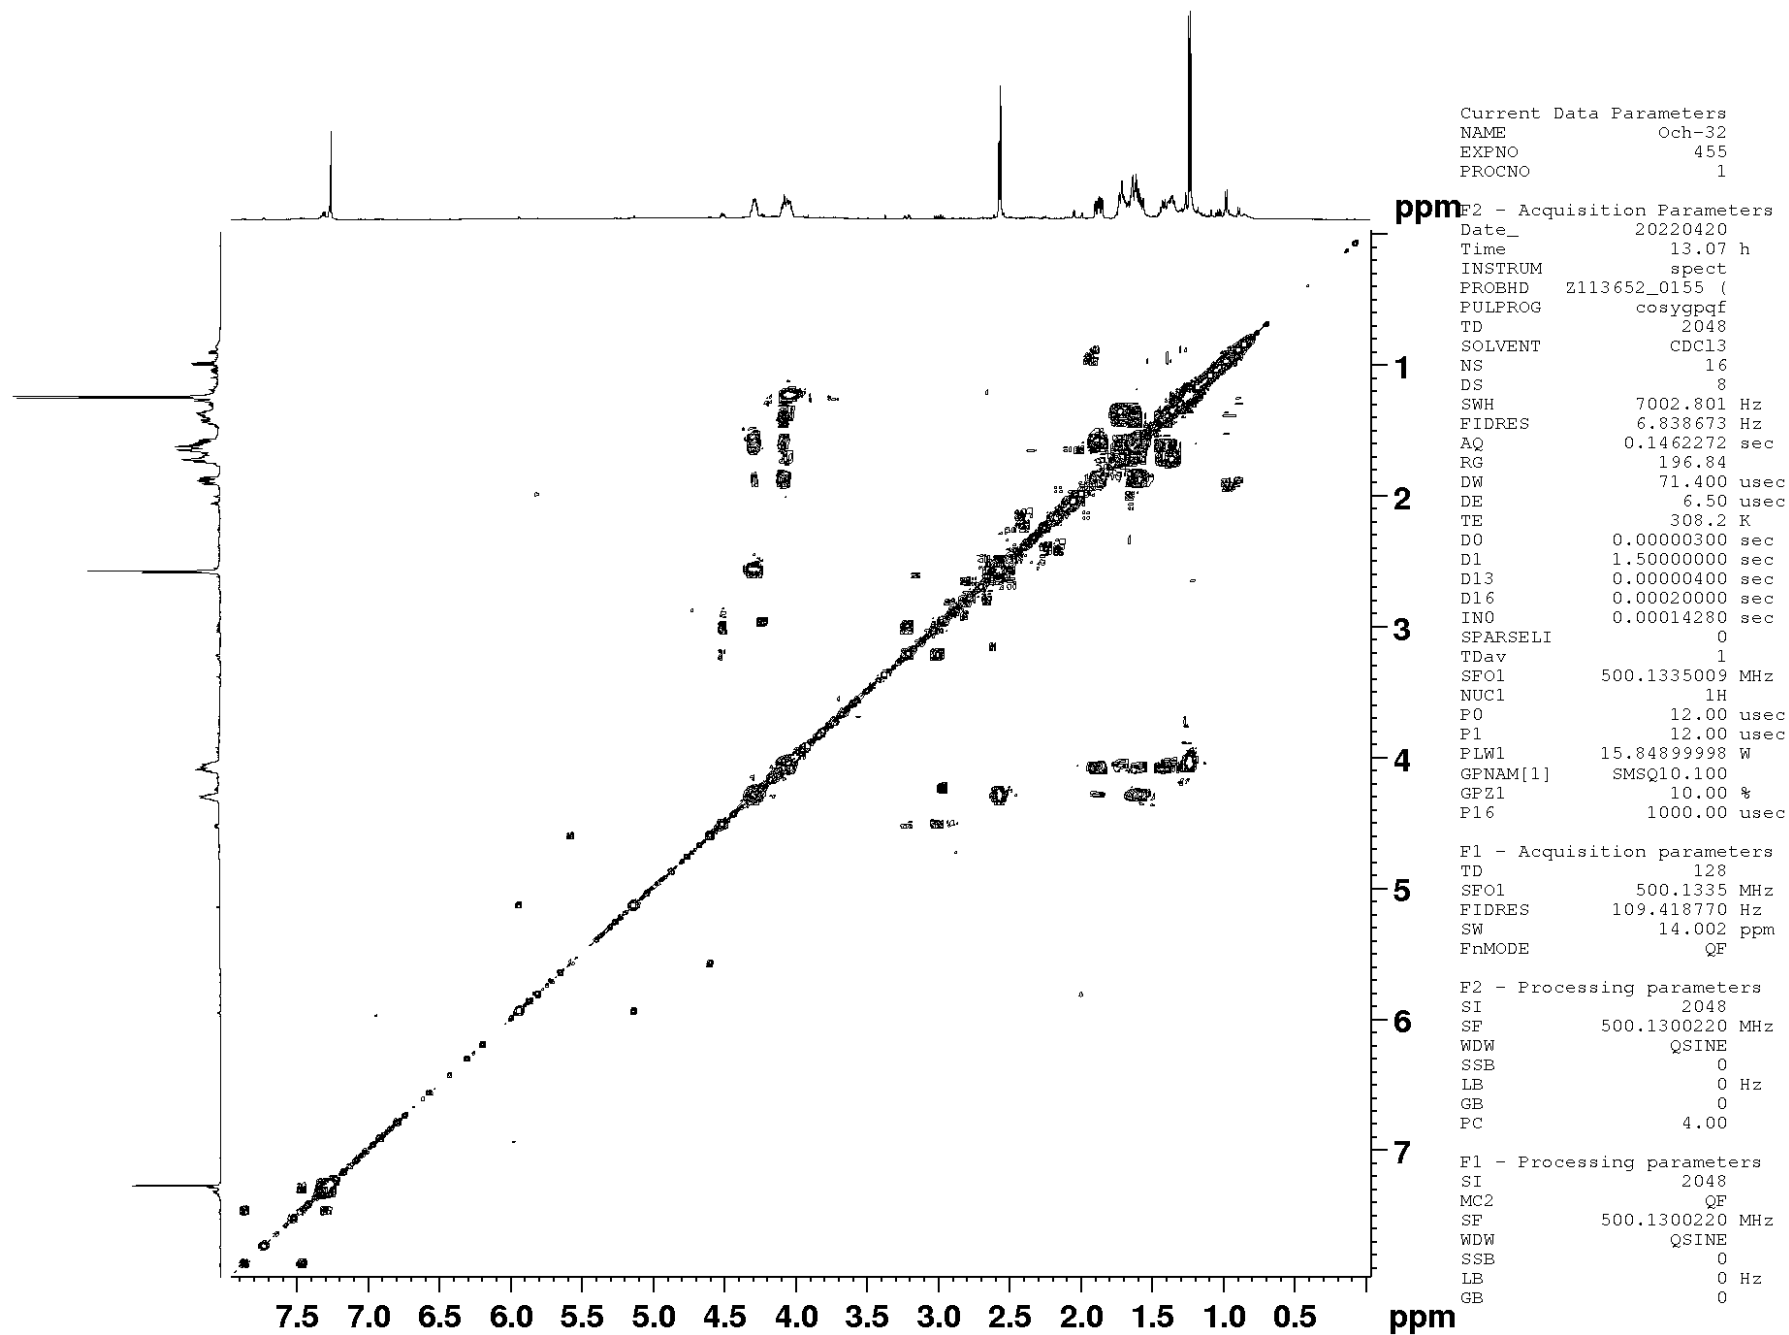



Figure S25. NOESY NMR spectrum (500 MHz, CDCl<sub>3</sub>) of 5

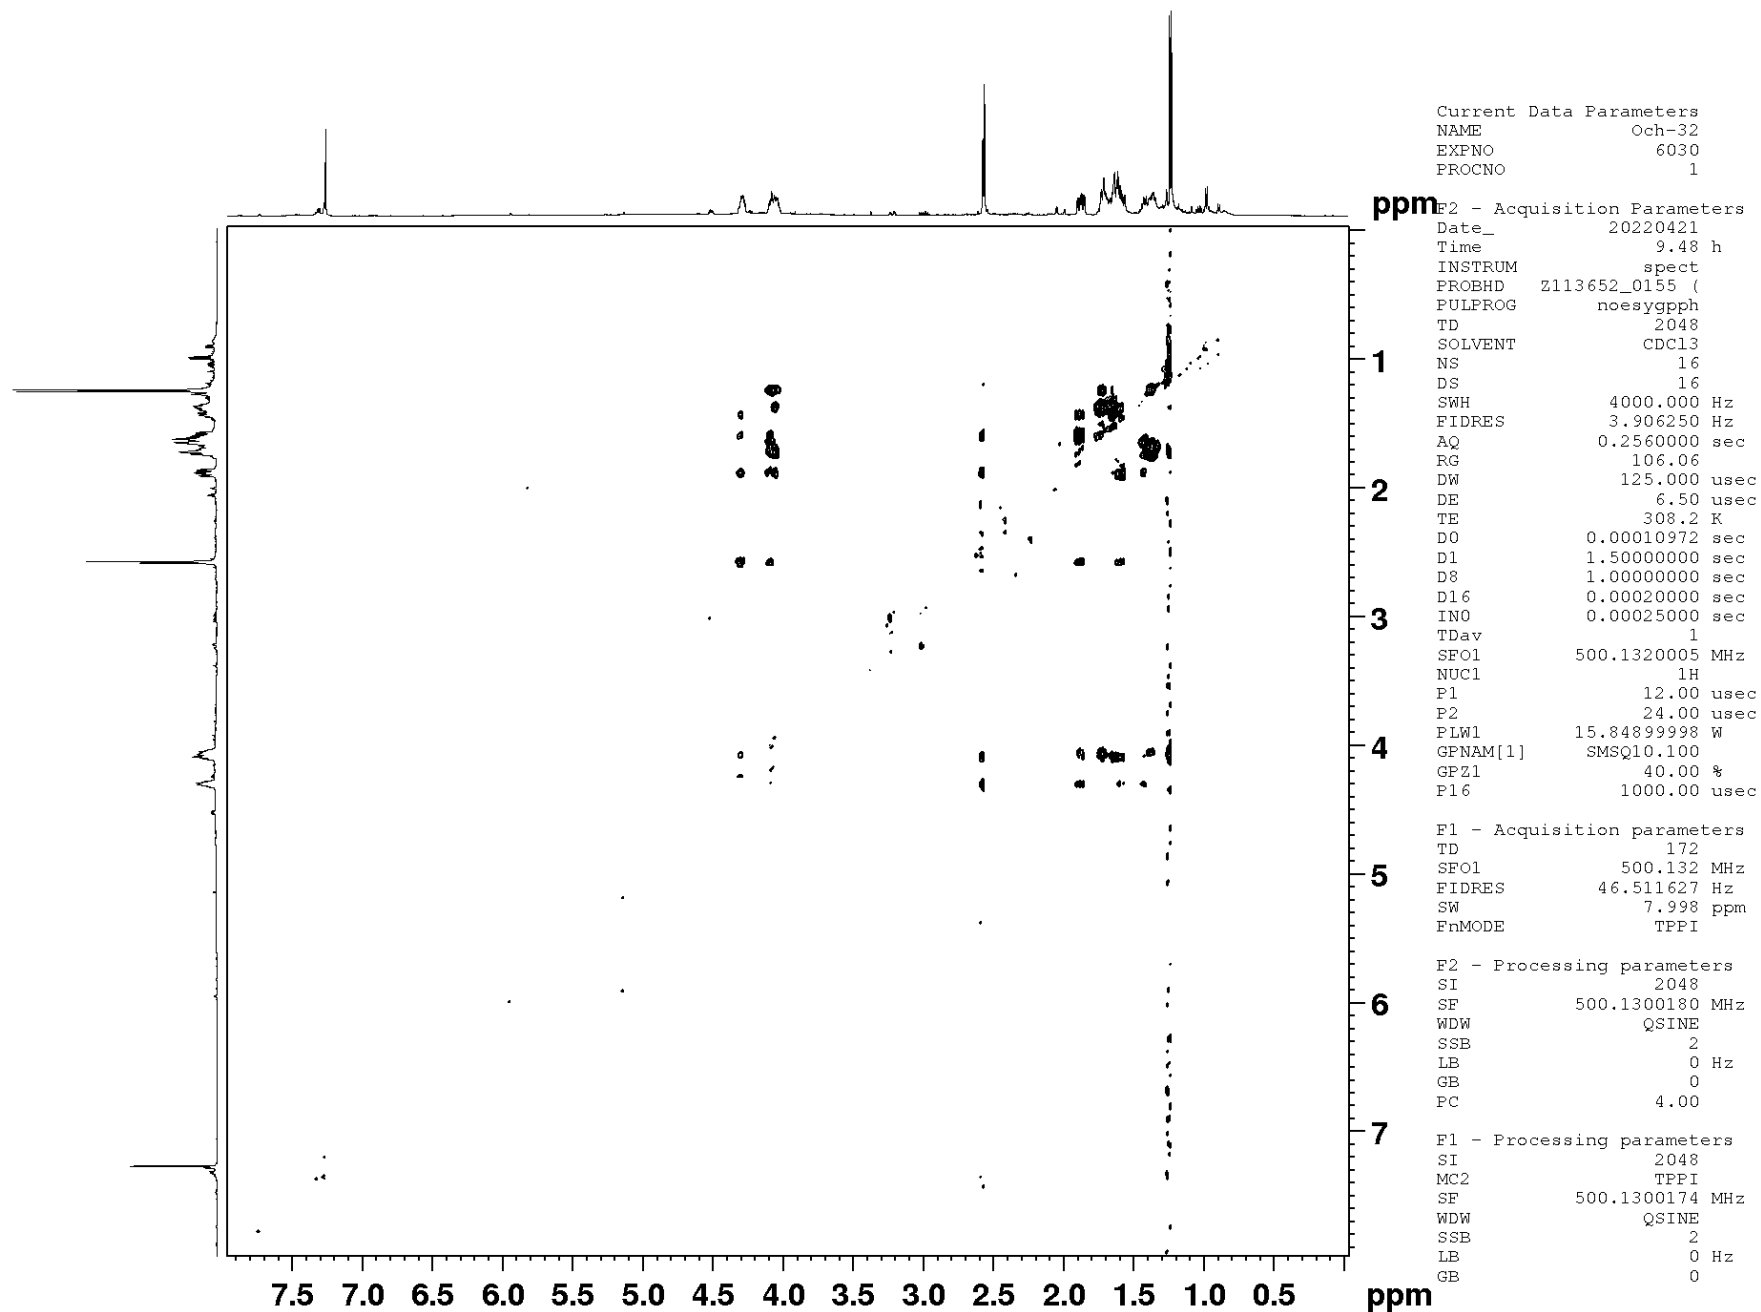

Figure S26. <sup>1</sup>H NMR spectrum (500 MHz, acetone-d<sub>6</sub>) of 6

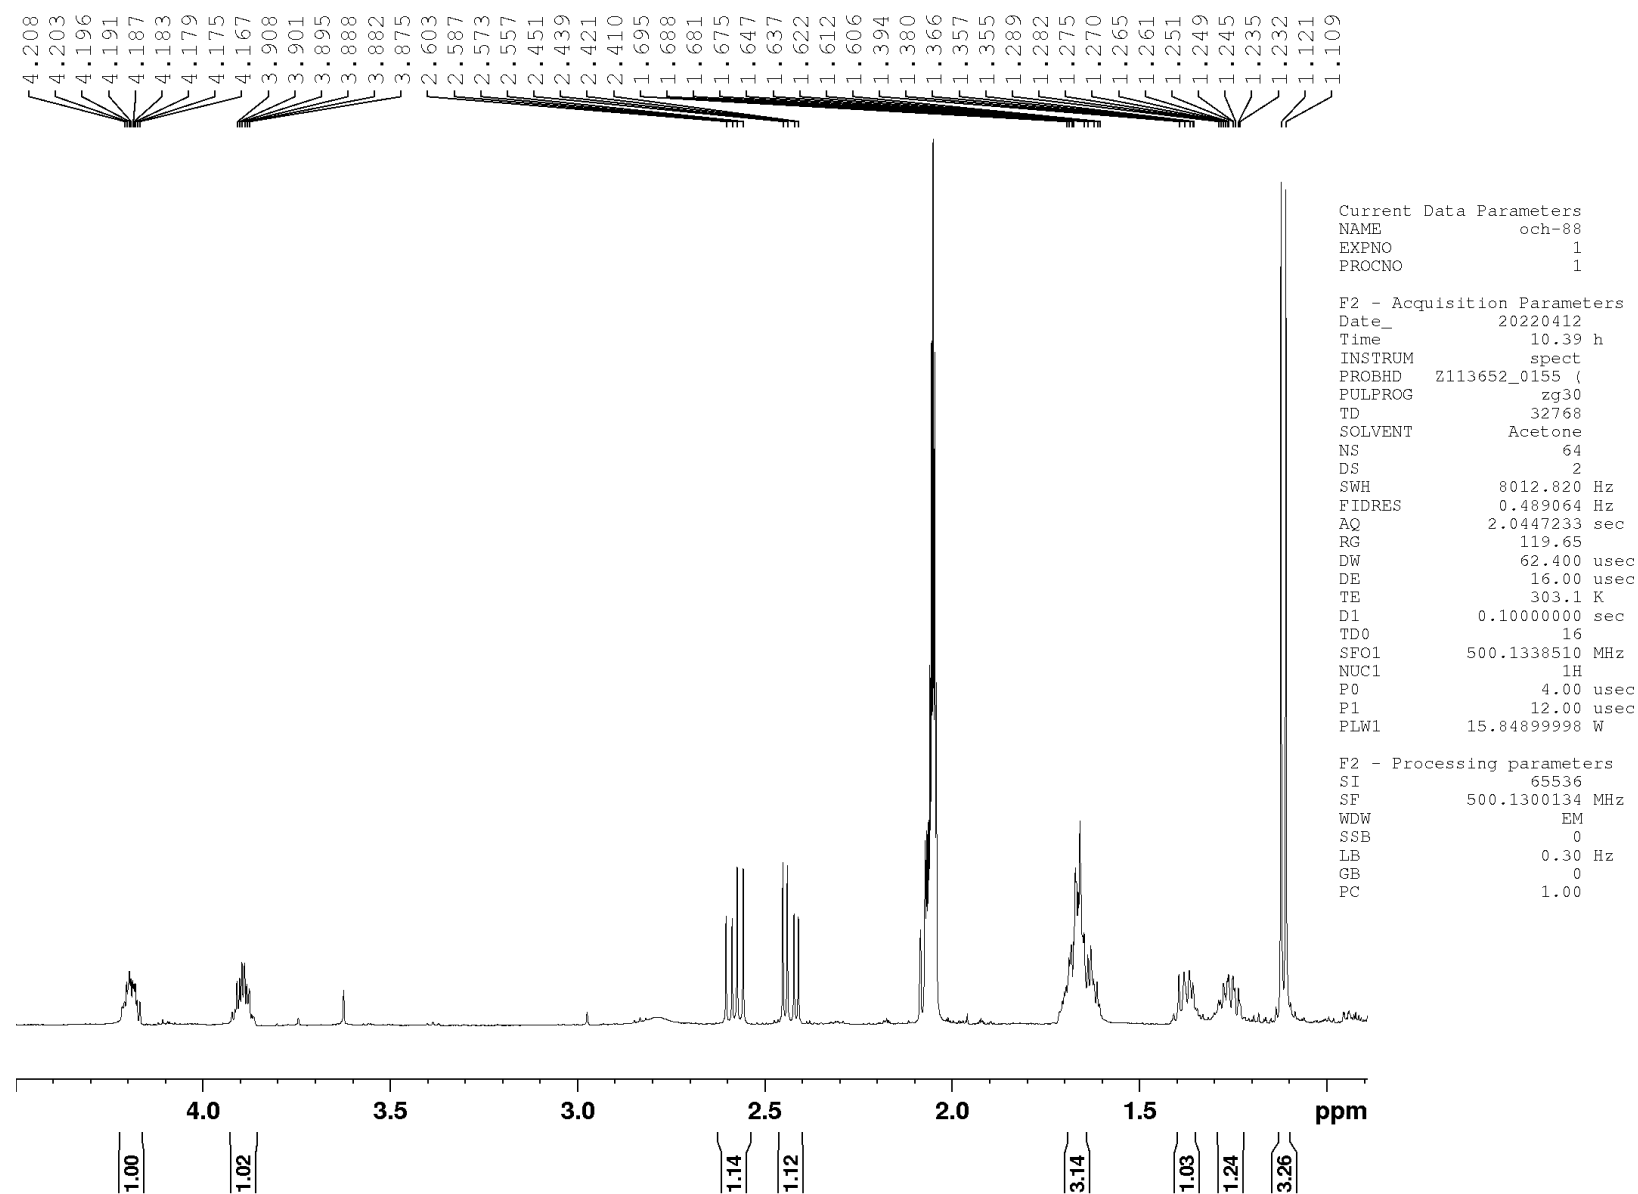

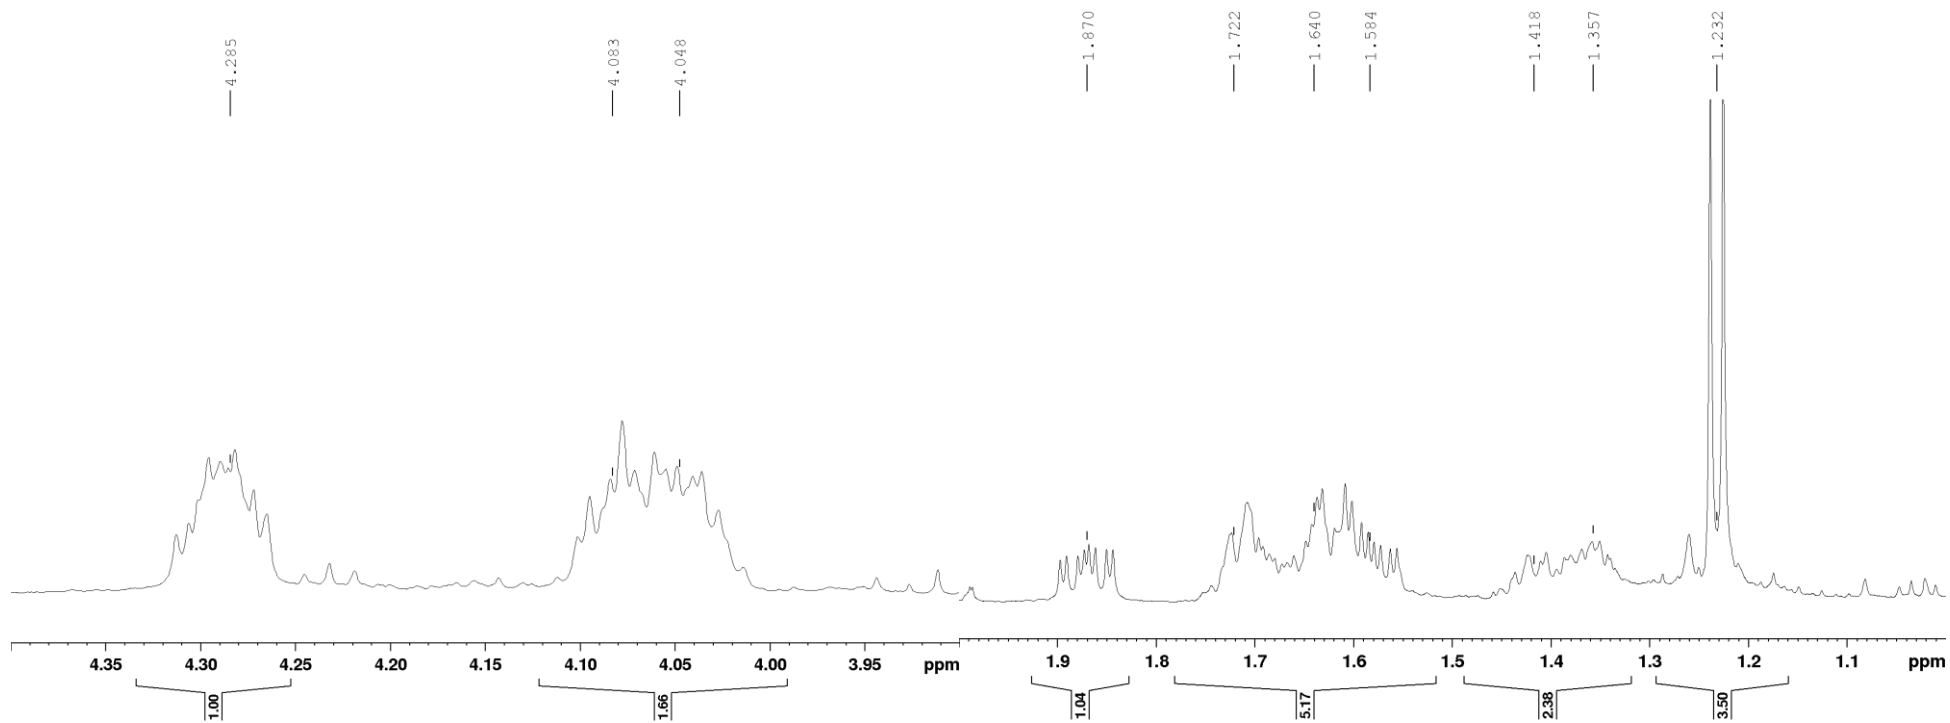

Figure S27.  $^{13}\text{C}$  NMR spectrum (500 MHz, acetone- $d_6$ ) of 6

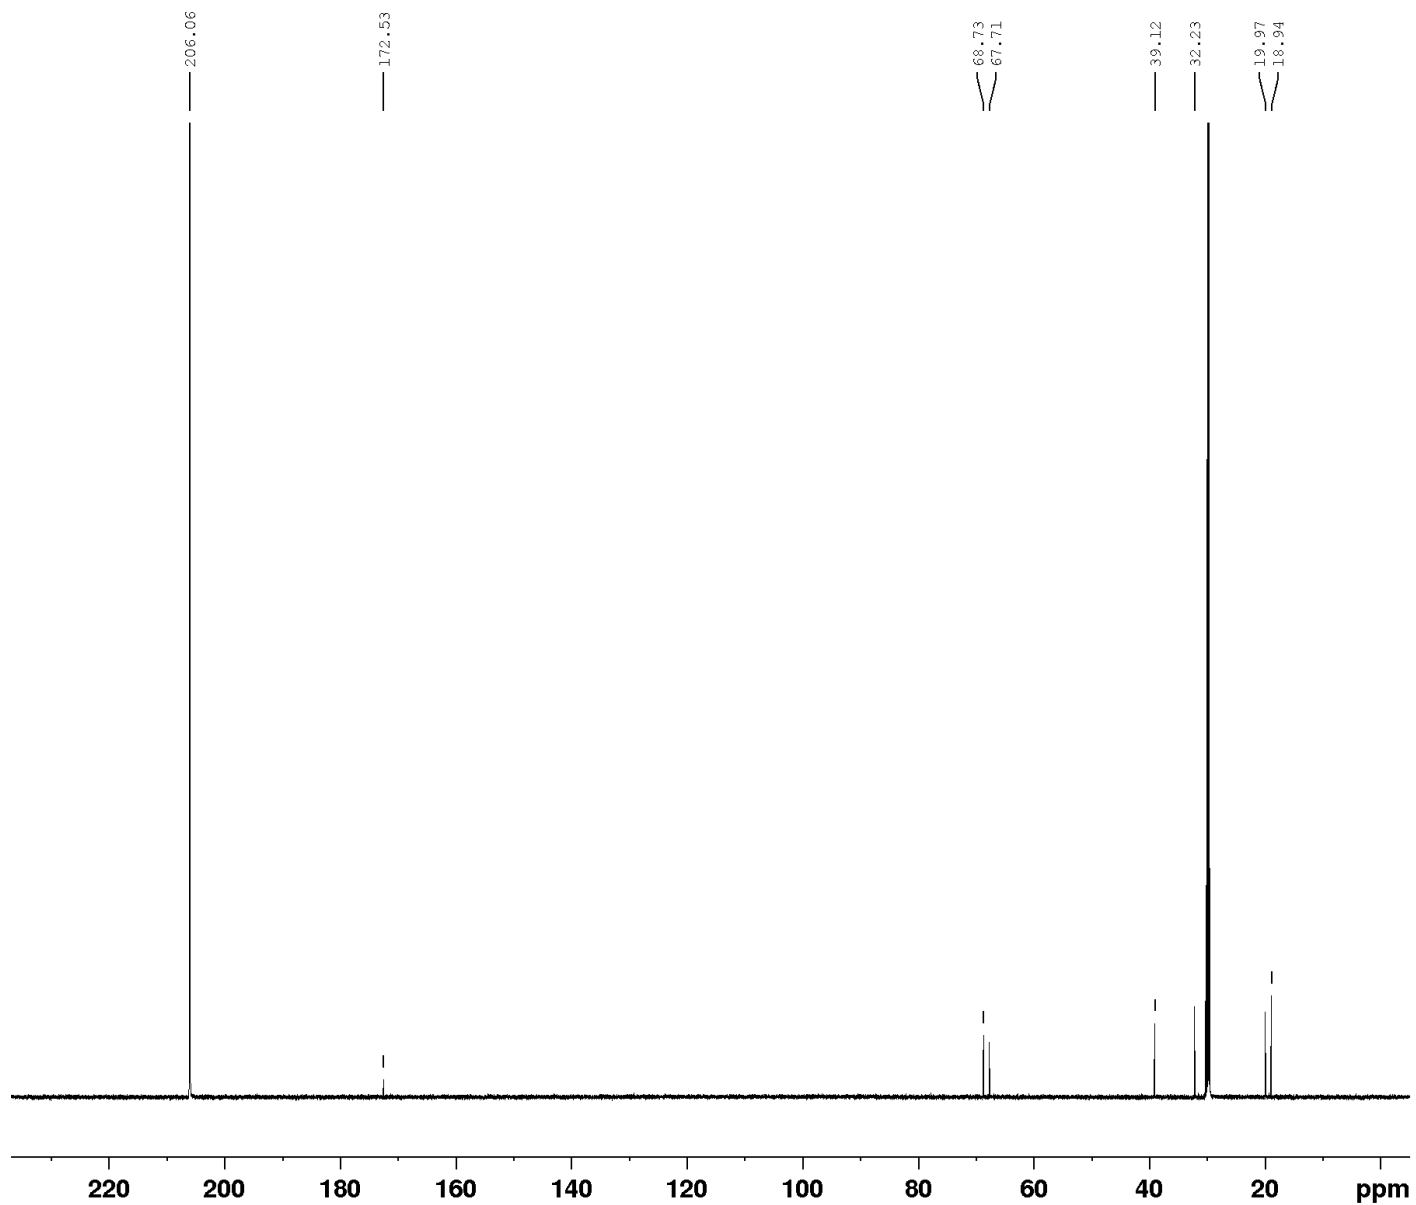

Current Data Parameters  
NAME och-88  
EXPNO 3730  
PROCNO 1

F2 - Acquisition Parameters  
Date\_ 20220410  
Time 14.06 h  
INSTRUM spect  
PROBHD Z134216\_0006 (   
PULPROG zgpgg  
TD 65536  
SOLVENT Acetone  
NS 400  
DS 2  
SWH 42613.637 Hz  
FIDRES 1.300465 Hz  
AQ 0.7689557 sec  
RG 191.01  
DW 11.733 usec  
DE 6.50 usec  
TE 308.3 K  
D1 4.00000000 sec  
D11 0.03000000 sec  
TD0 4096  
SFO1 176.0353807 MHz  
NUC1 13C  
P1 12.00 usec  
PLW1 61.49700165 W  
SFO2 700.0035000 MHz  
NUC2 1H  
CPDPRG[2 waltz16  
PCPD2 65.00 usec  
PLW2 11.27900028 W  
PLW12 0.68339998 W  
PLW13 0.34412000 W

F2 - Processing parameters  
SI 65536  
SF 176.0149724 MHz  
WDW EM  
SSB 0  
LB 1.00 Hz  
GB 0  
PC 1.40

Figure S28. UV spectrum of 1

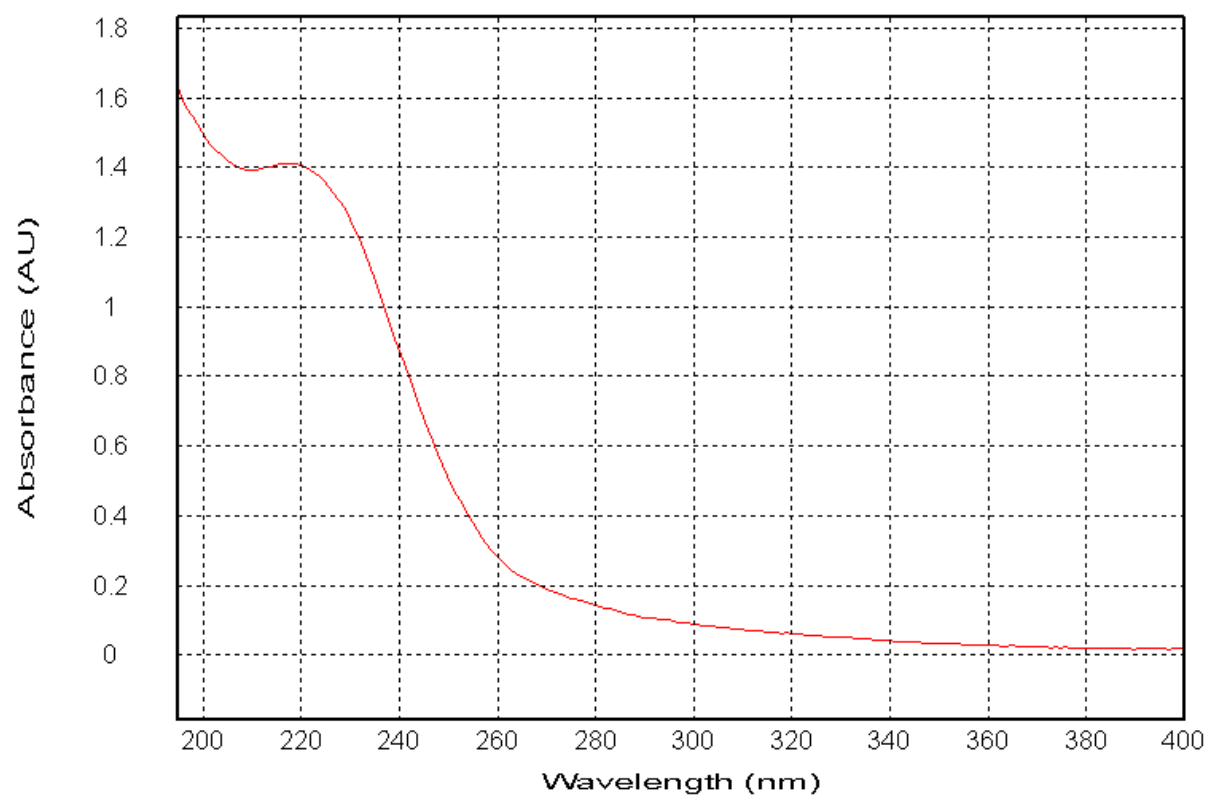

Figure S29. CD spectrum of 1

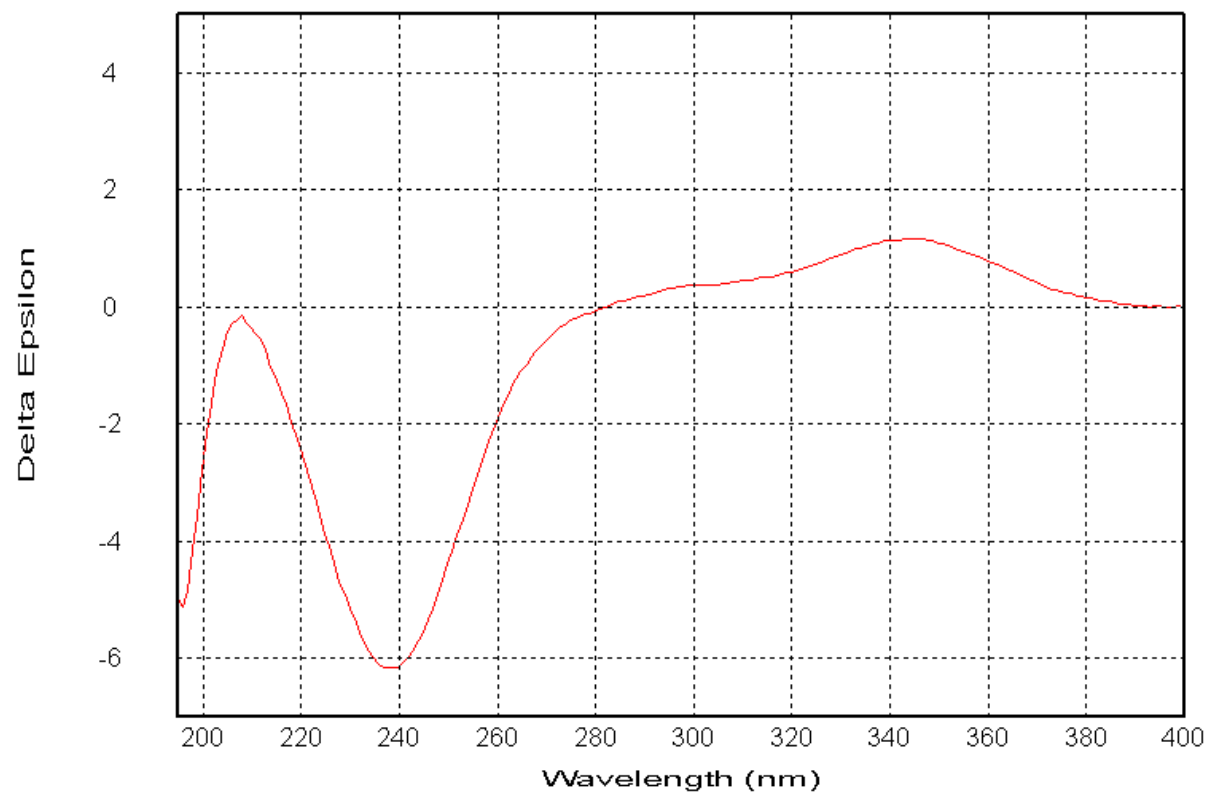

Figure S30. UV spectrum of 2

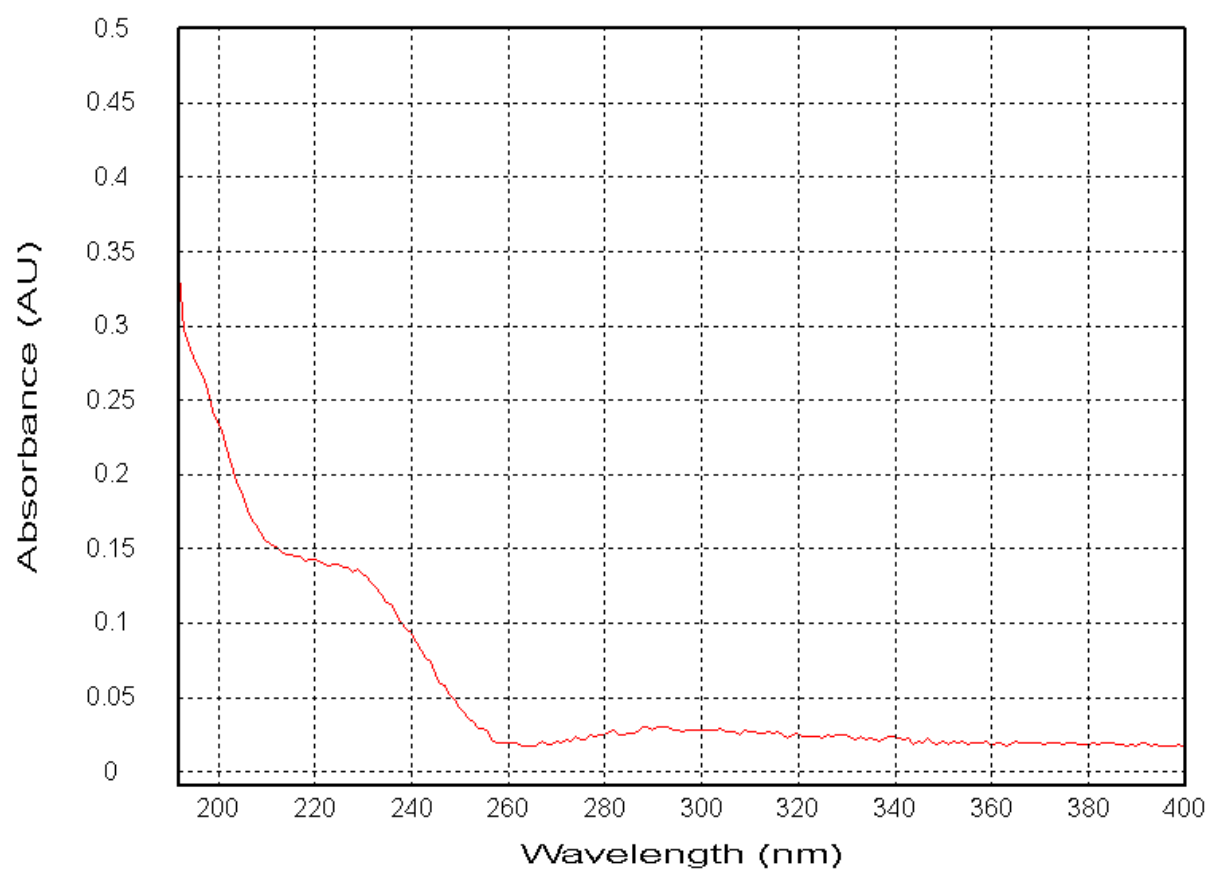

Figure S31. CD spectrum of 2

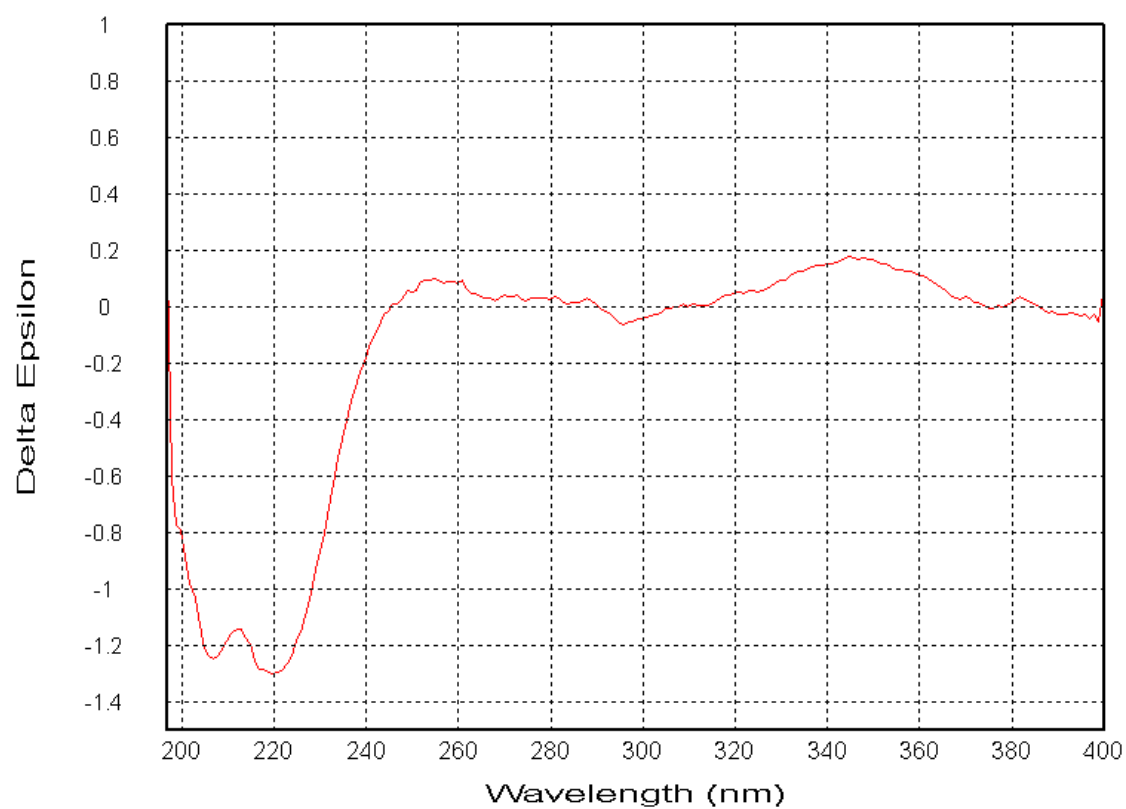

Figure S32. UV spectrum of 3

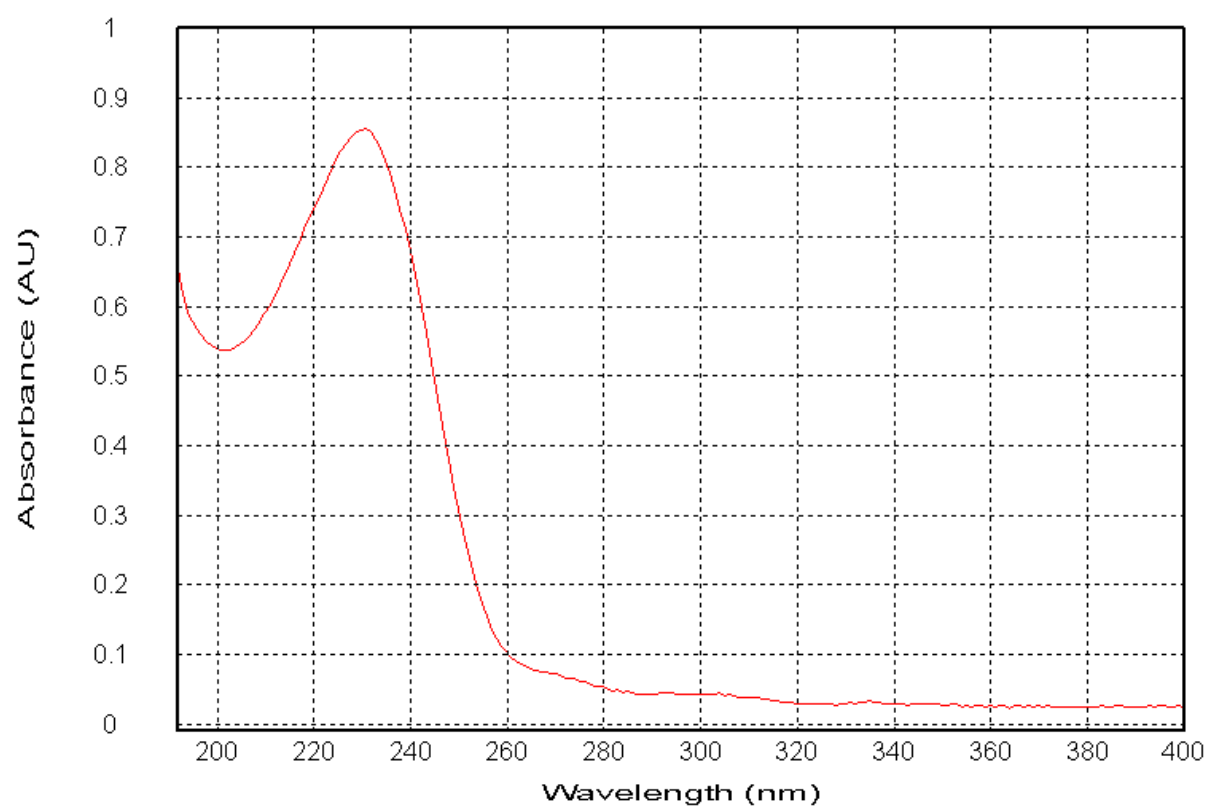

Figure S33. CD spectrum of 3

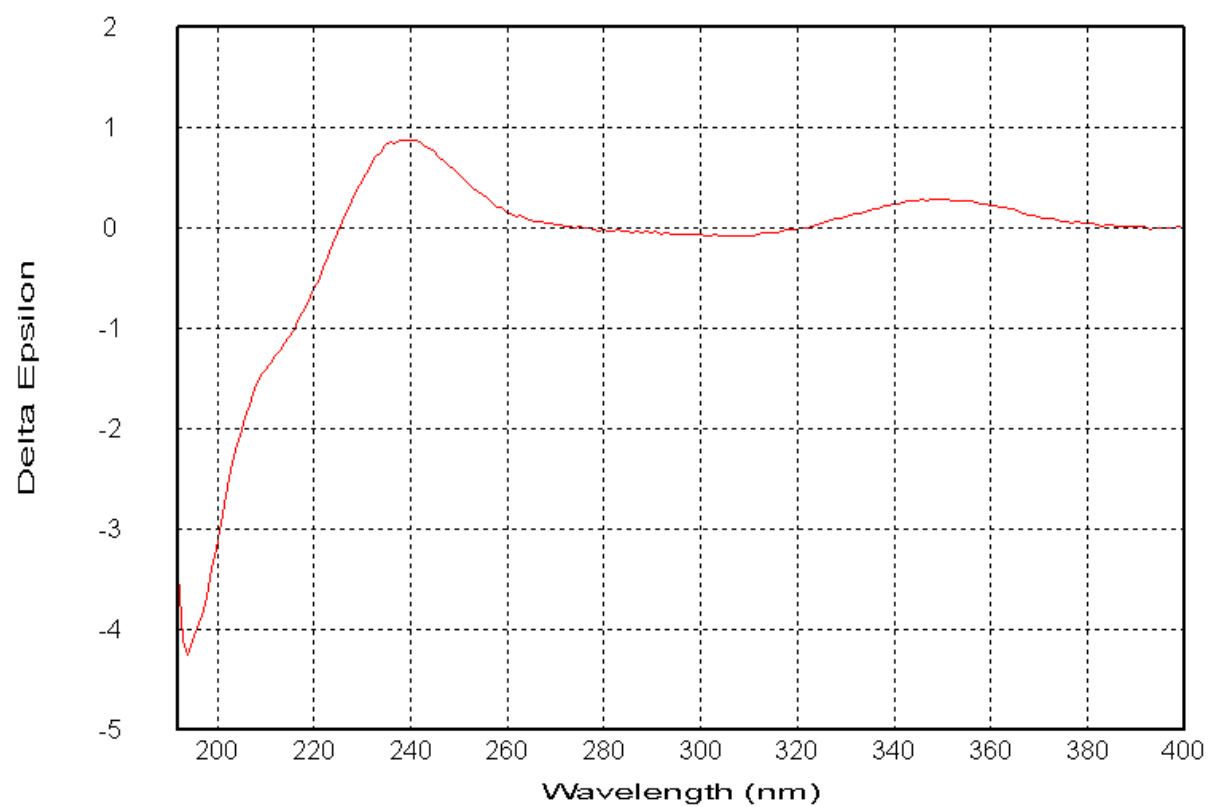

Figure S34. UV spectrum of 4

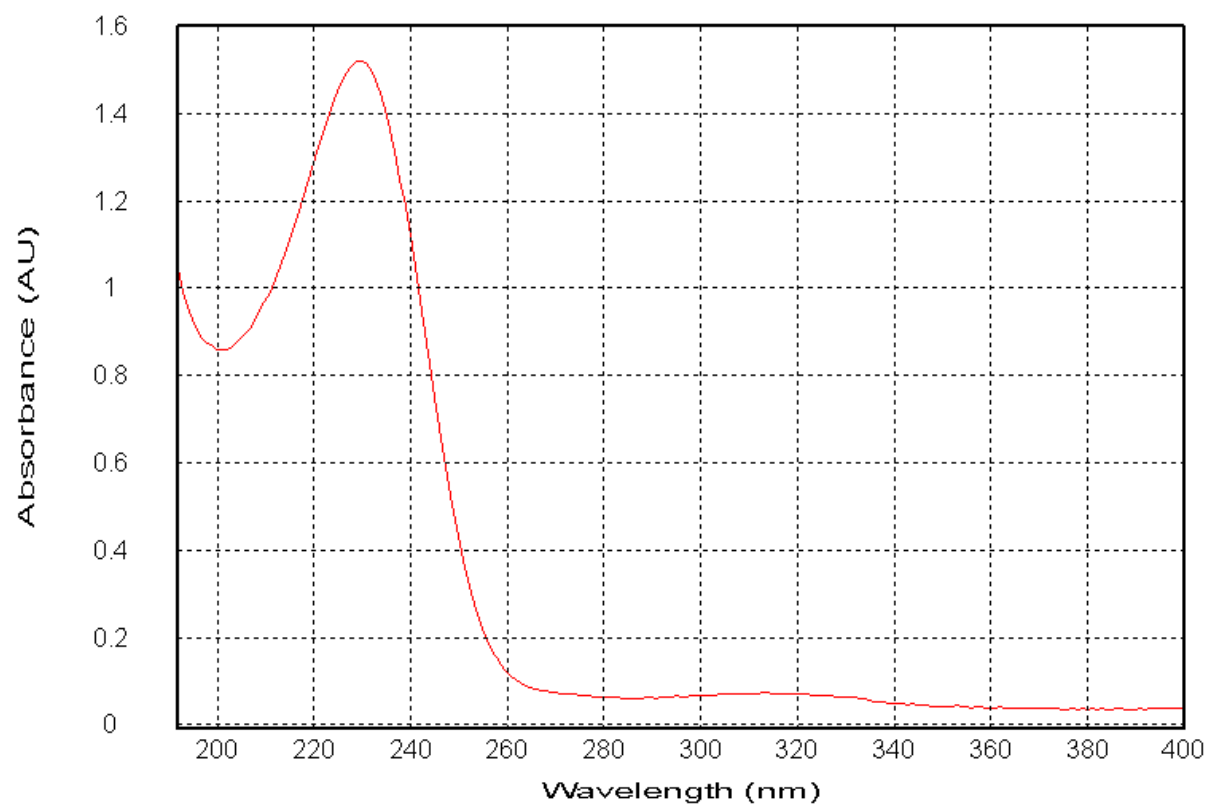

Figure S35. The experimental and calculated ECD spectra of 4

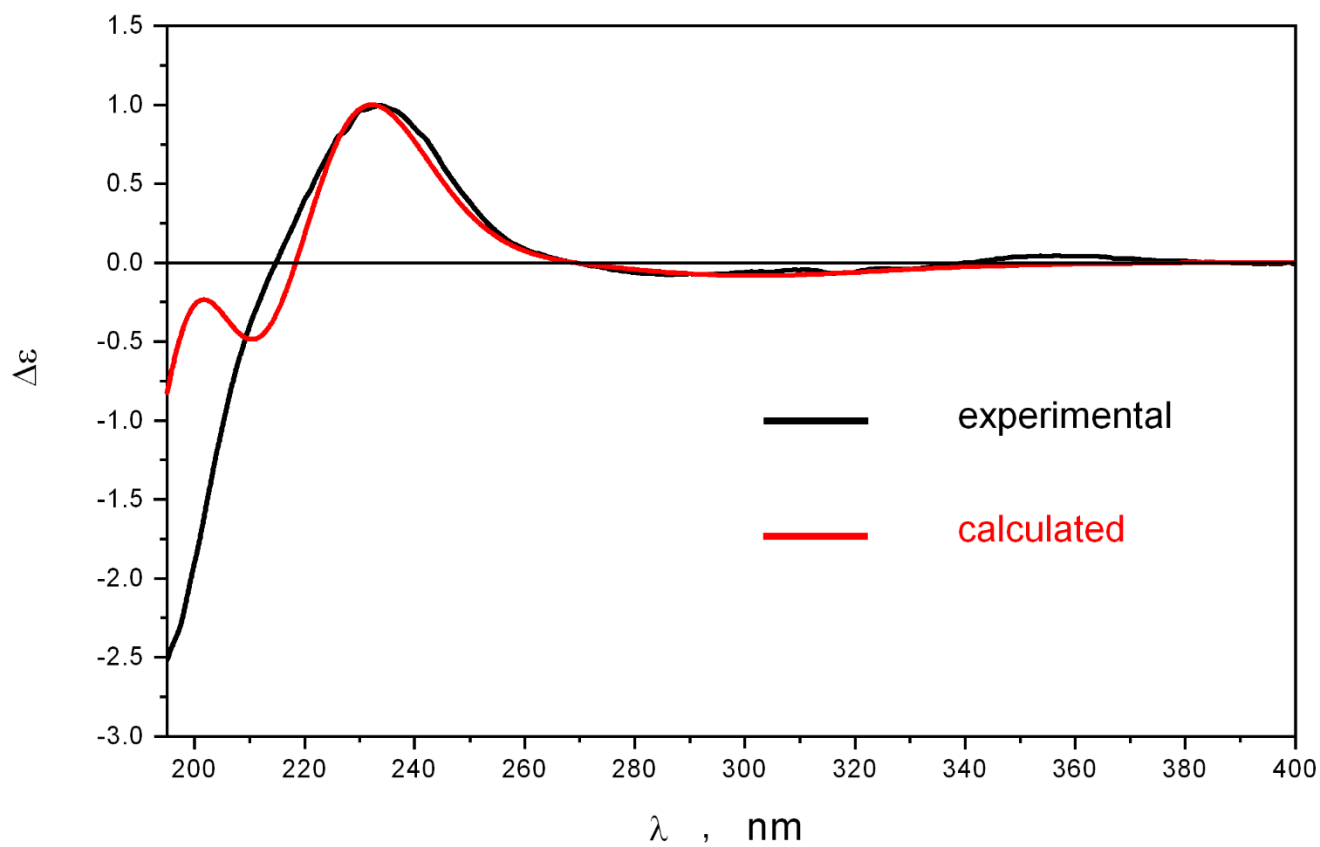



Figure S36. UV spectrum of 5

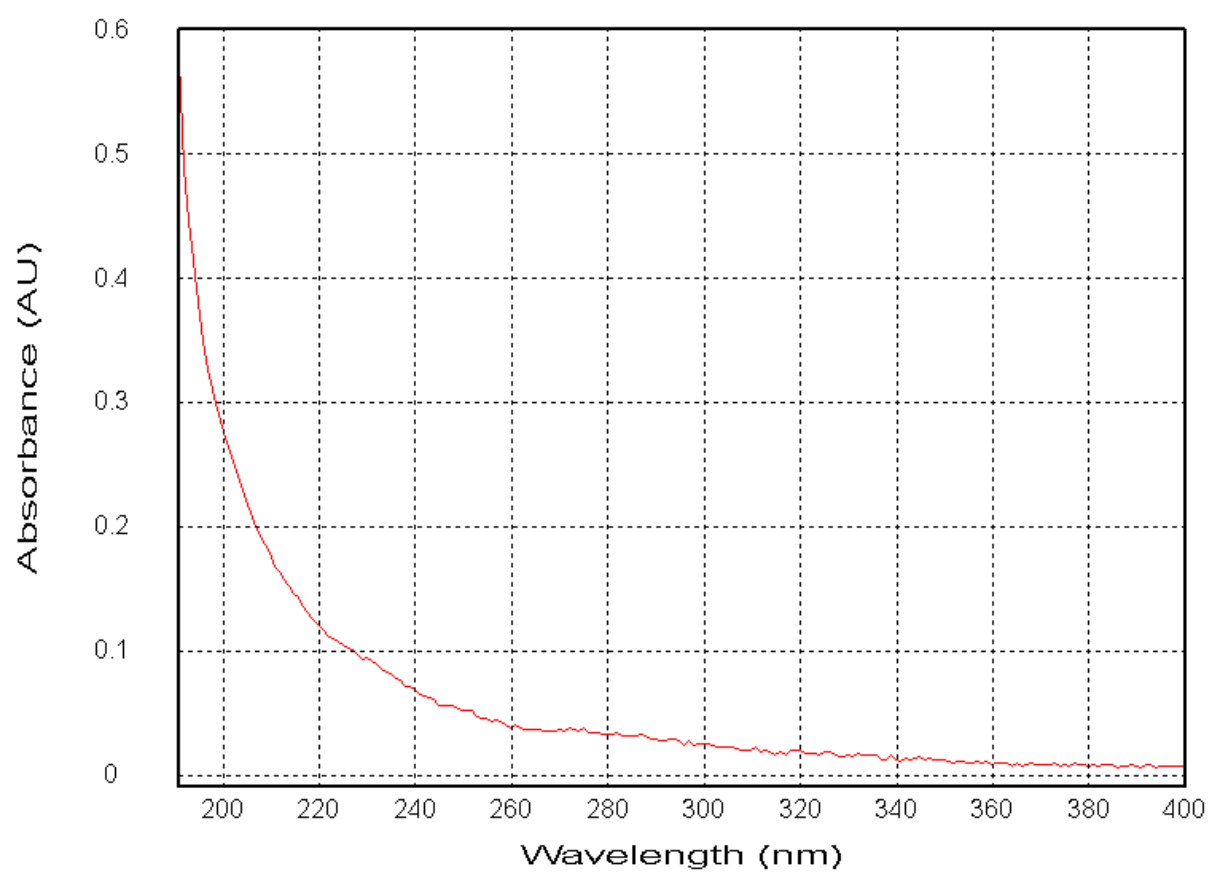

Figure S37. CD spectrum of 5

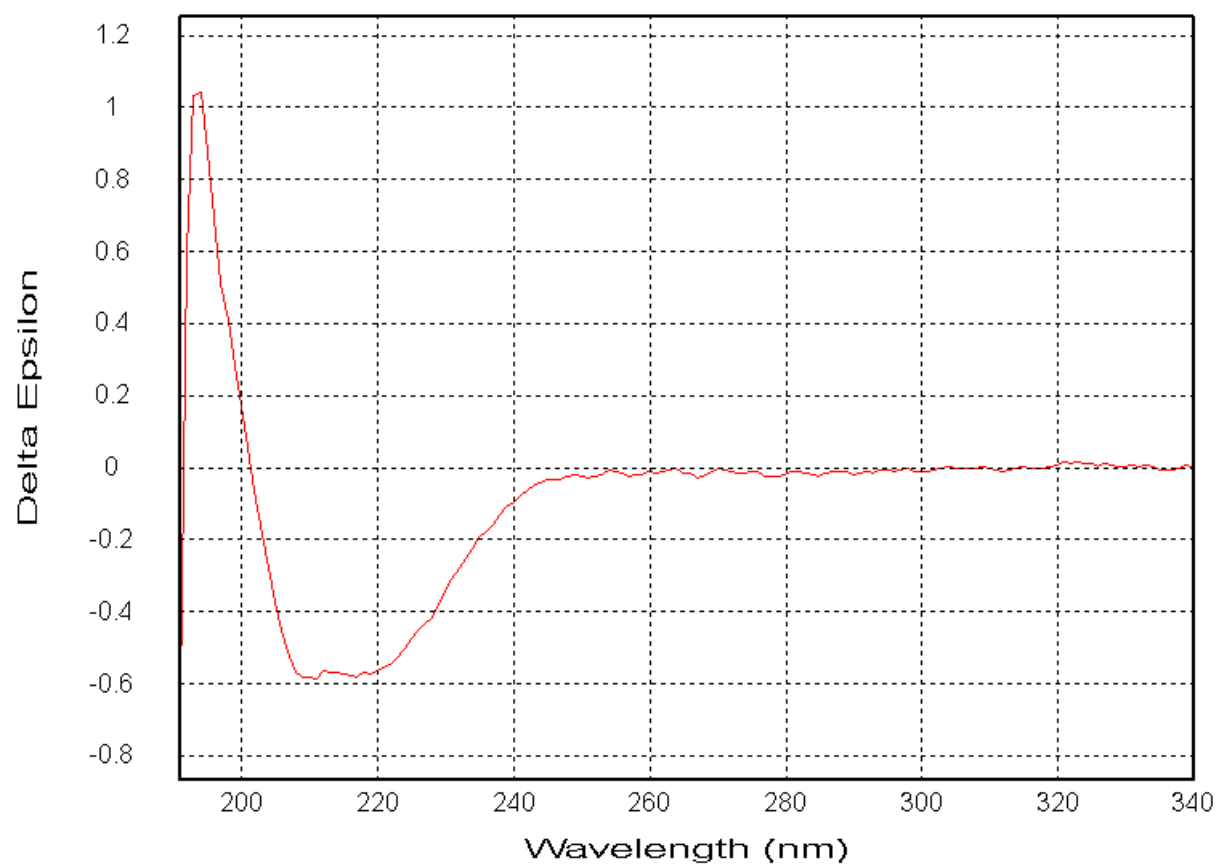

Figure S38. HR (+)ESI MS spectrum of 1

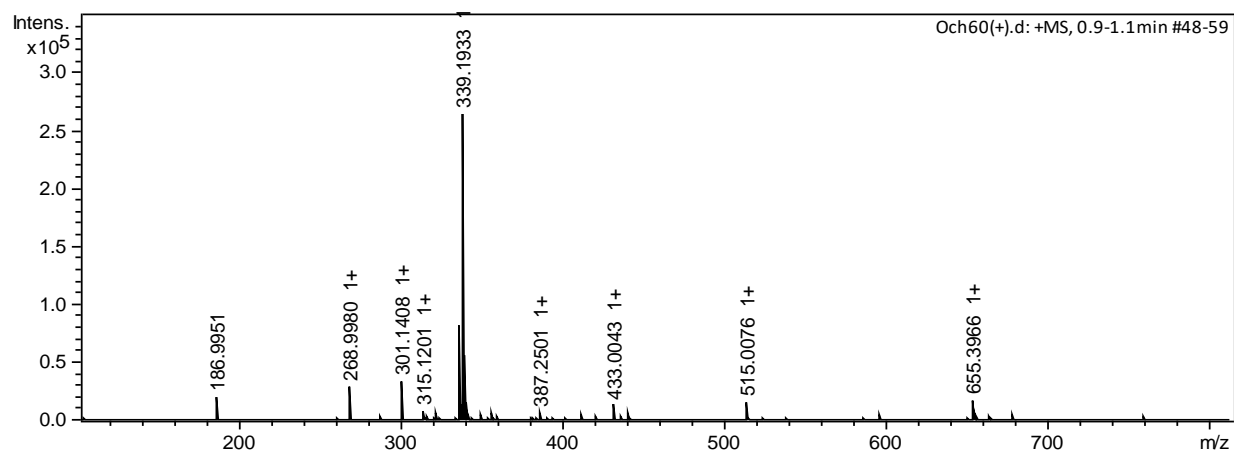

Figure S39. HR (+)ESI MS spectrum of 2

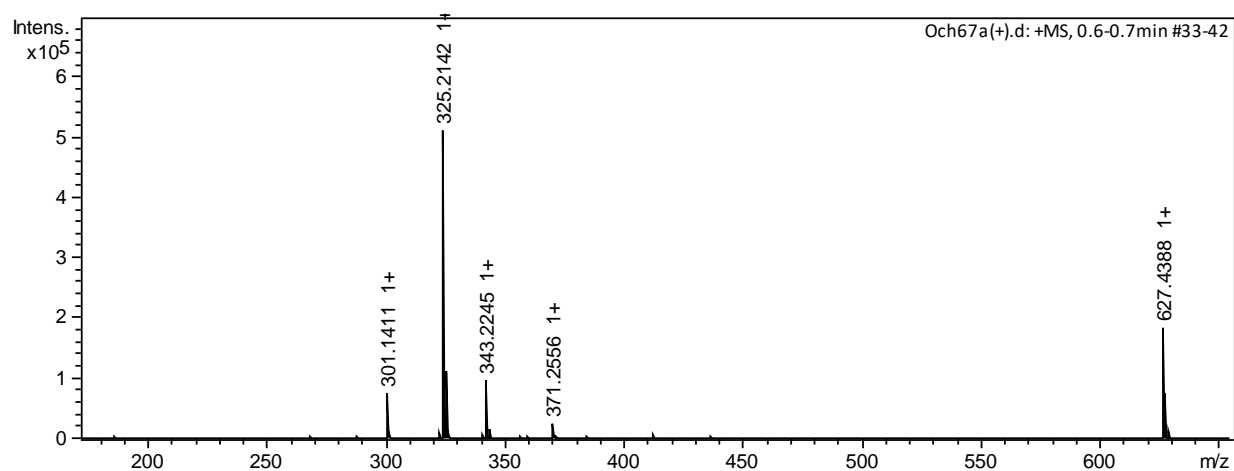

Figure S40. HR (+)ESI MS spectrum of 3

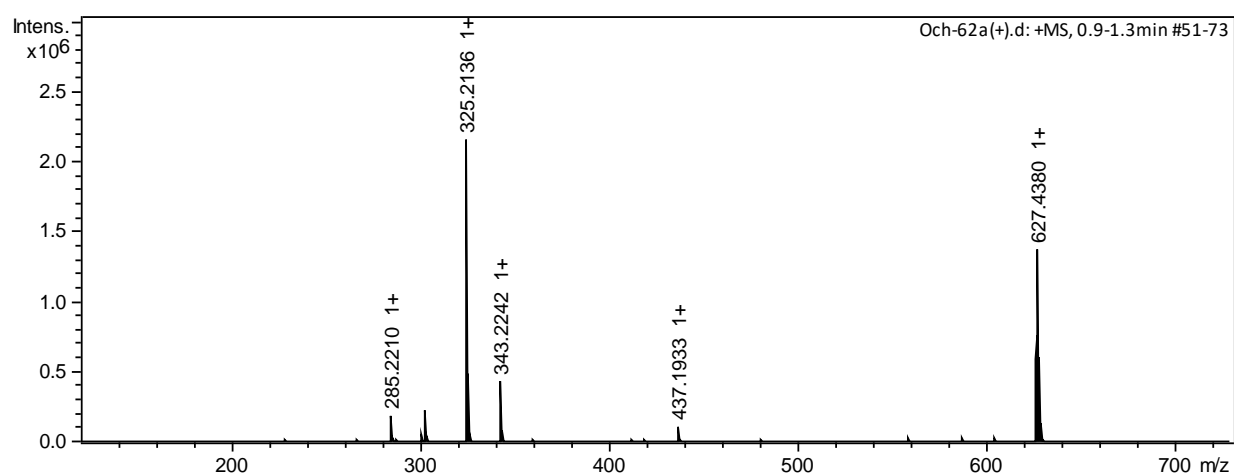

Figure S41. HR (+)ESI MS spectrum of 4

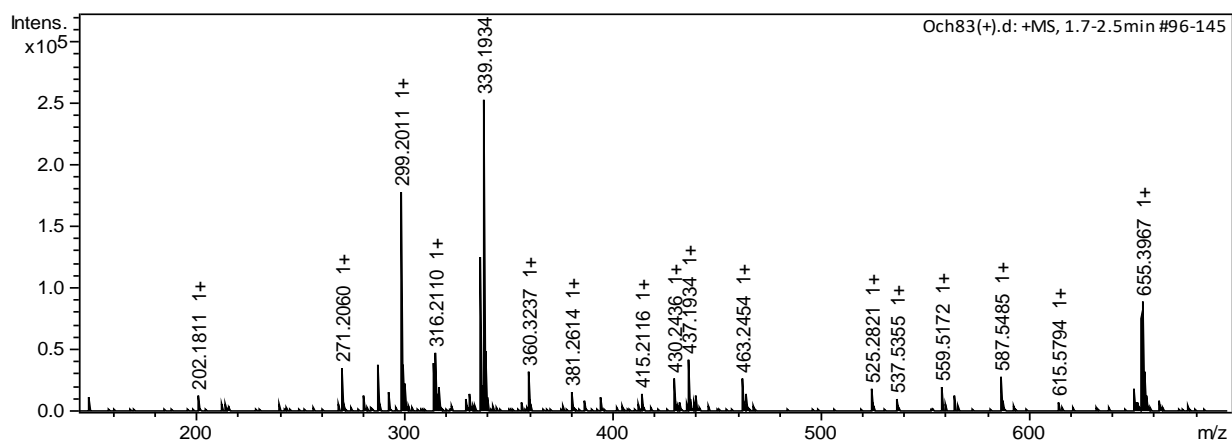

Figure S42. HR (+)ESI MS spectrum of 5

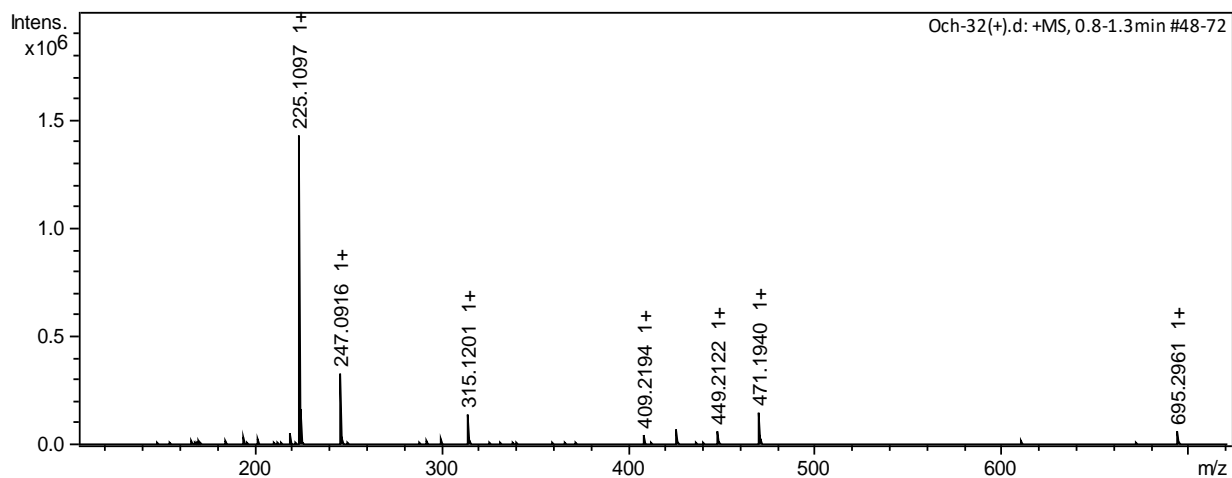

Figure S43. HR (+)ESI MS spectrum of 6

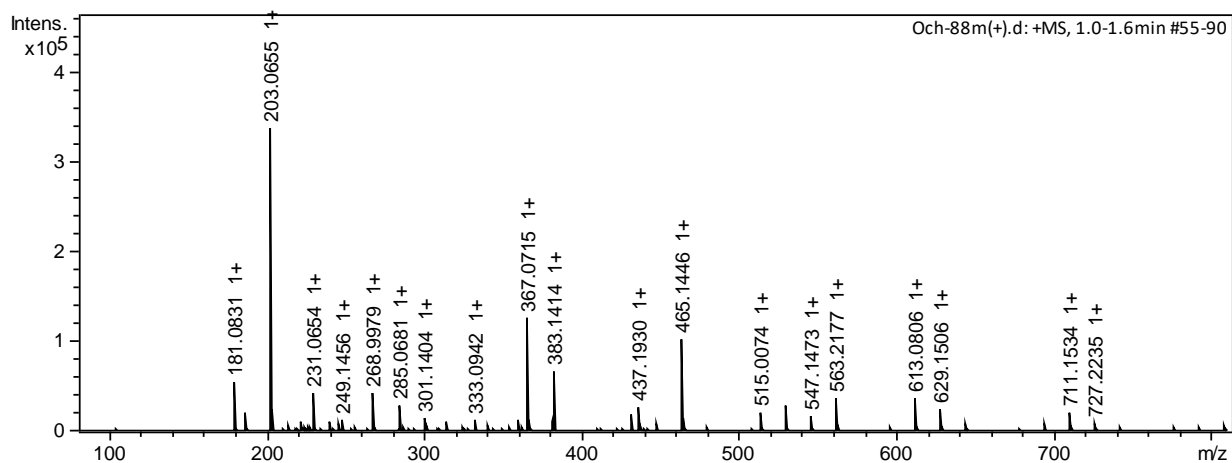

Figure S44. <sup>1</sup>H NMR spectrum for (*R*)-MTPA esters (500 MHz, CDCl<sub>3</sub>) of (3b)

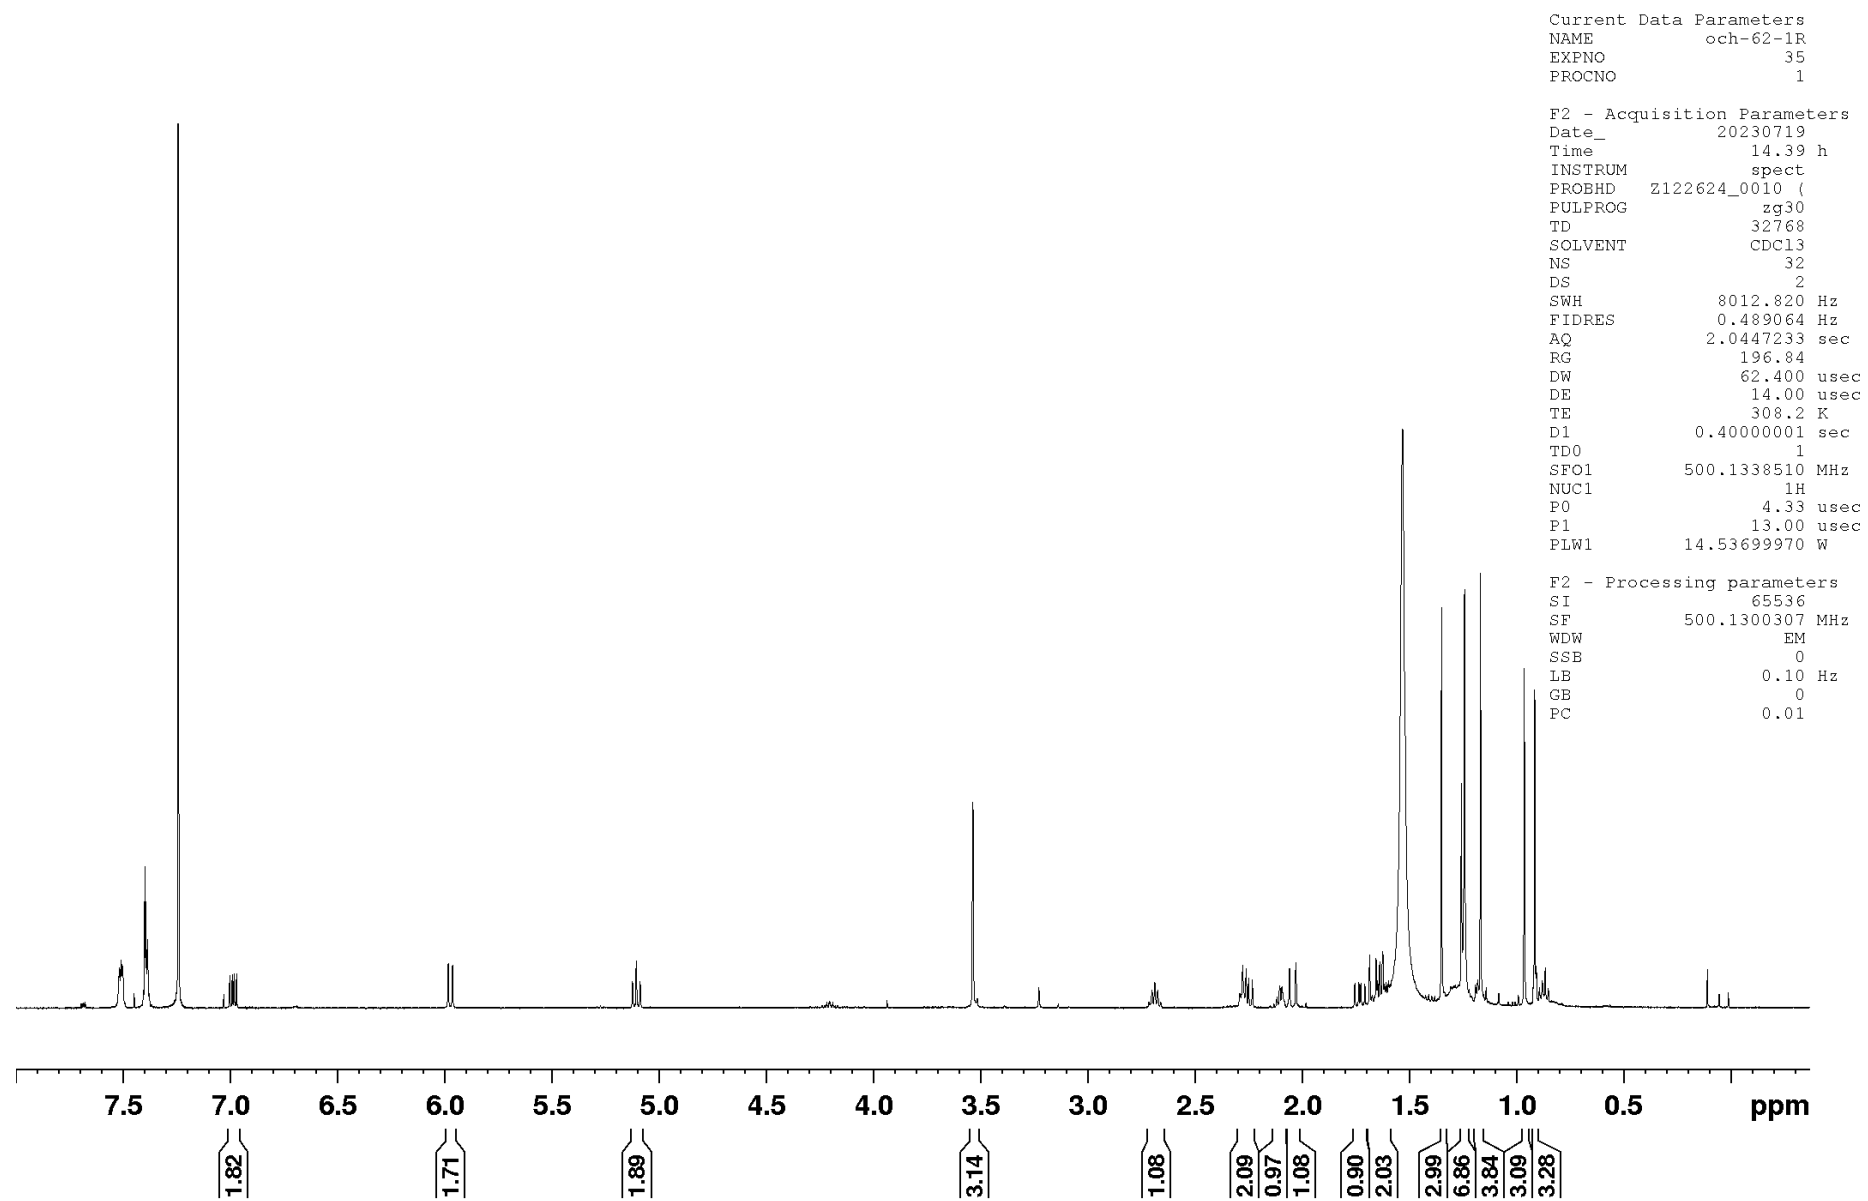

Figure S45.  $^1\text{H}$ - $^1\text{H}$  COSY NMR spectrum for (R)-MTPA esters (500 MHz,  $\text{CDCl}_3$ ) of (3b)

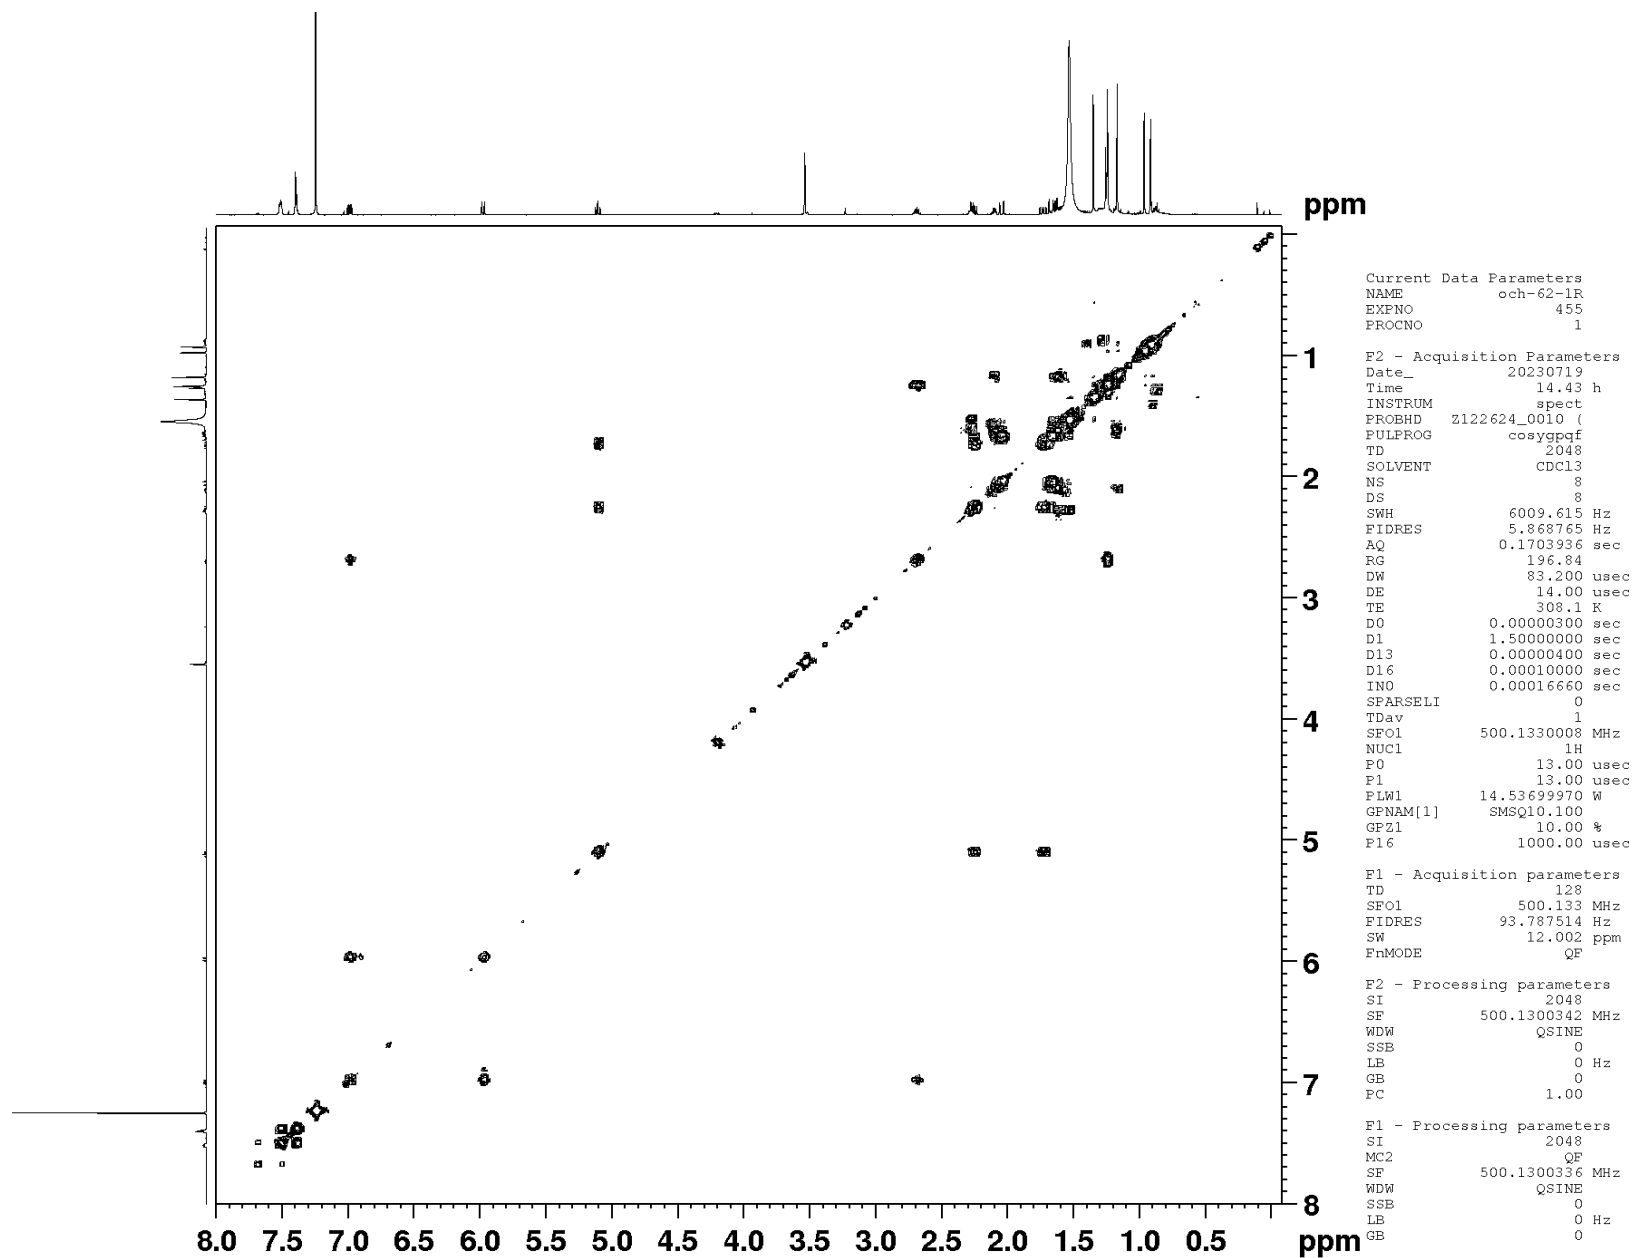

Figure S46. HR (+)ESI MS spectrum of for (R)-MTPA esters of (3b)

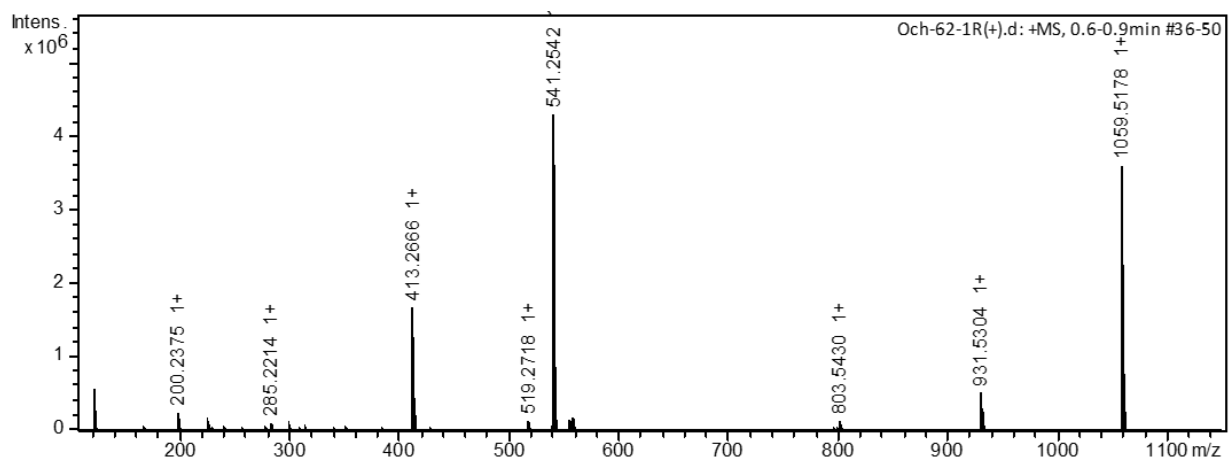

Figure S47. <sup>1</sup>H NMR spectrum for (S)-MTPA esters (500 MHz, CDCl<sub>3</sub>) of (3a)

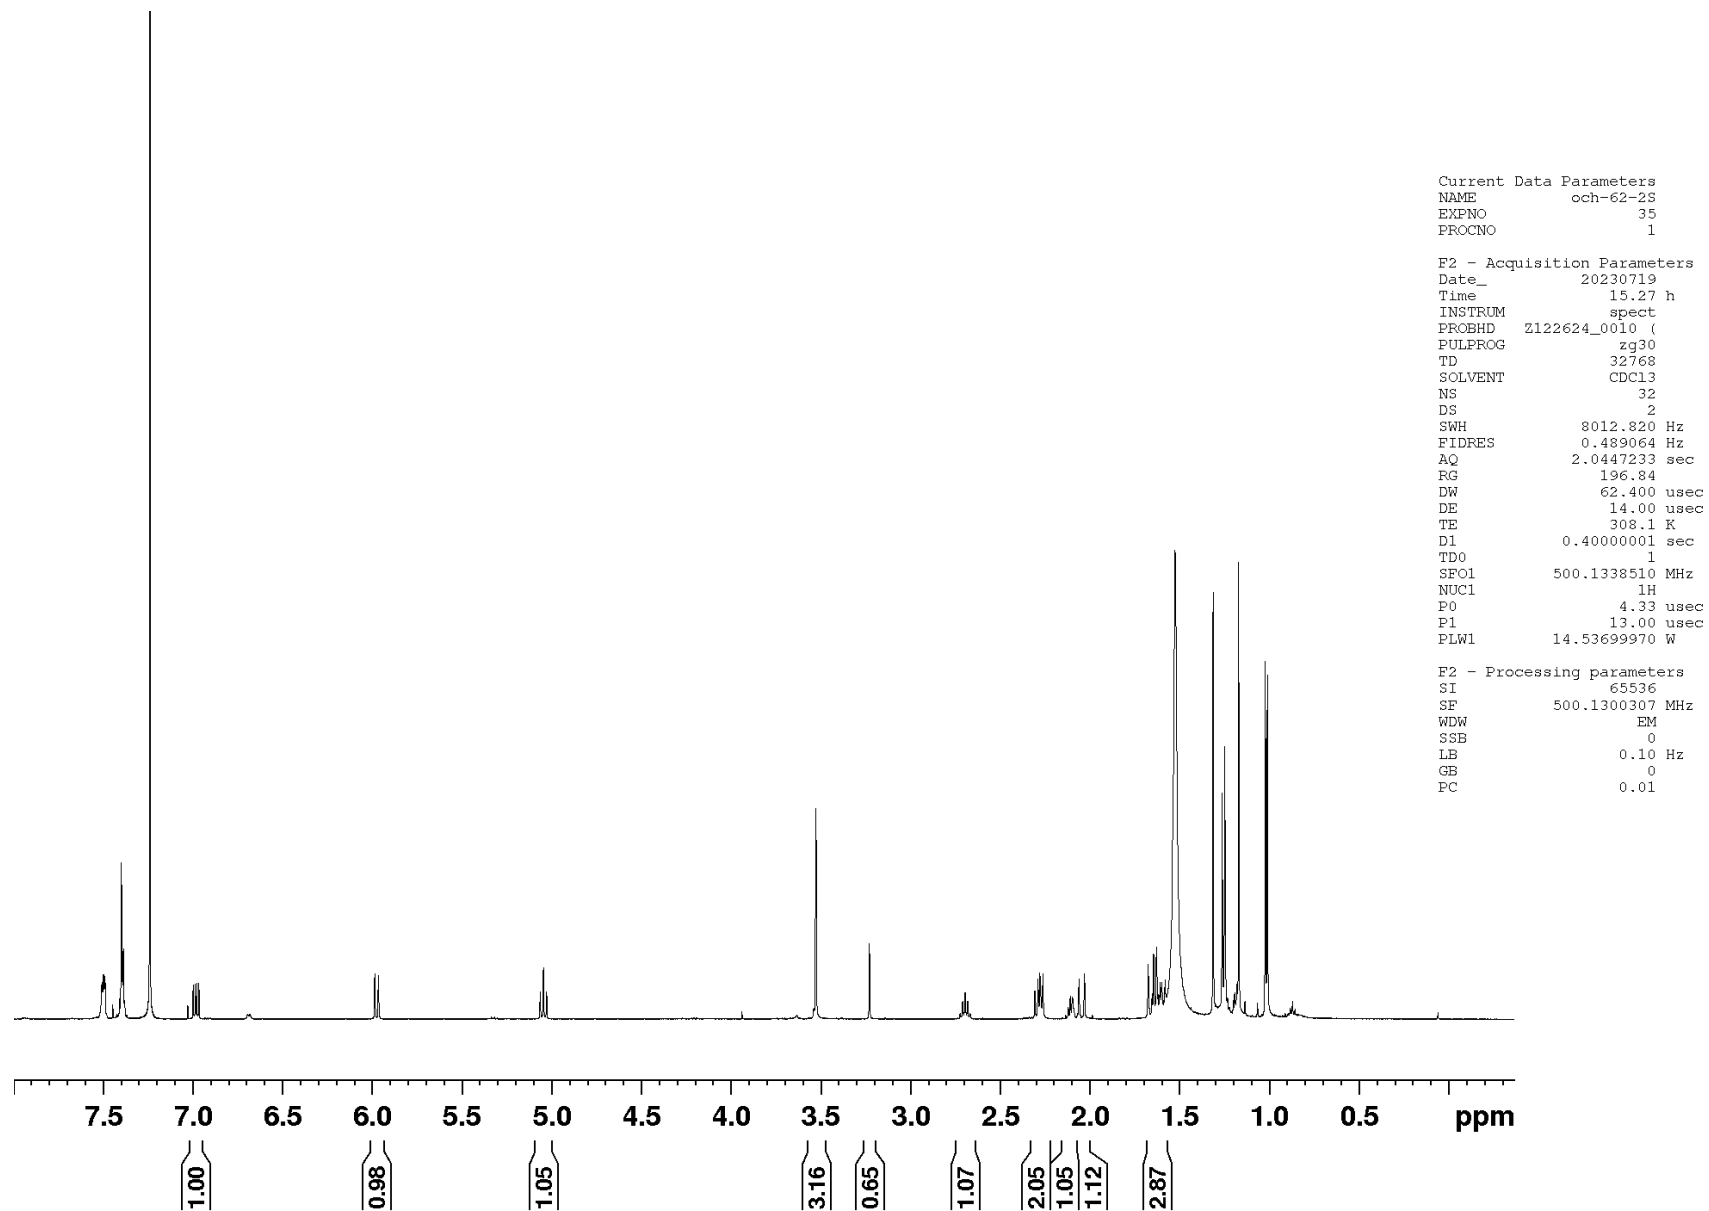

Figure S48.  $^1\text{H}$ - $^1\text{H}$  COSY NMR spectrum for (S)-MTPA esters (500 MHz,  $\text{CDCl}_3$ ) of (3a)

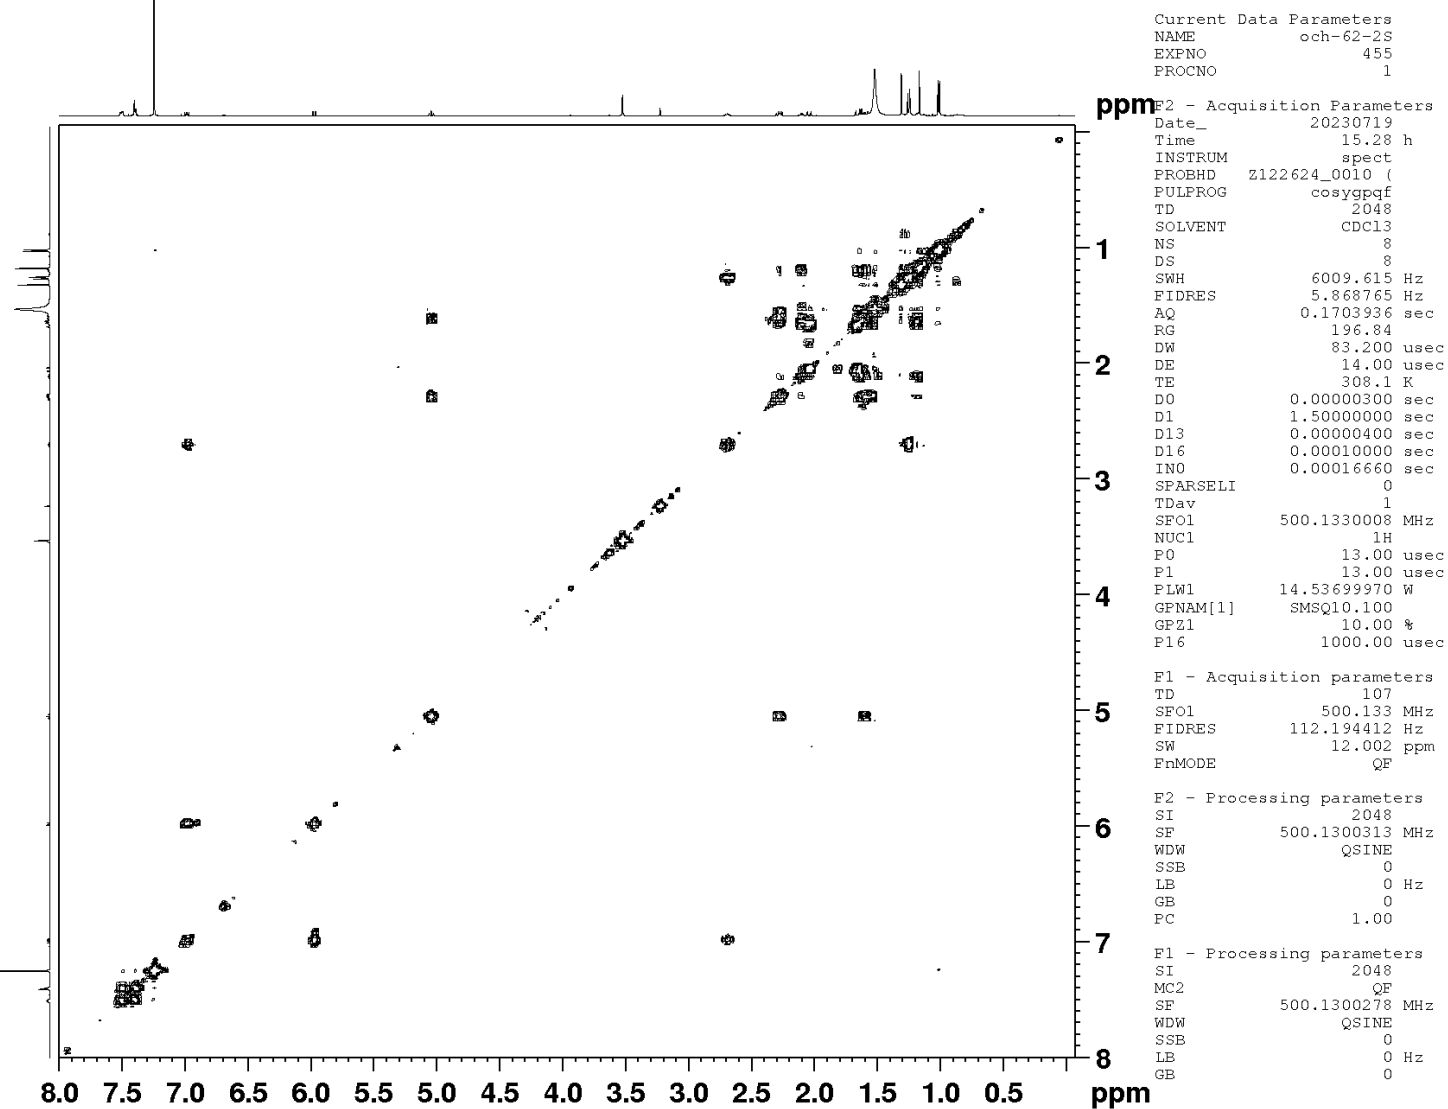



Figure S49. HR (+)ESI MS spectrum of for (S)-MTPA esters of (3a)

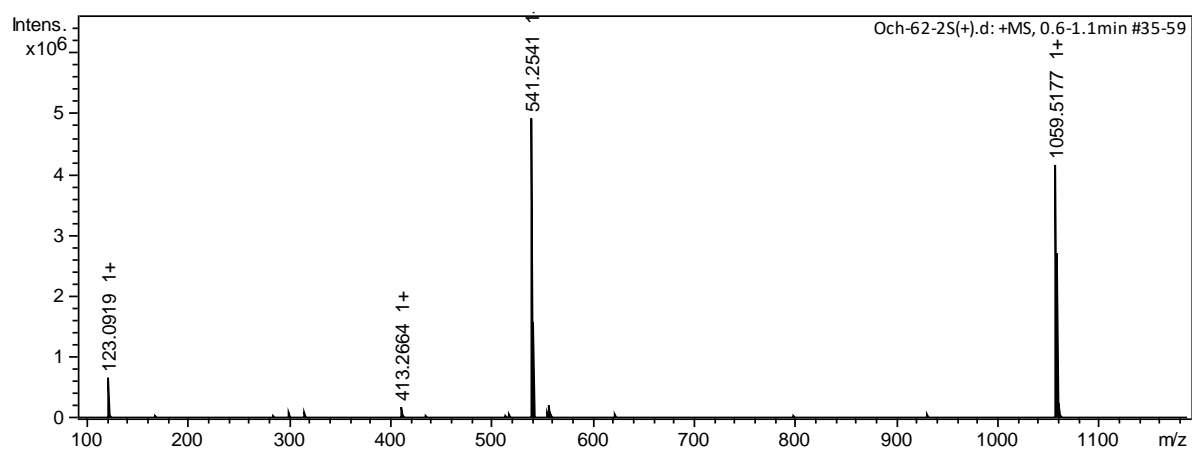

Figure S50. Comparison of the experimental ECD spectra of compounds 1–4

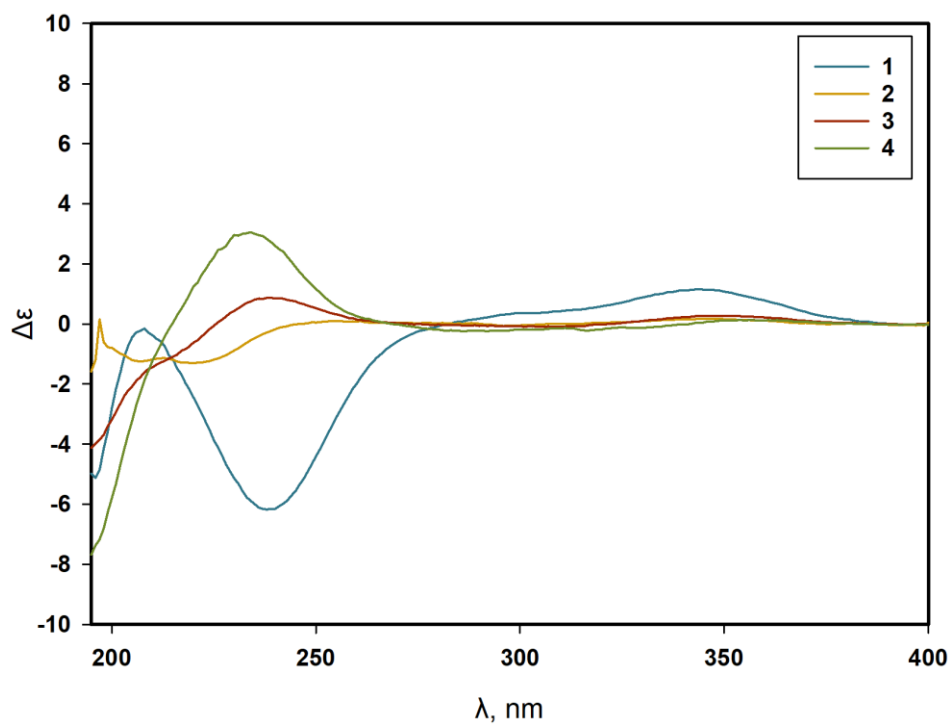

Supplement: s1 [file s1]
